# Supplementary material for: Asymmetric amination of α,α-dialkyl substituted aldehydes catalyzed by a simple chiral primary amino acid and its application to the preparation of a S1P1 agonist
Source: Royal Society of Chemistry journal article supplement (doi:10.1039/c9ra06210f), 2019-01-01
Supplement: c9ra06210f1.pdf [file c9ra06210f1.pdf]

**Supporting Information**

**Asymmetric amination of  $\alpha$ ,  $\alpha$ -dialkyl substituted aldehydes catalyzed by a  
simple chiral primary amino acid and its application to the preparation of a S1P<sub>1</sub>  
agonist**

Qiong Xiao <sup>a</sup>, Yifan Tang <sup>b</sup>, Ping Xie <sup>\*,a</sup>, Dali Yin <sup>\*,a</sup>

<sup>a</sup> State Key Laboratory of Bioactive Substance and Function of Natural Medicines &  
Beijing Key Laboratory of Active Substance Discovery and Druggability Evaluation,  
Department of Medicinal Chemistry, Institute of Materia Medica, Peking Union  
Medical College and Chinese Academy of Medical Sciences, Beijing 100050, PR  
China

<sup>b</sup> Beijing Union Pharmaceutical Factory, PR China

*E-mail: yindali@imm.ac.cn, xp@imm.ac.cn*

**CONTENTS**

|                                  |              |
|----------------------------------|--------------|
| <b>Selected NMR spectra.....</b> | <b>2-31</b>  |
| <b>HPLC.....</b>                 | <b>32-57</b> |

### Selected NMR spectra

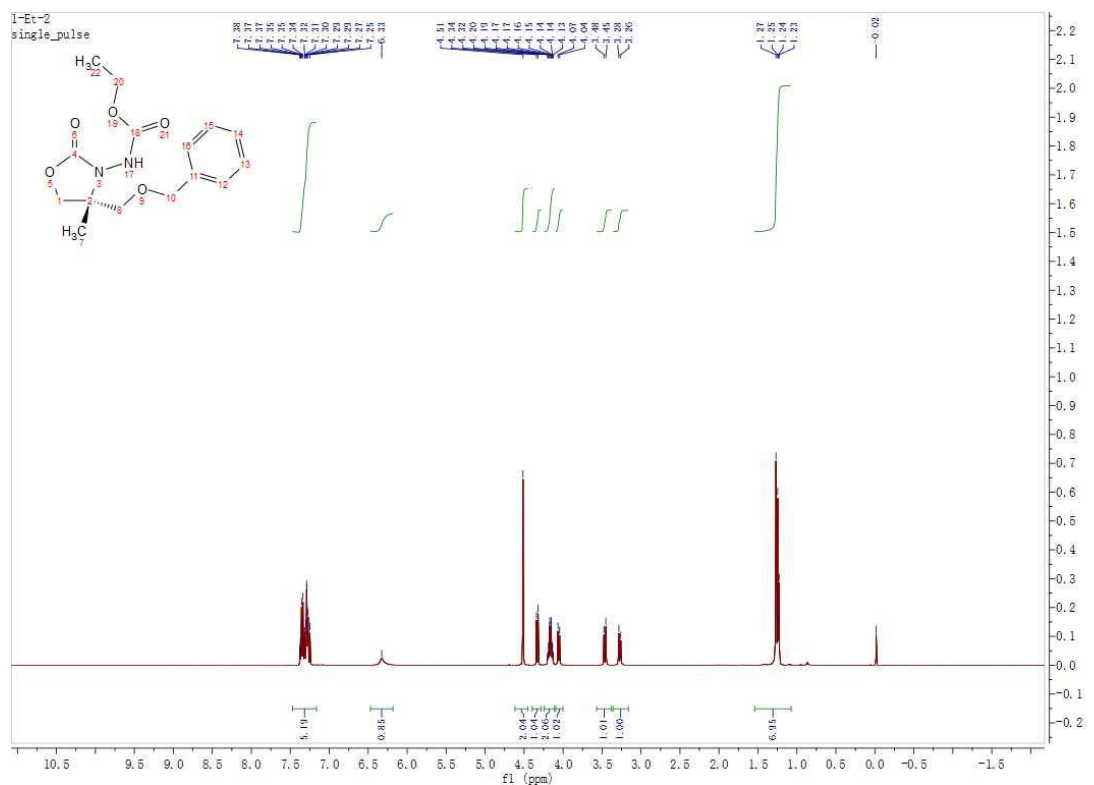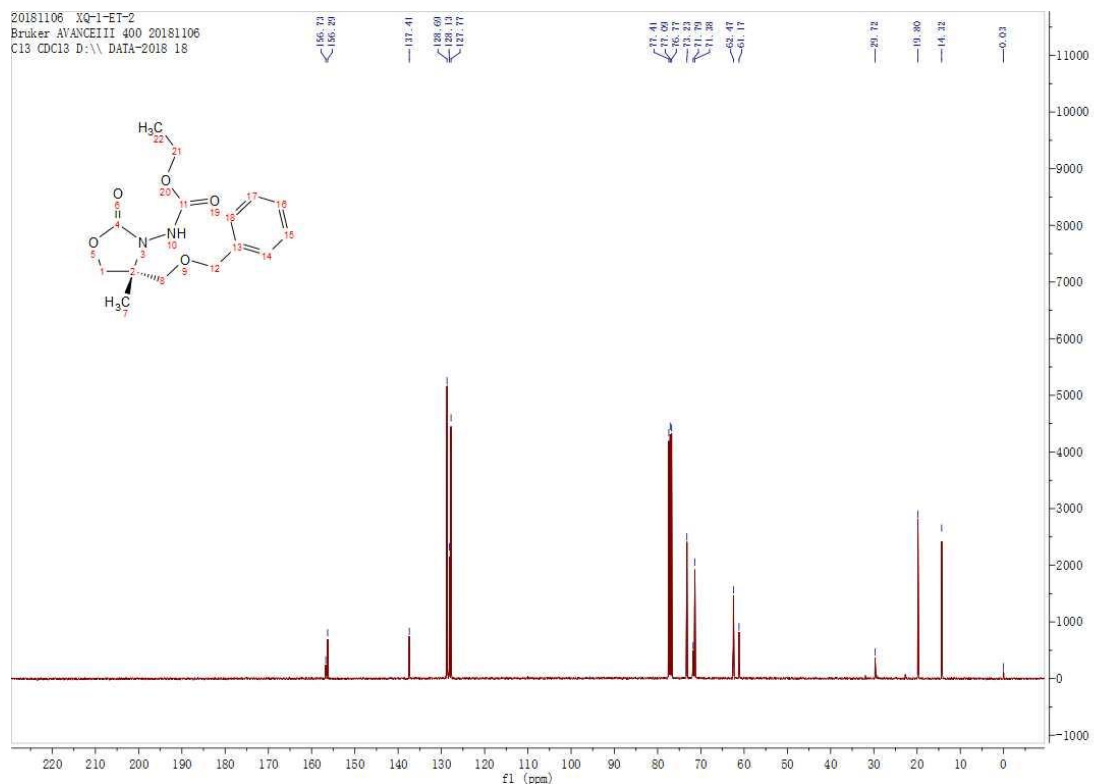

**5a-Et**

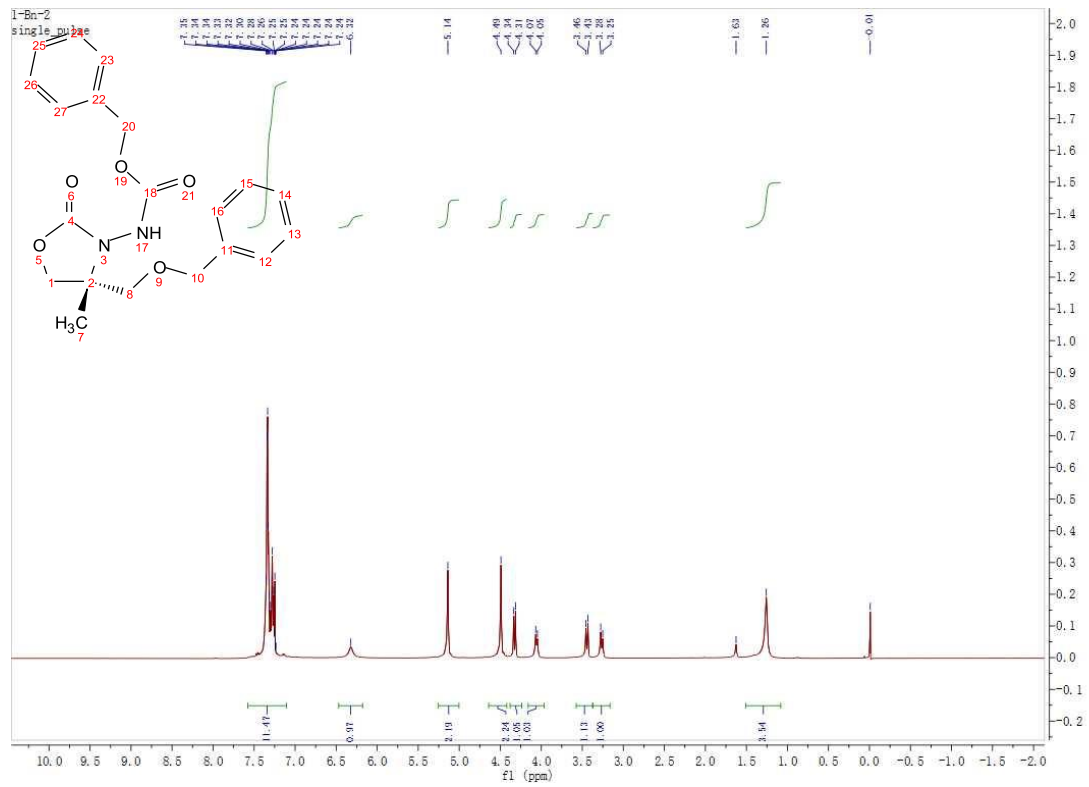

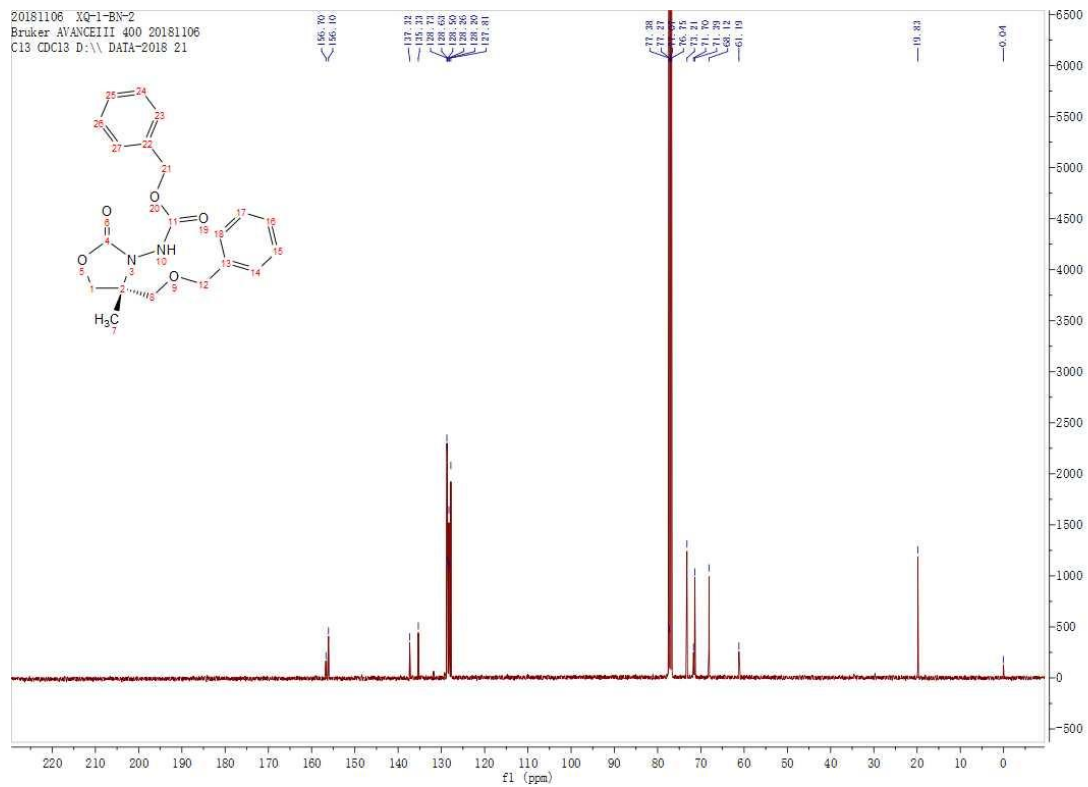

5a-Bn

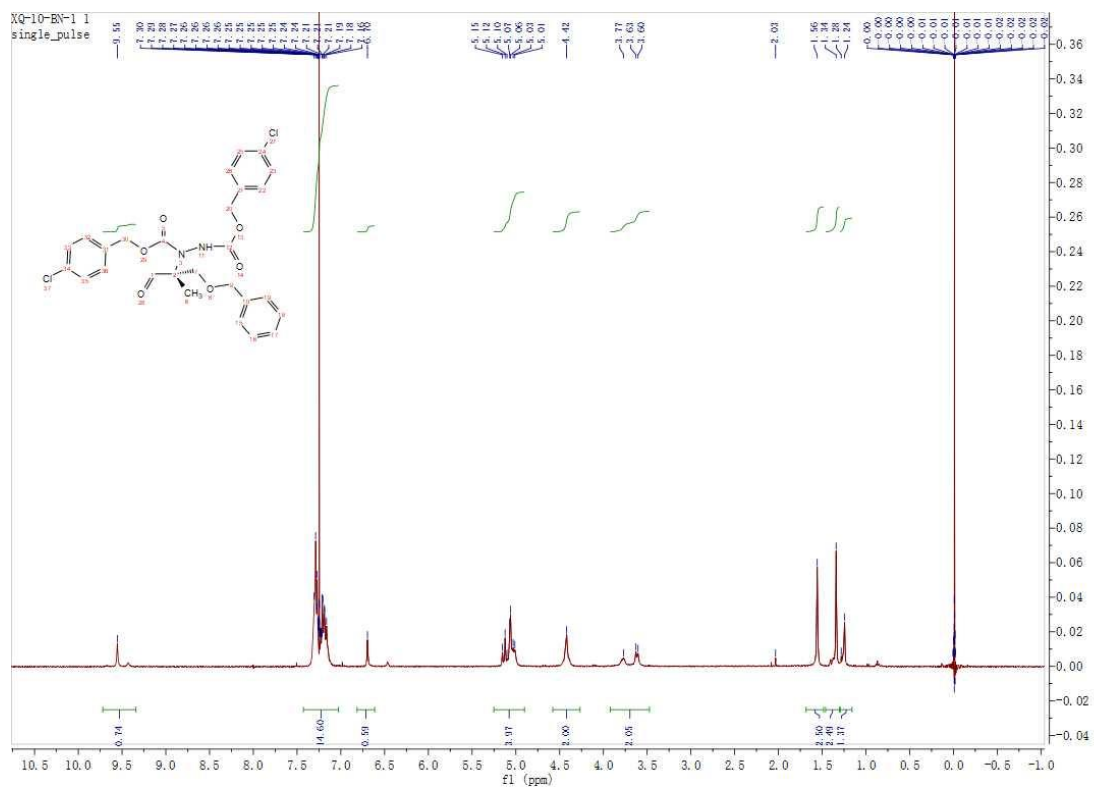

4a-p-ClBn

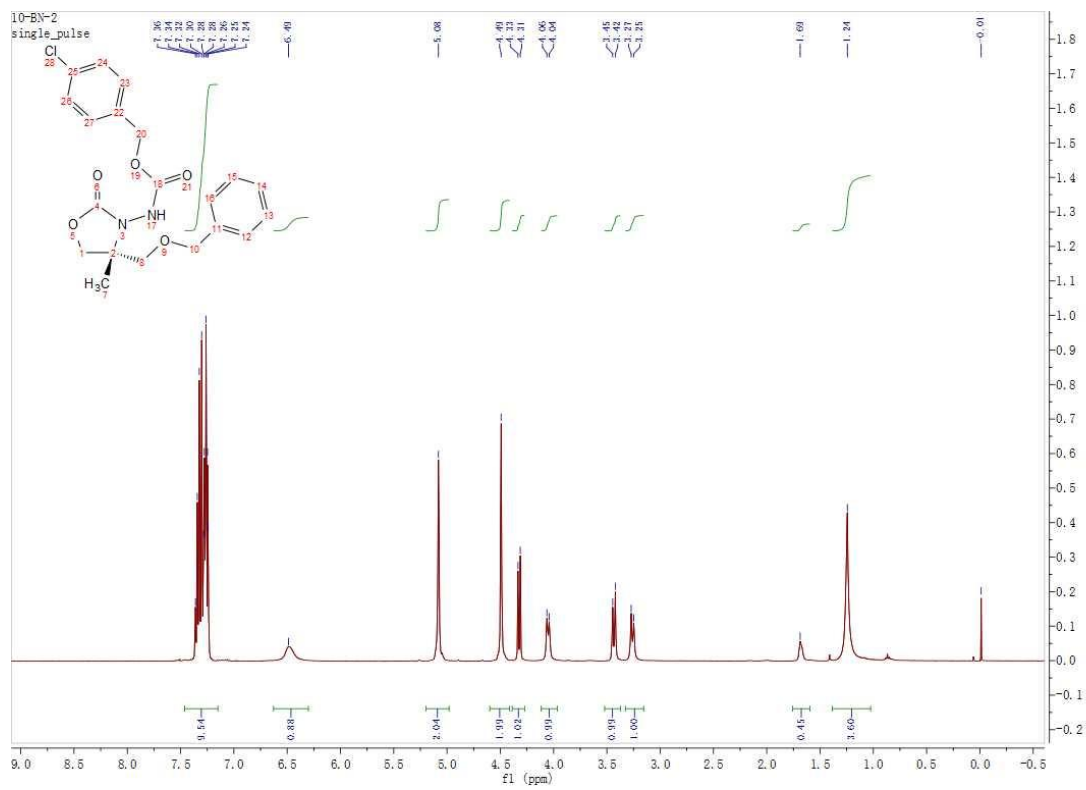

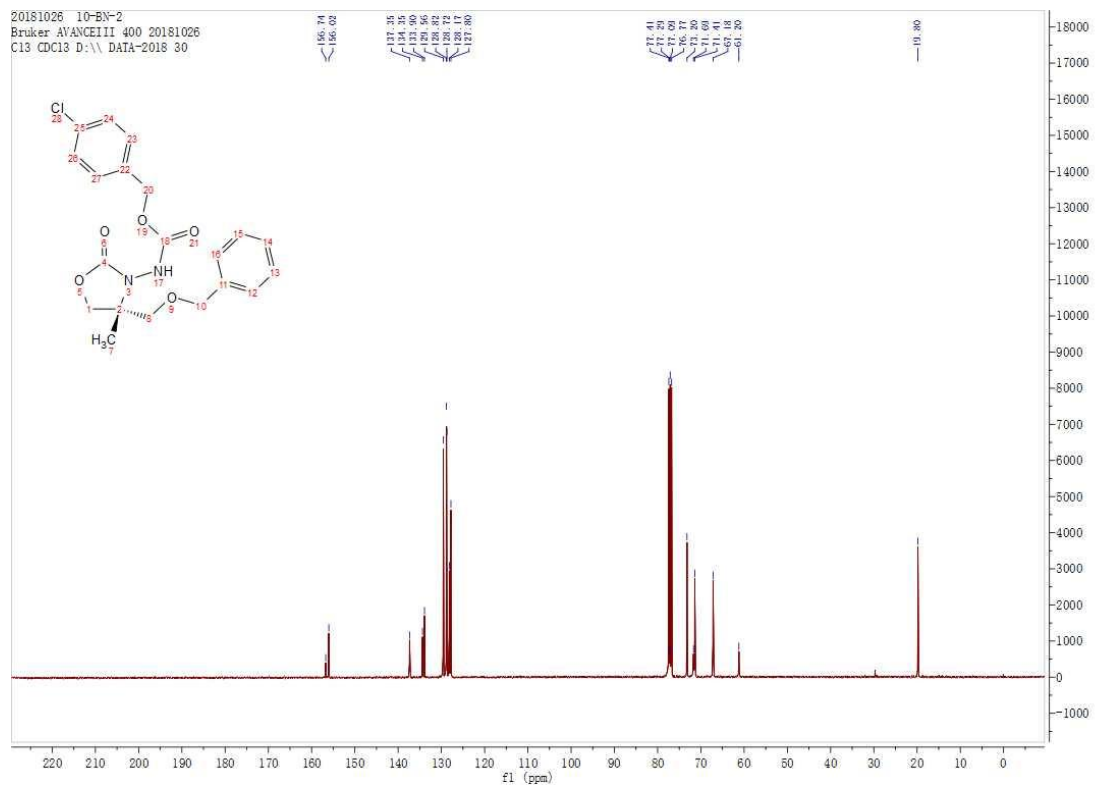

5a-p-ClBn

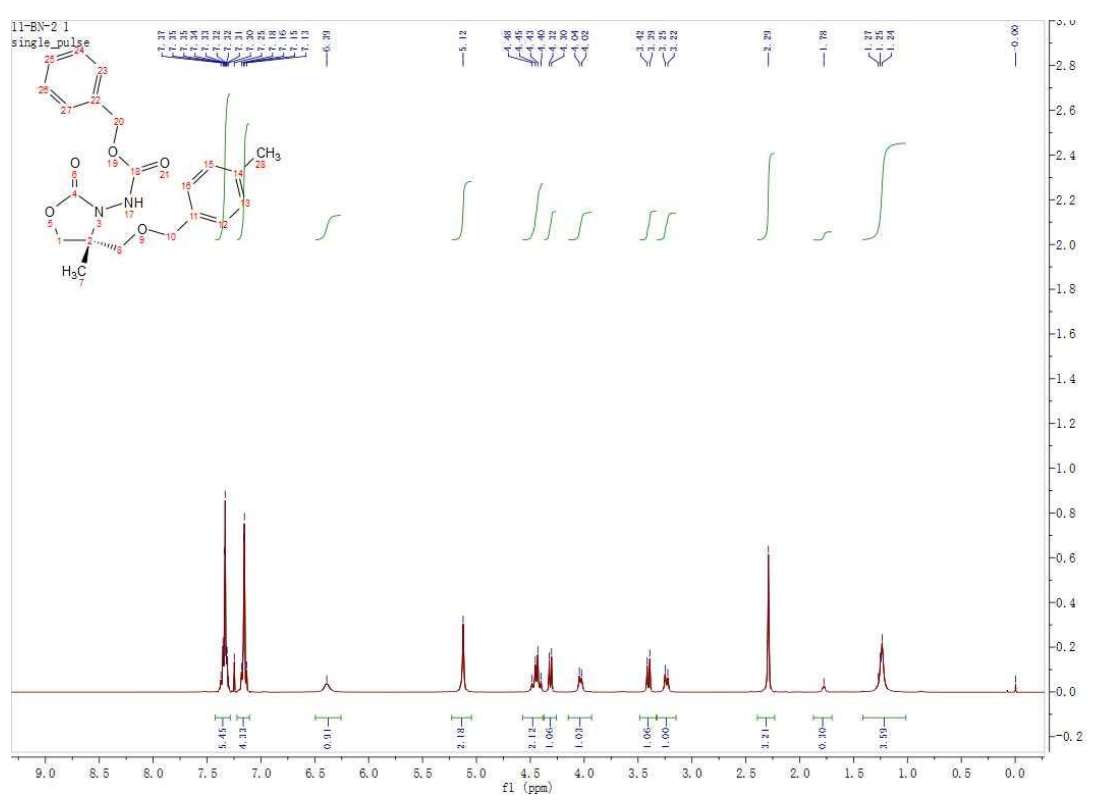

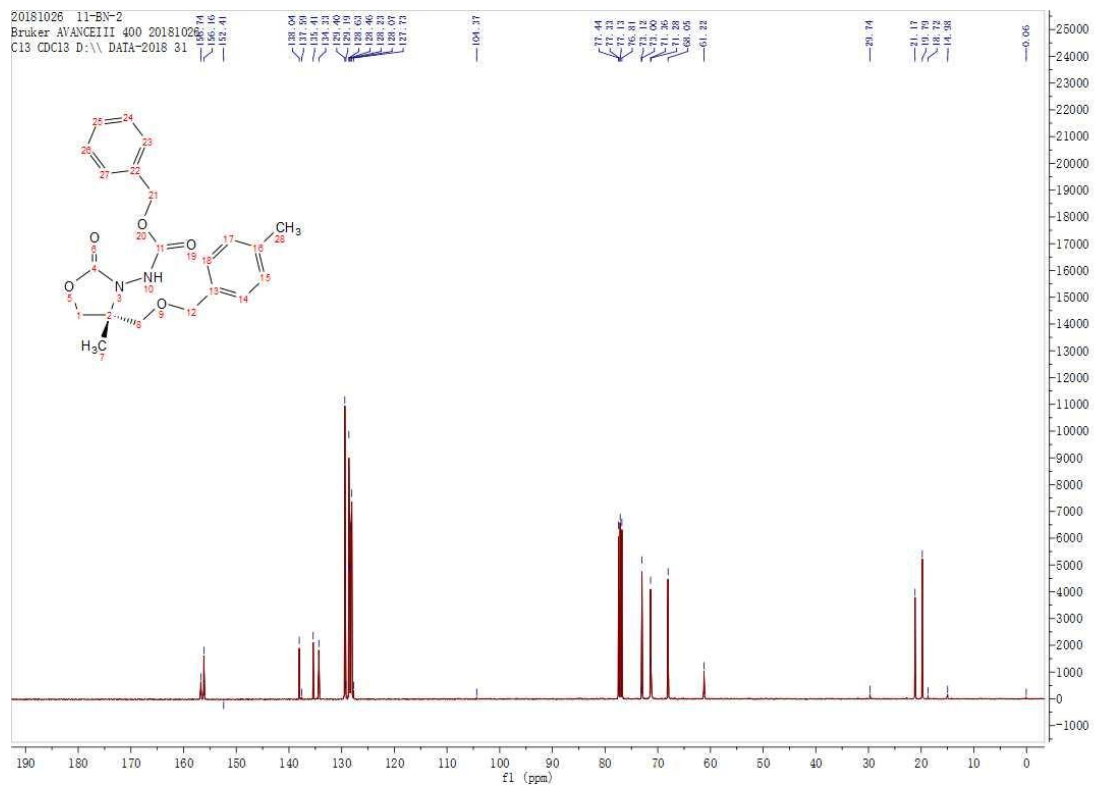

5b-Bn

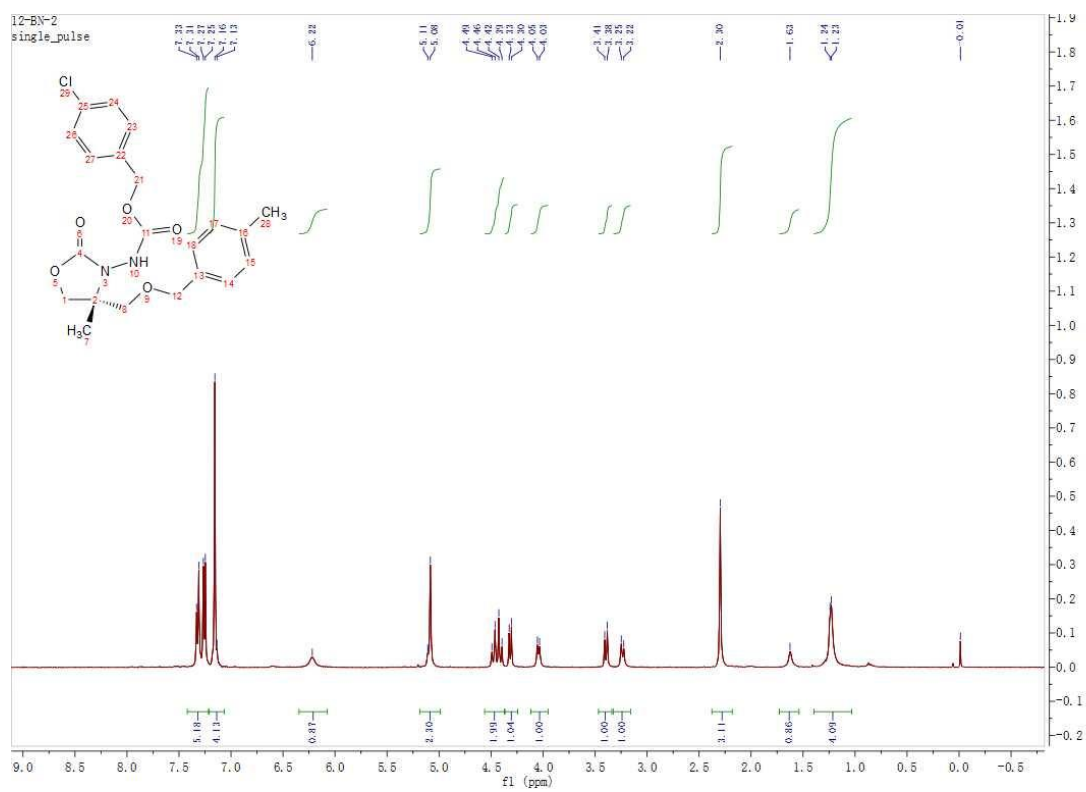

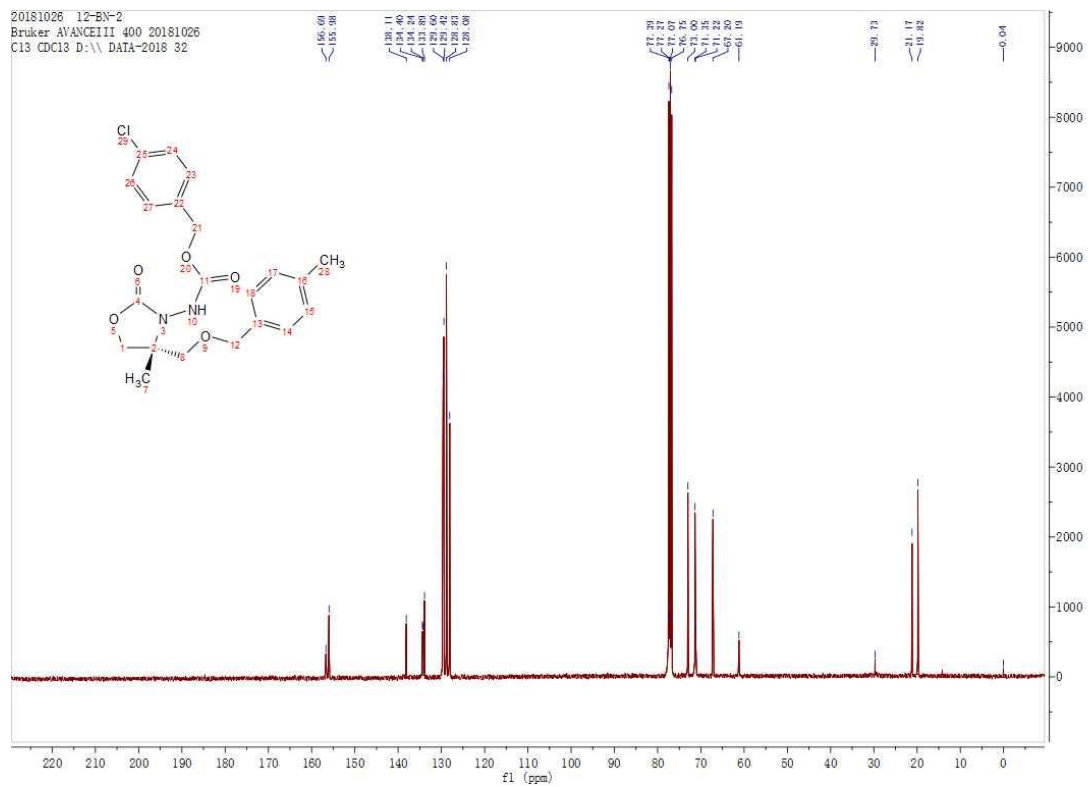

5b-p-ClBn

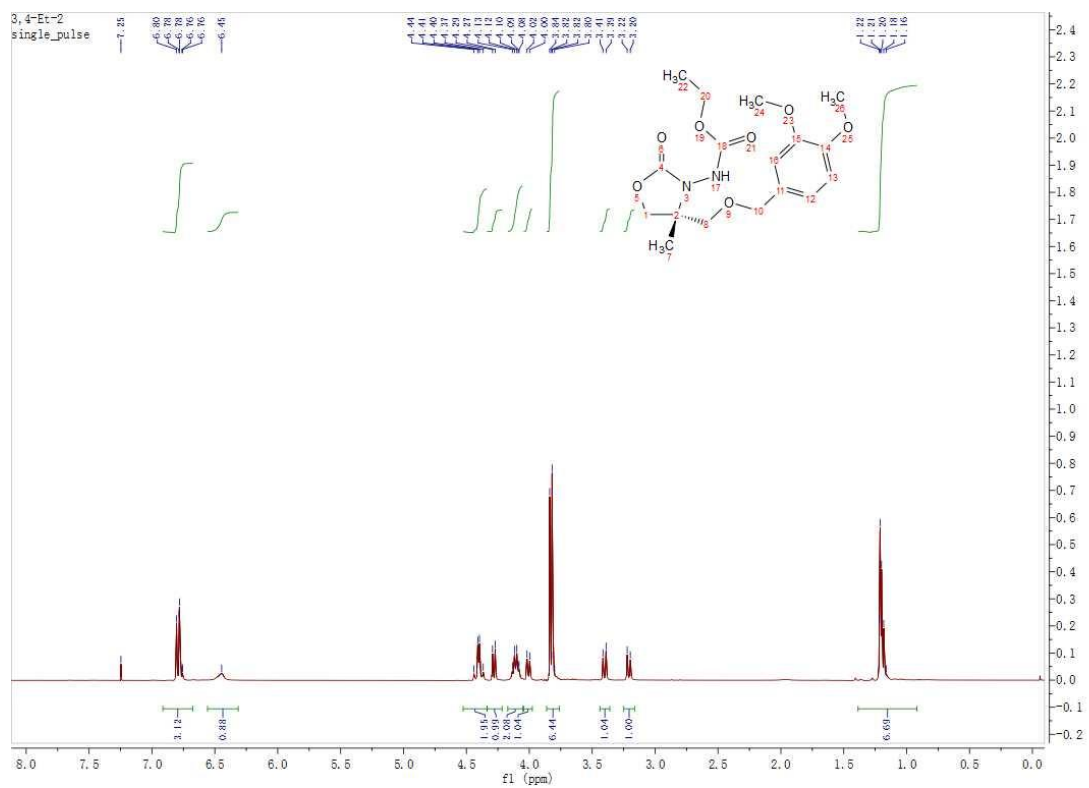



20181106 XQ-3,4-ET-2  
Bruker AVANCEIII 400 20181106  
C13 CDC13 D:\ DATA-2018 26

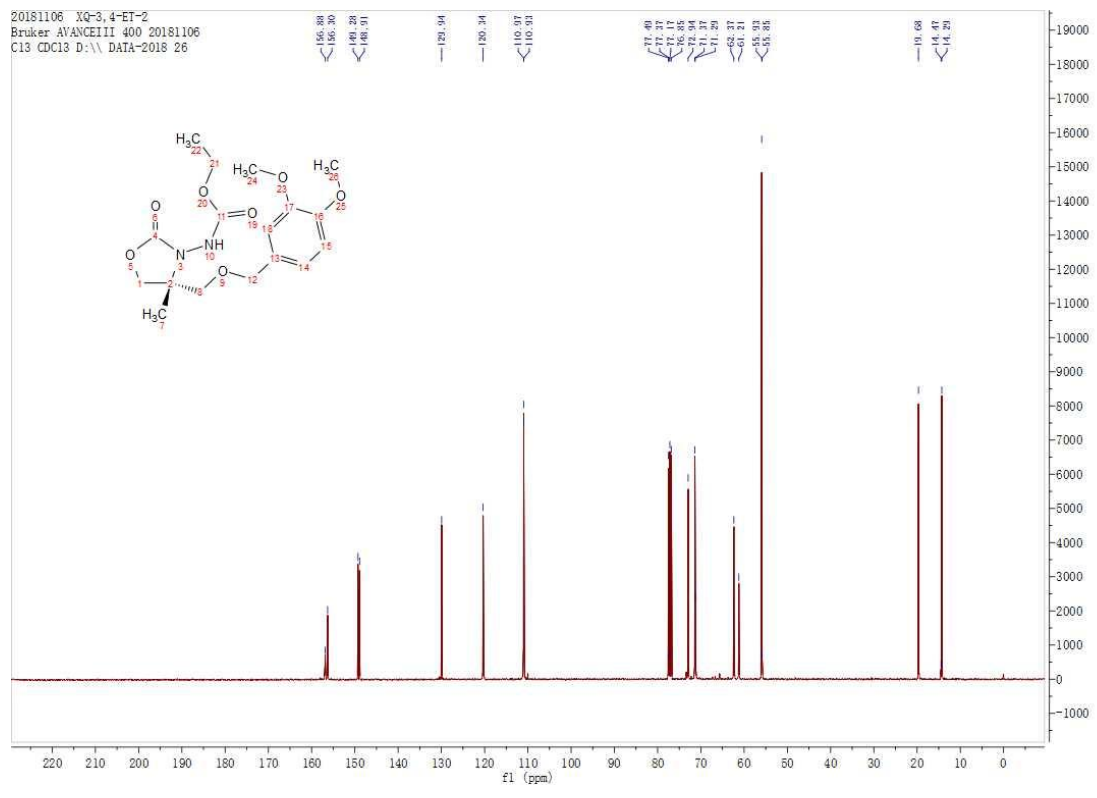

5c-Et

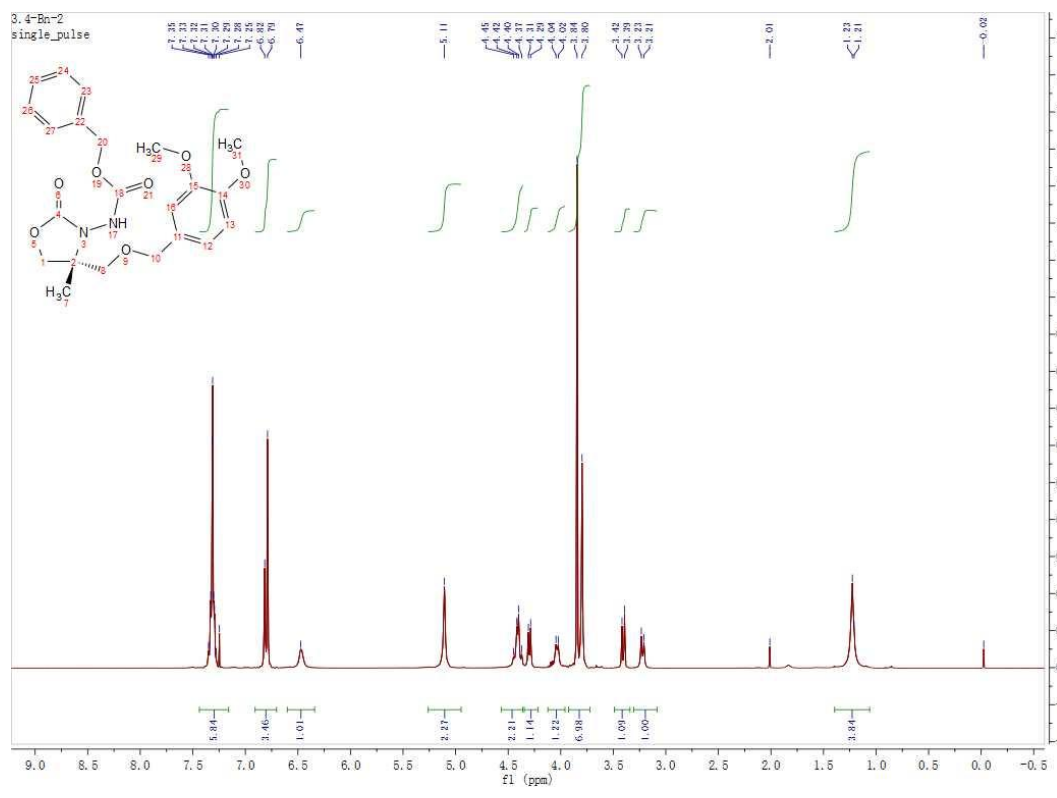

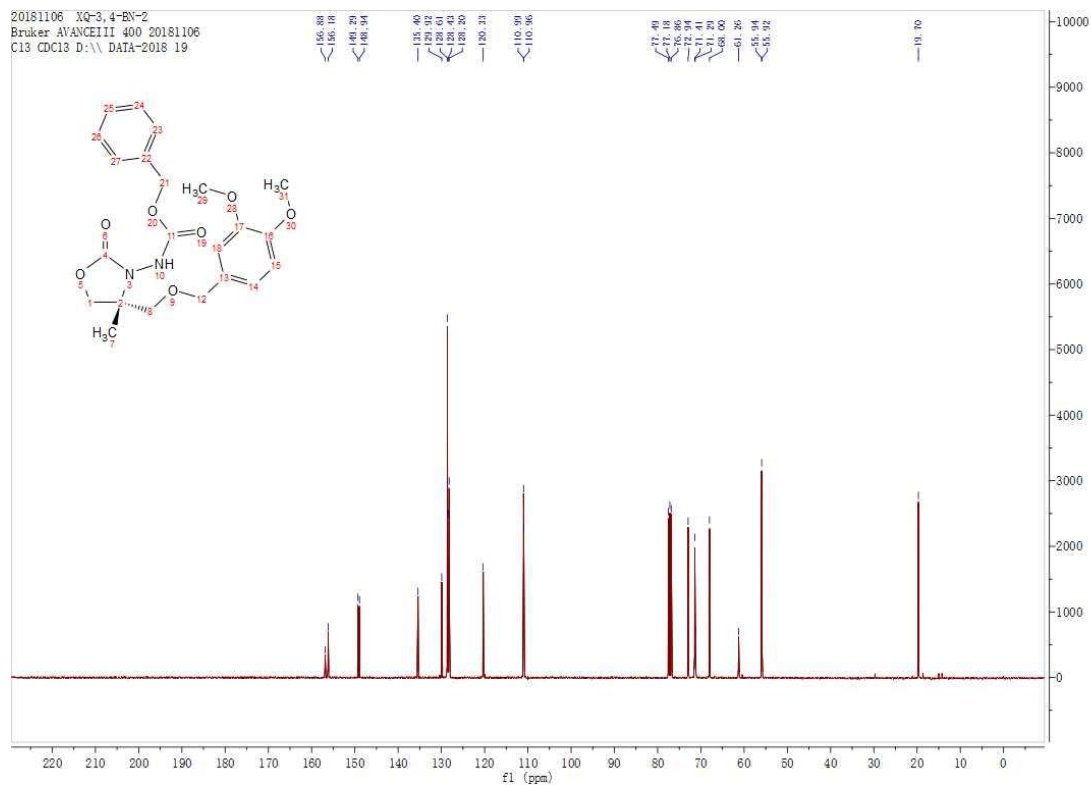

5c-Bn

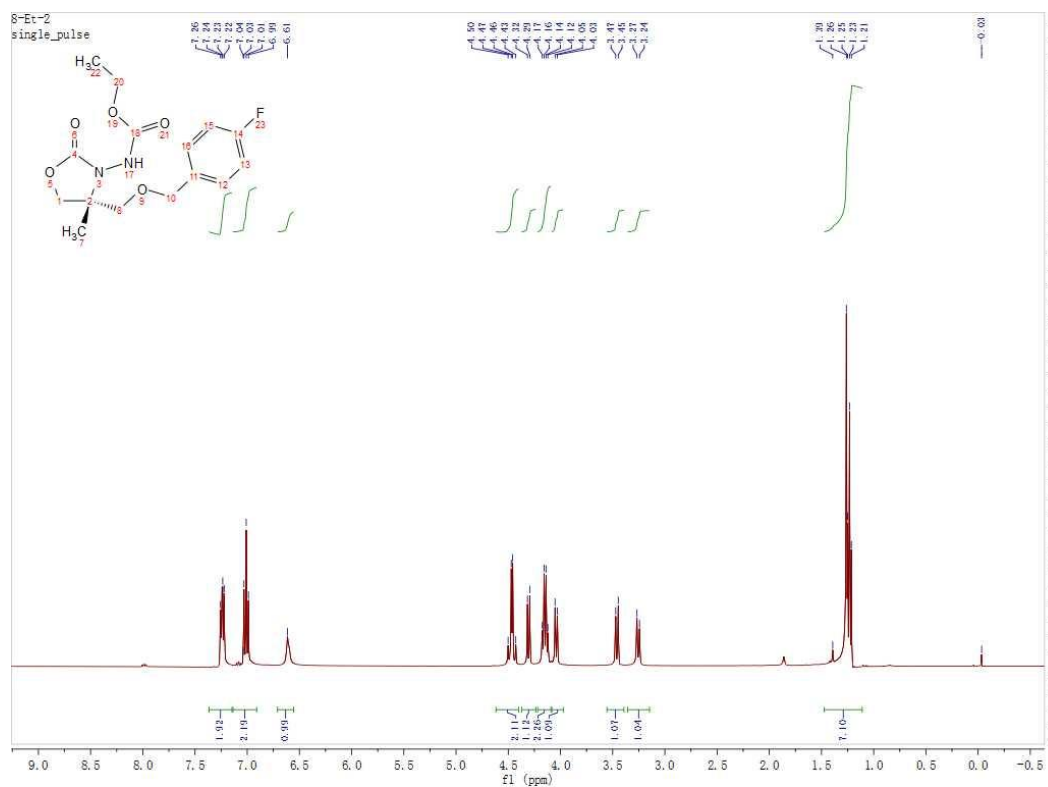

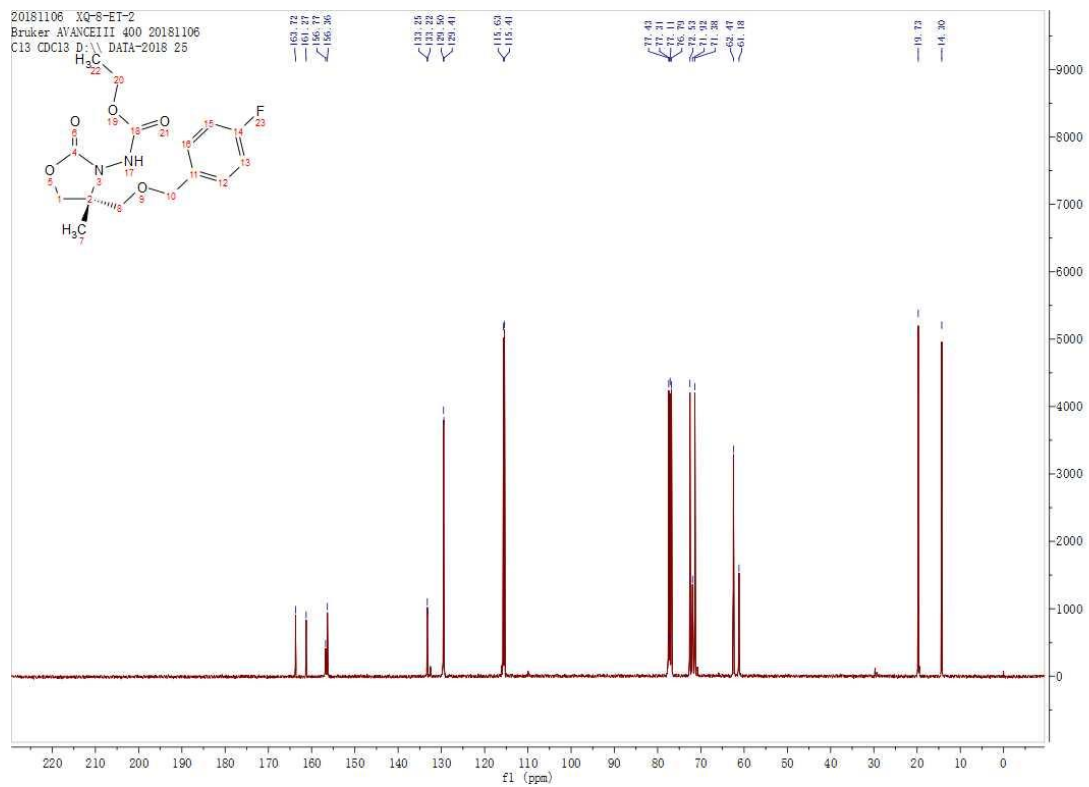

5d-Et

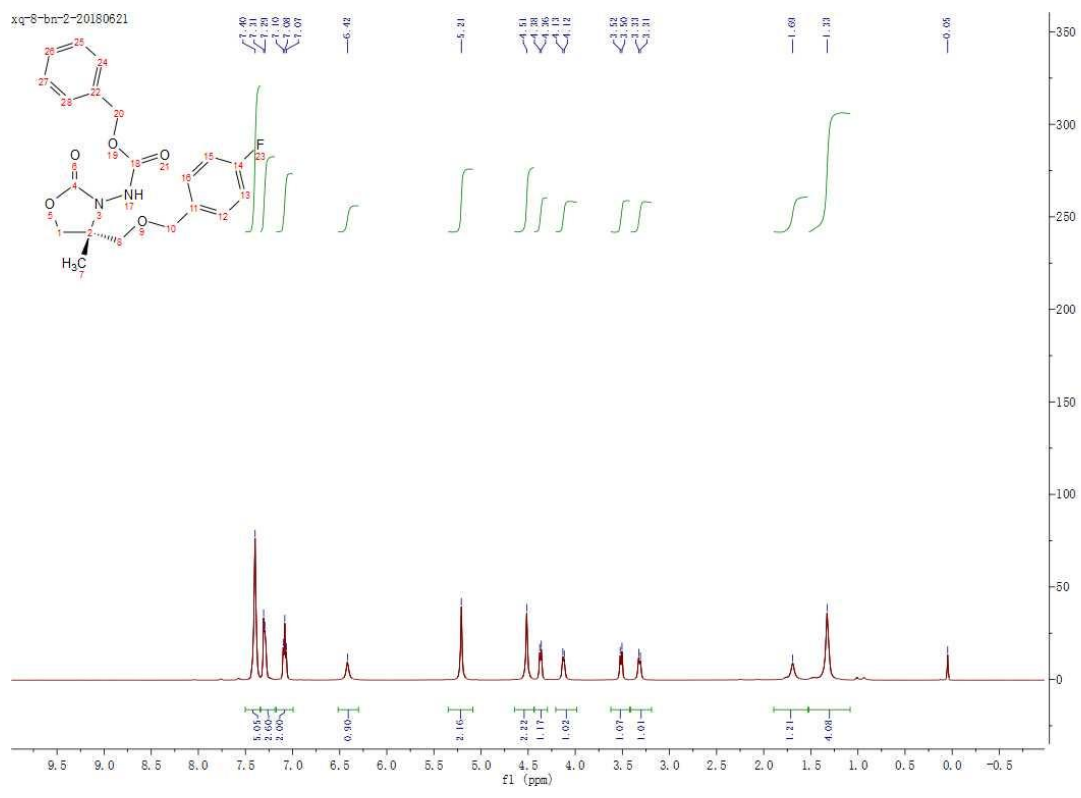

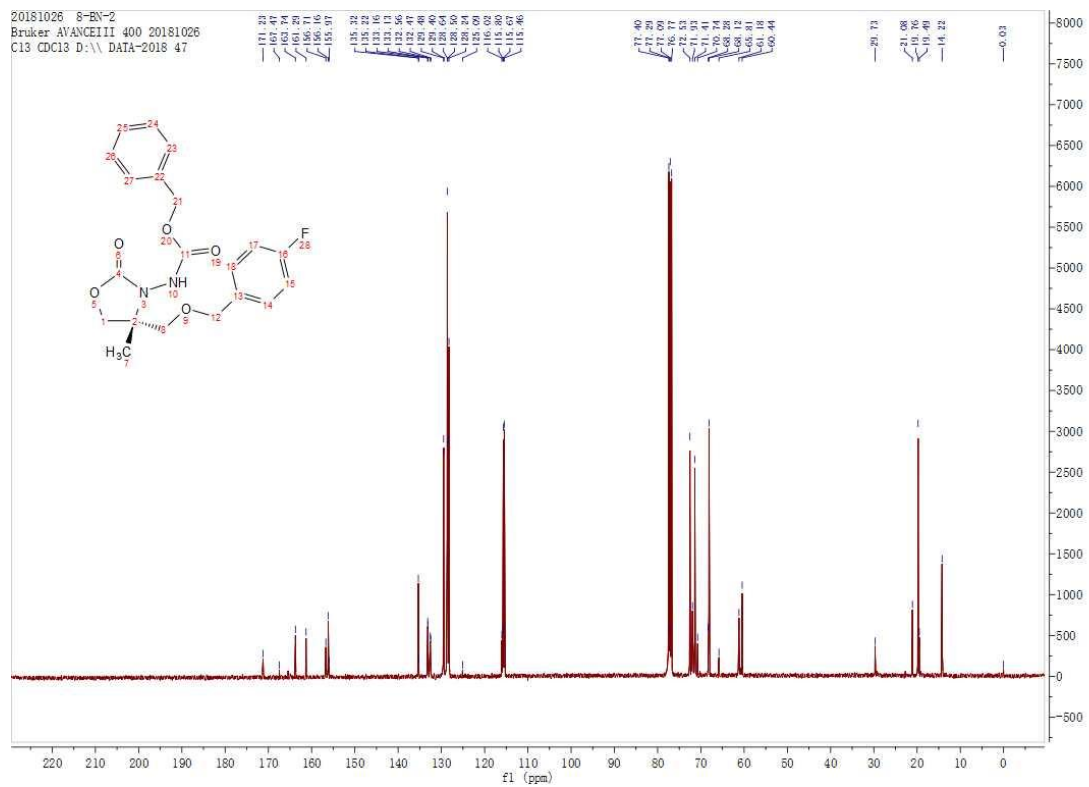

5d-Bn

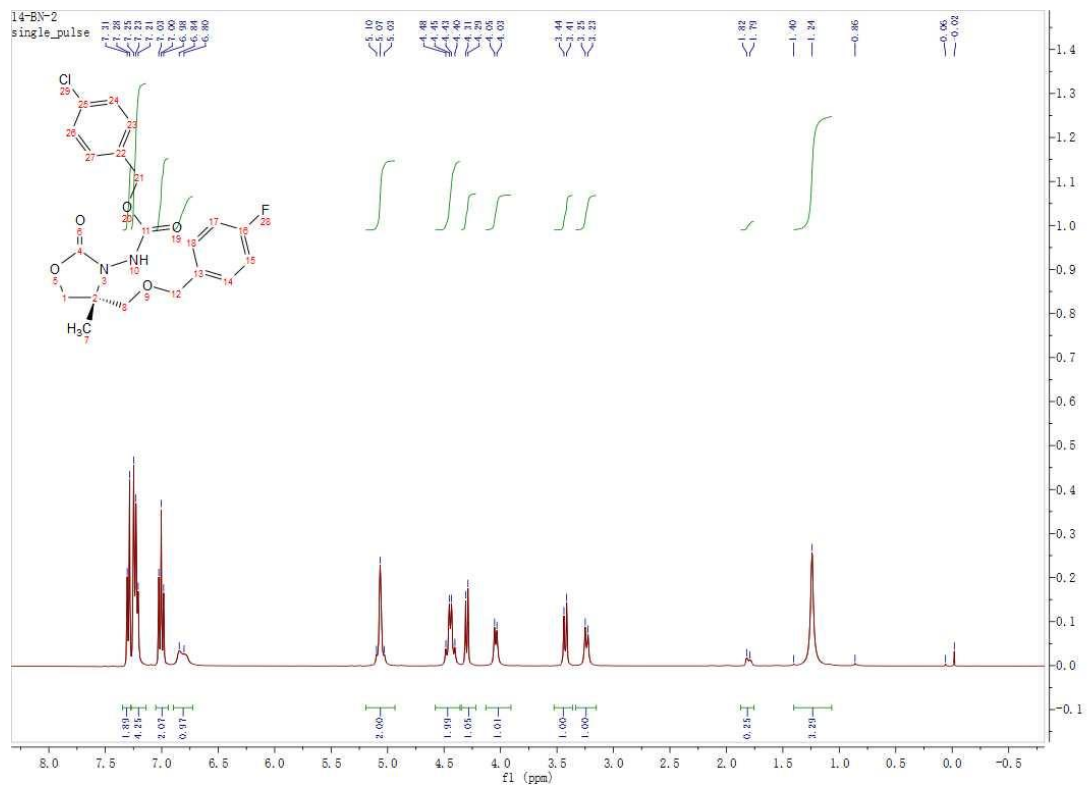

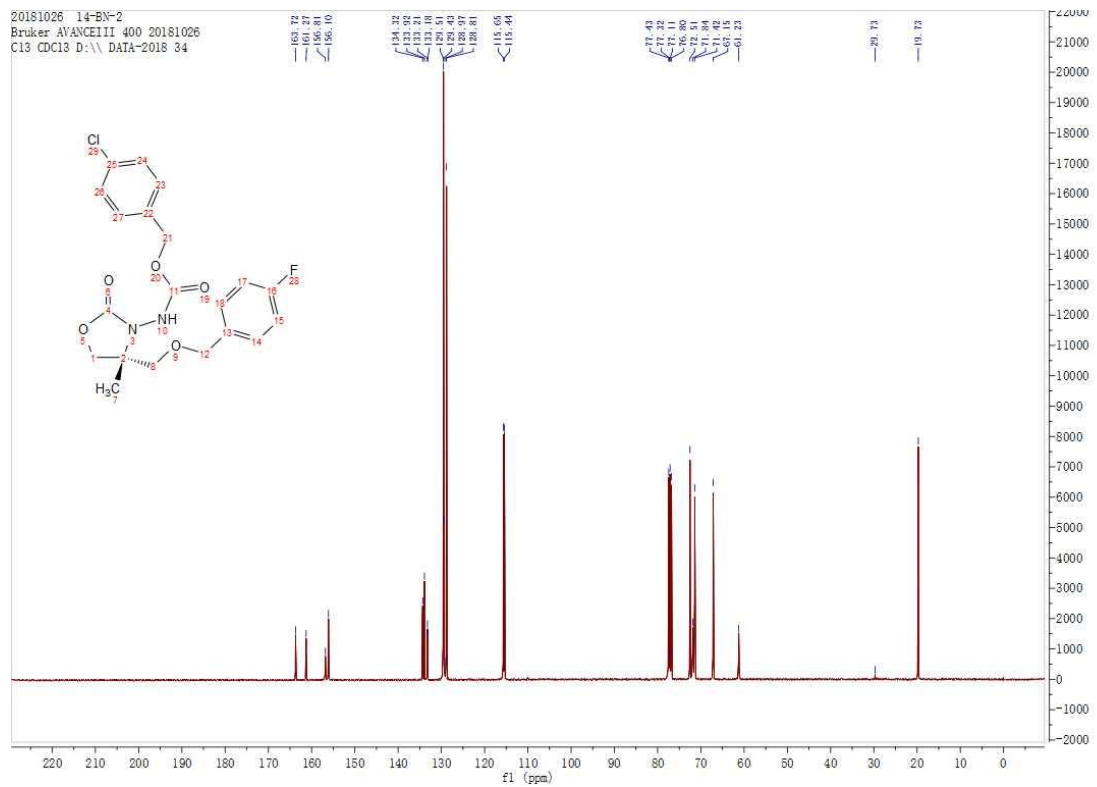

5d-p-ClBn

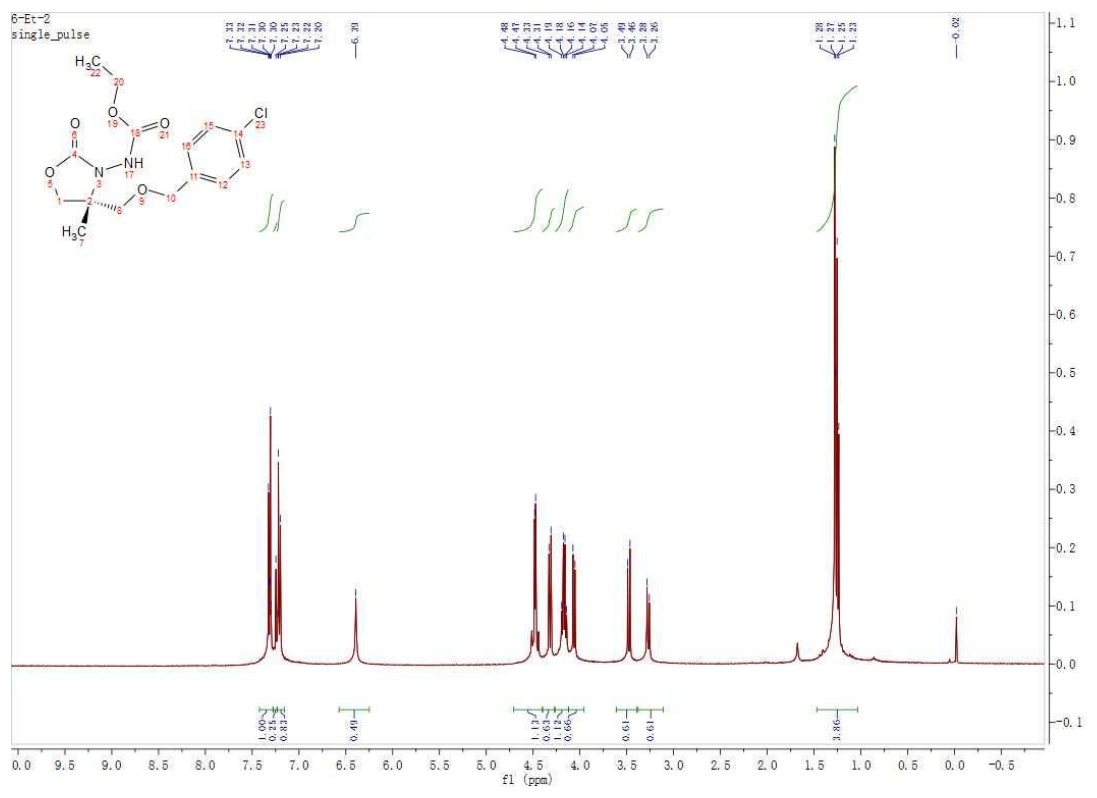

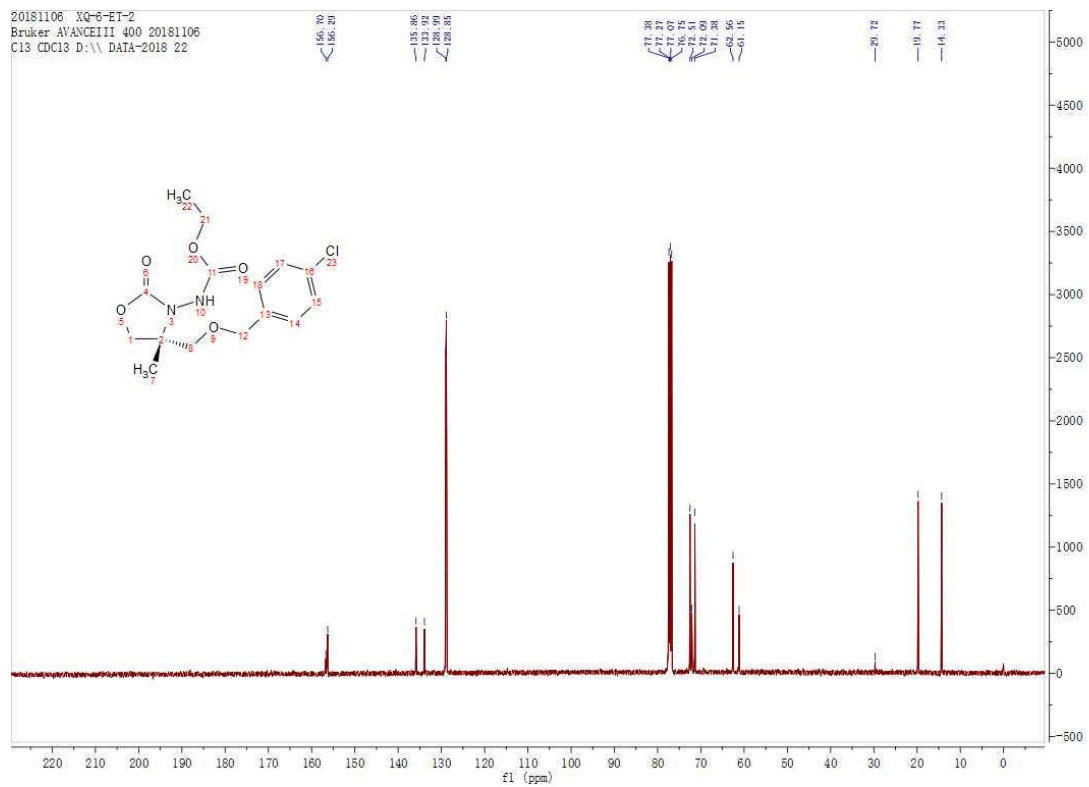

5e-Et

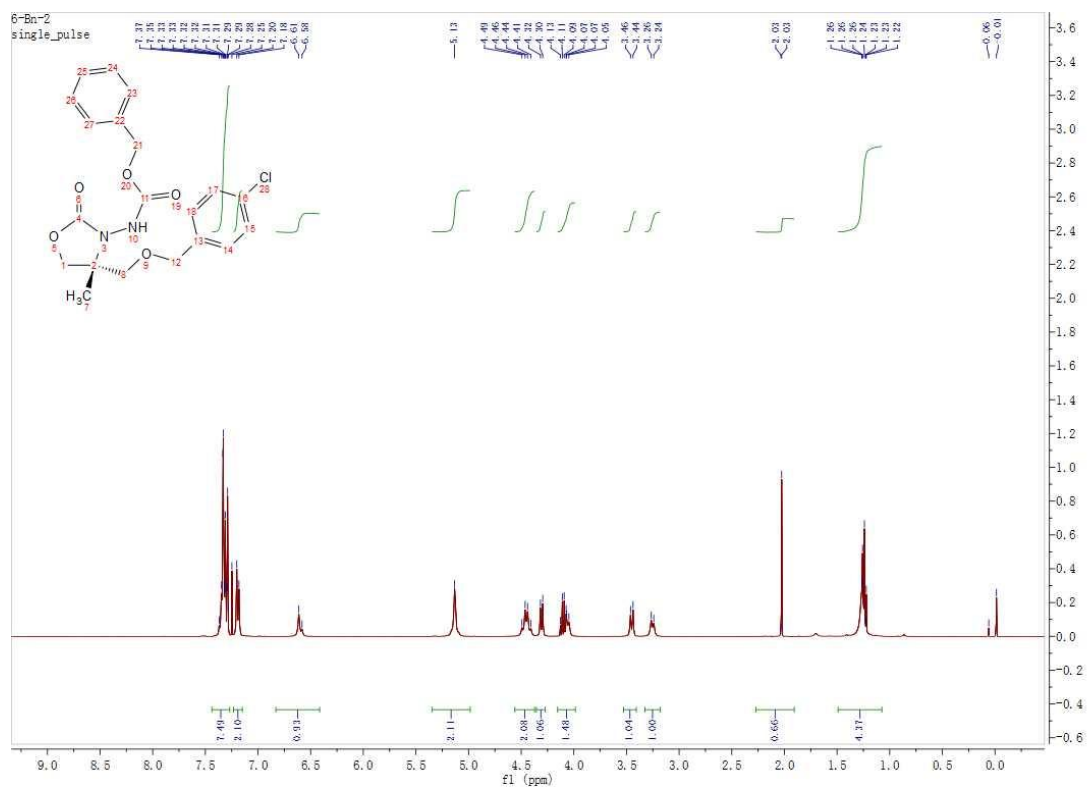

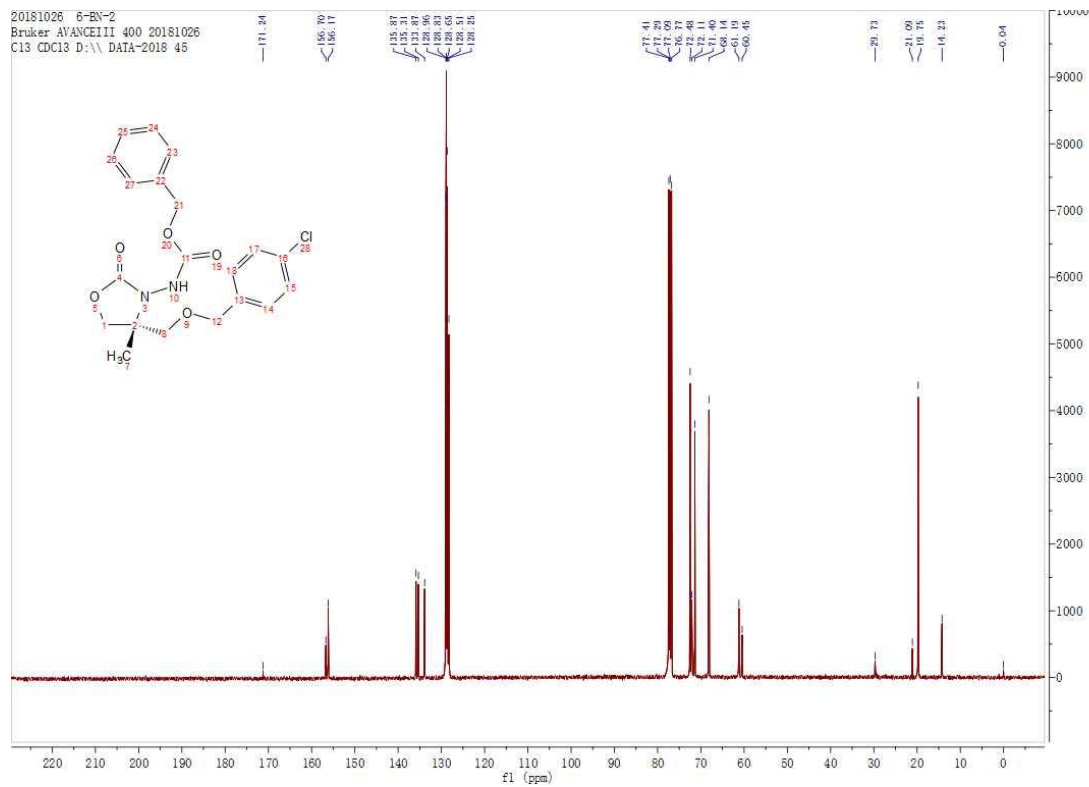

5e-Bn

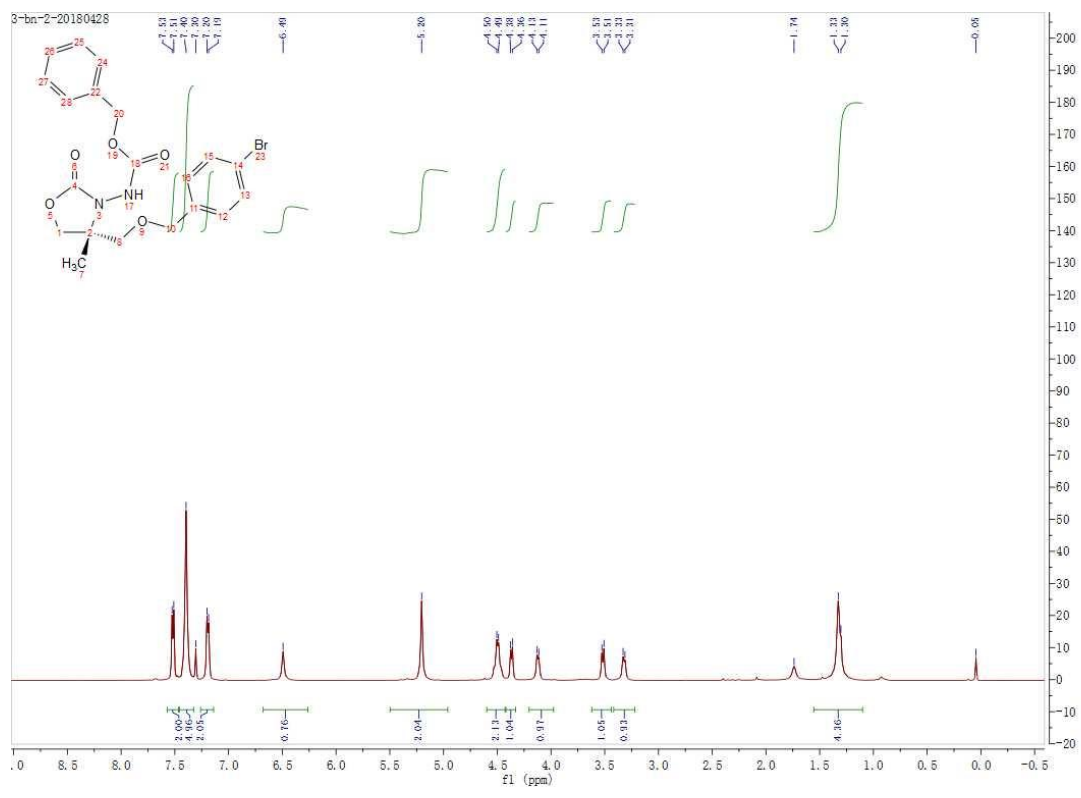

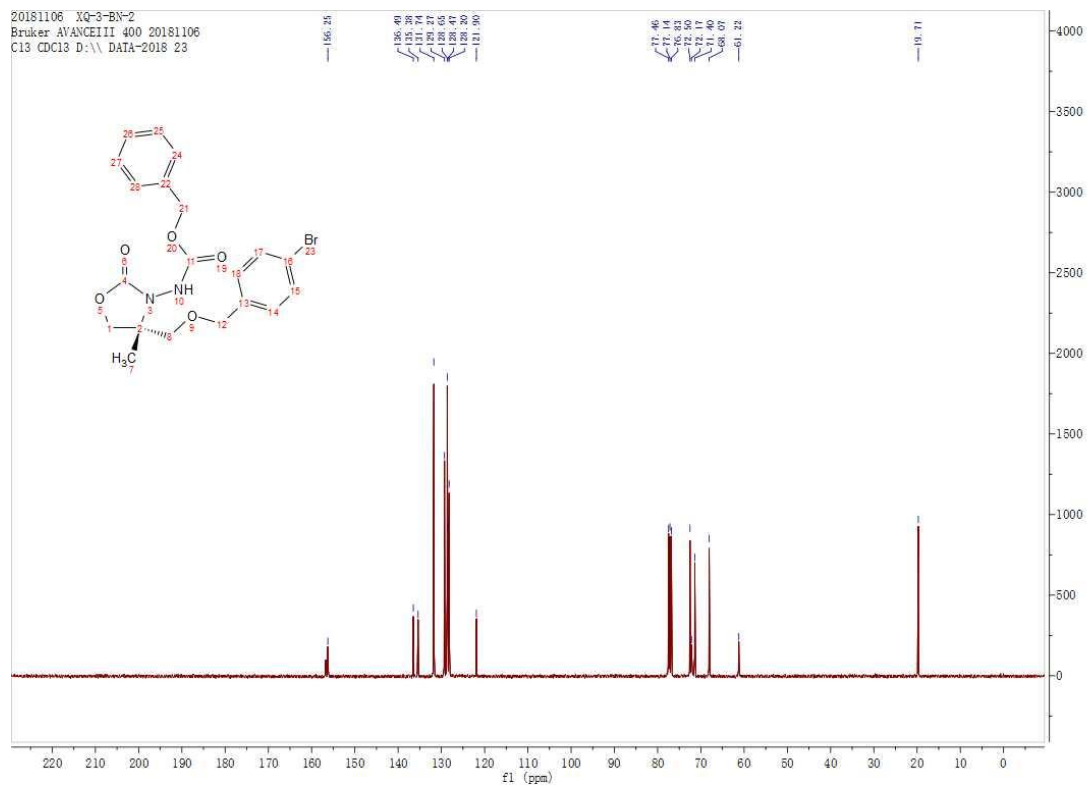

5f-Bn

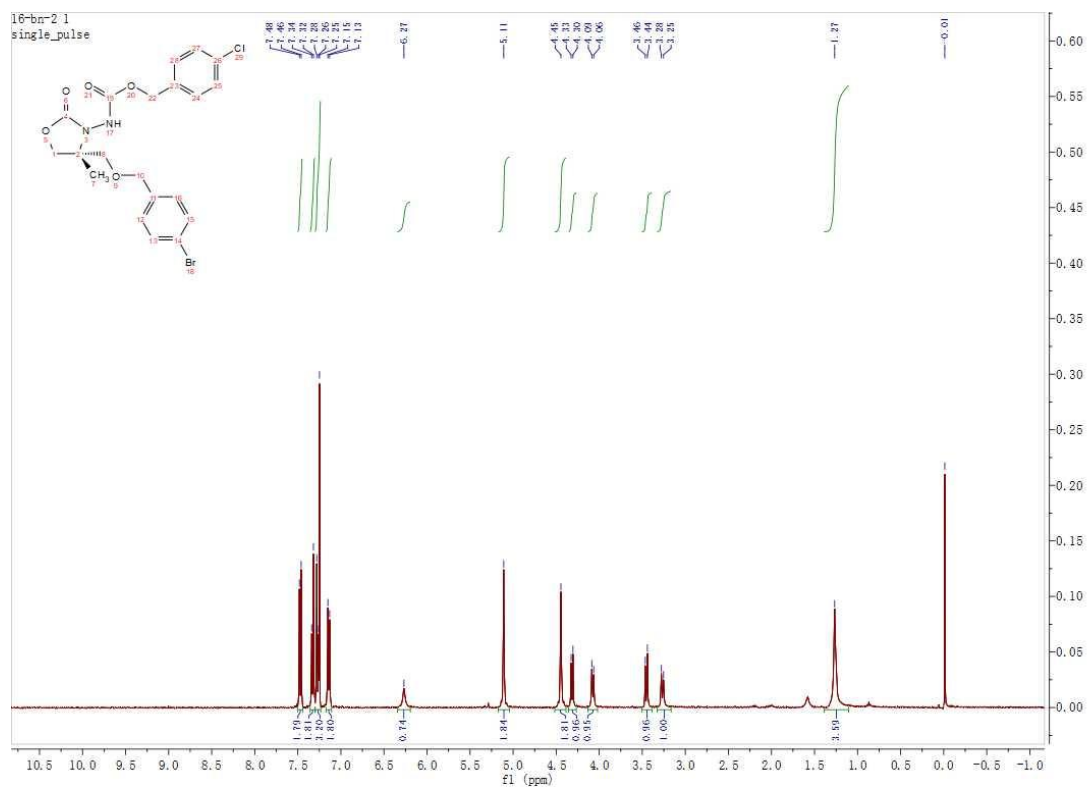

5f-p-ClBn



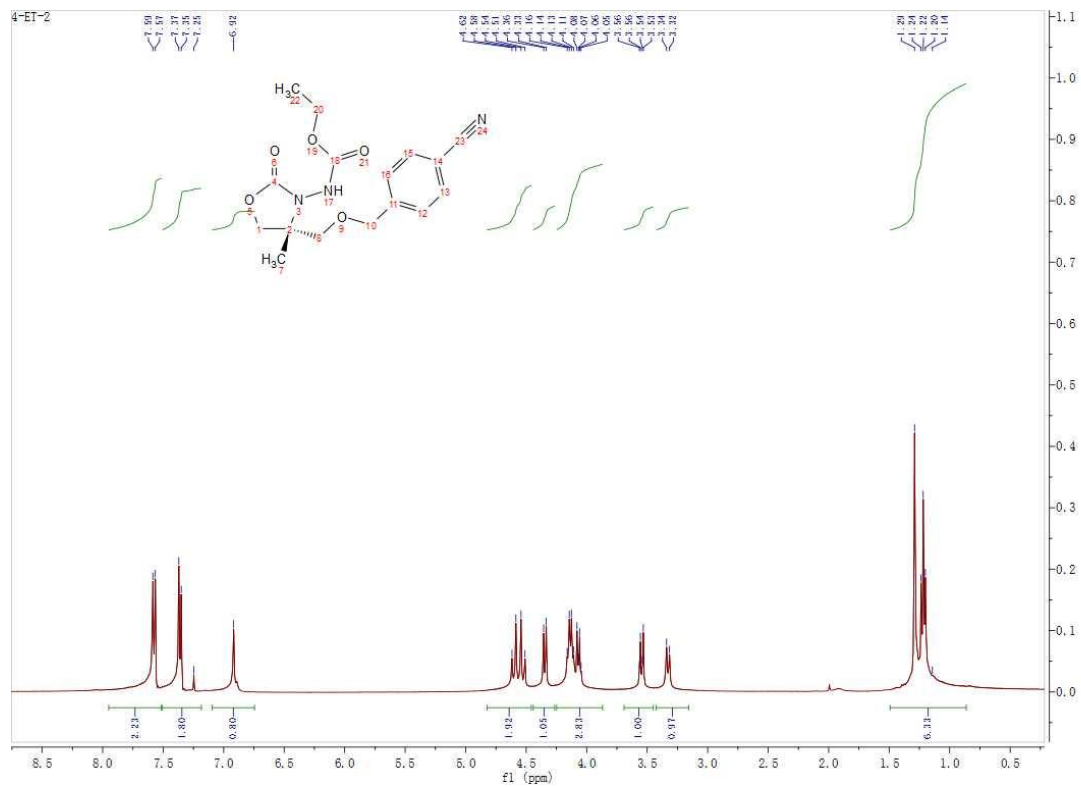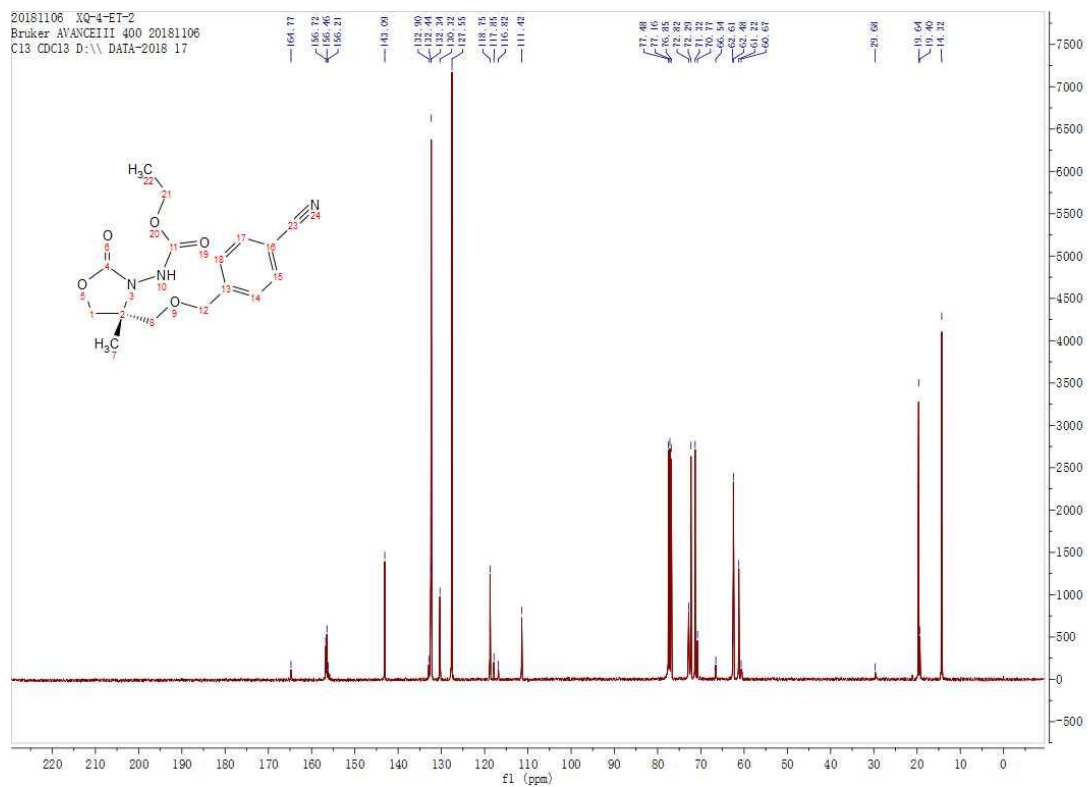

5g-Et

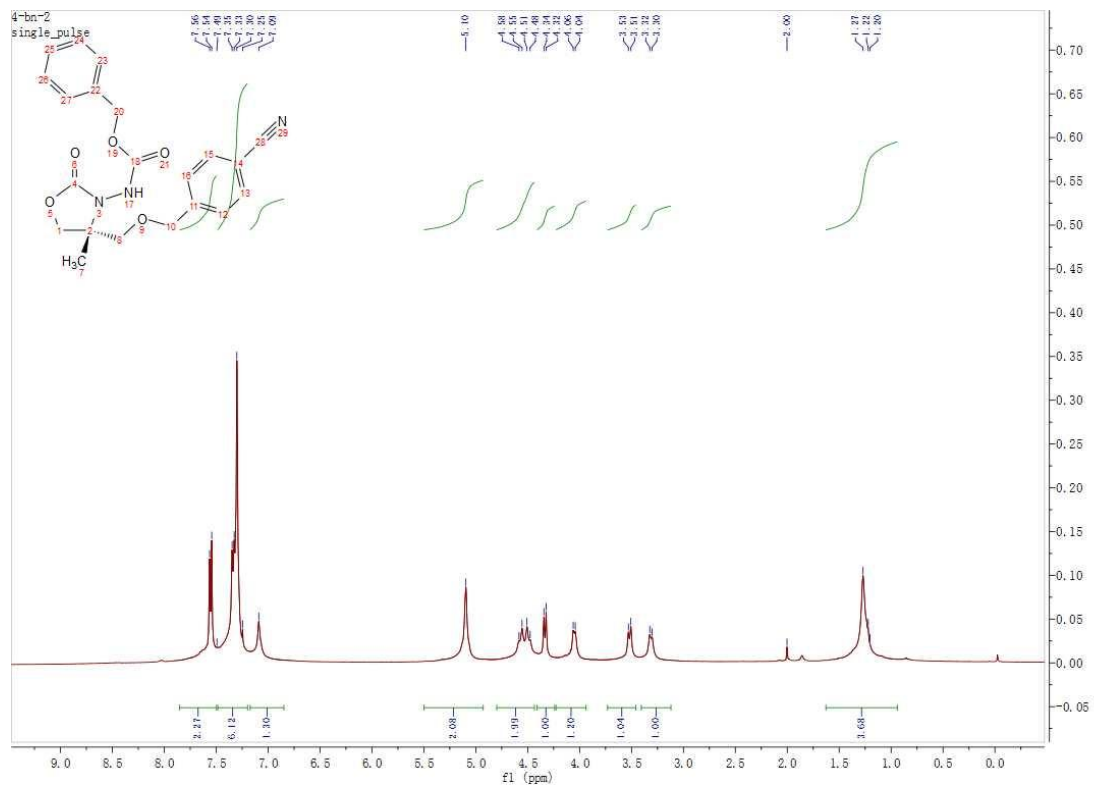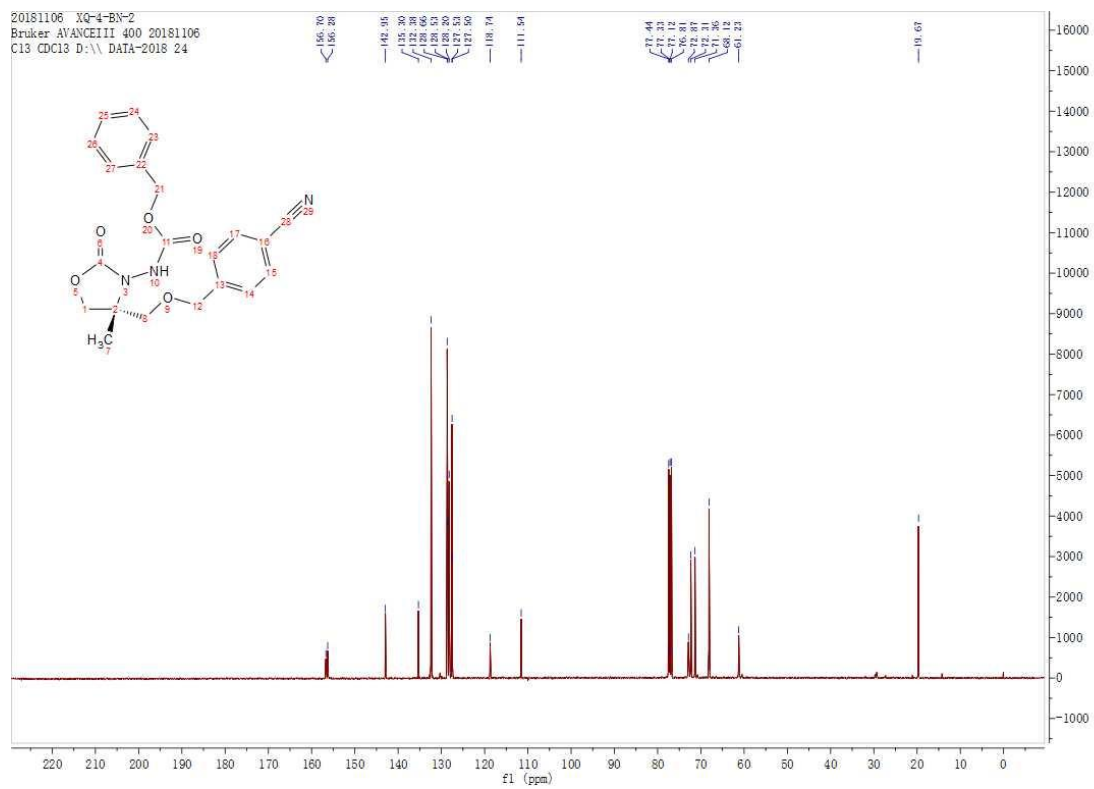

5g-Bn



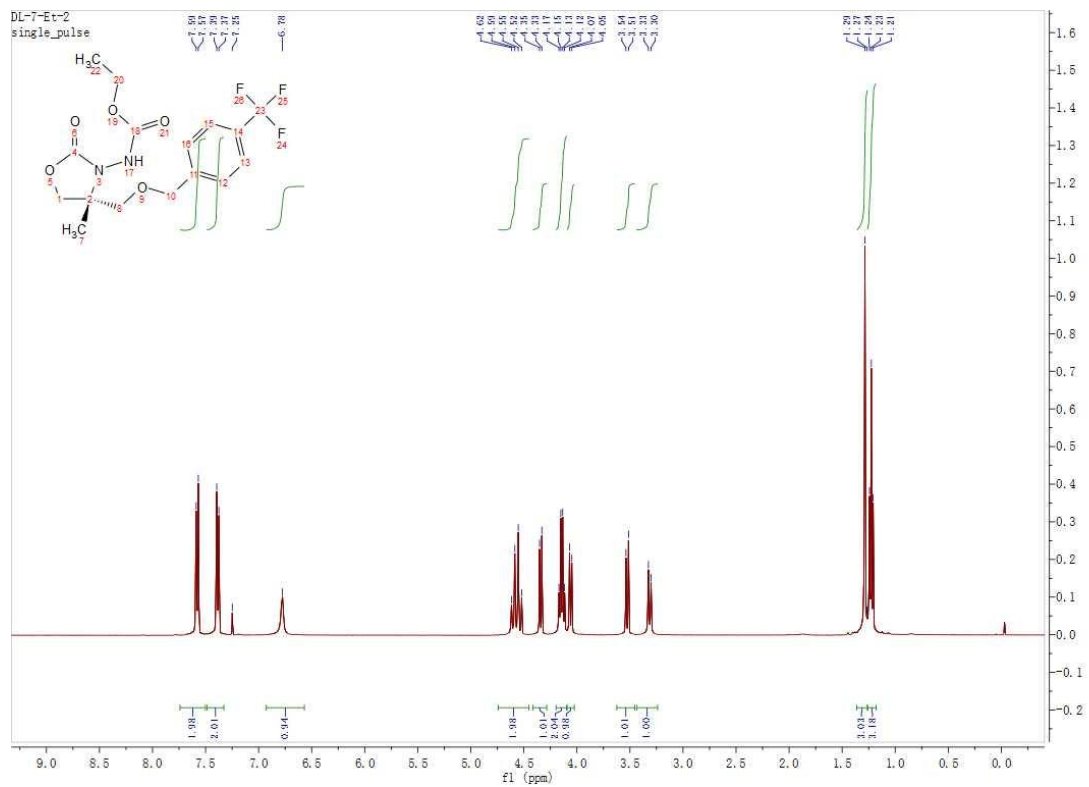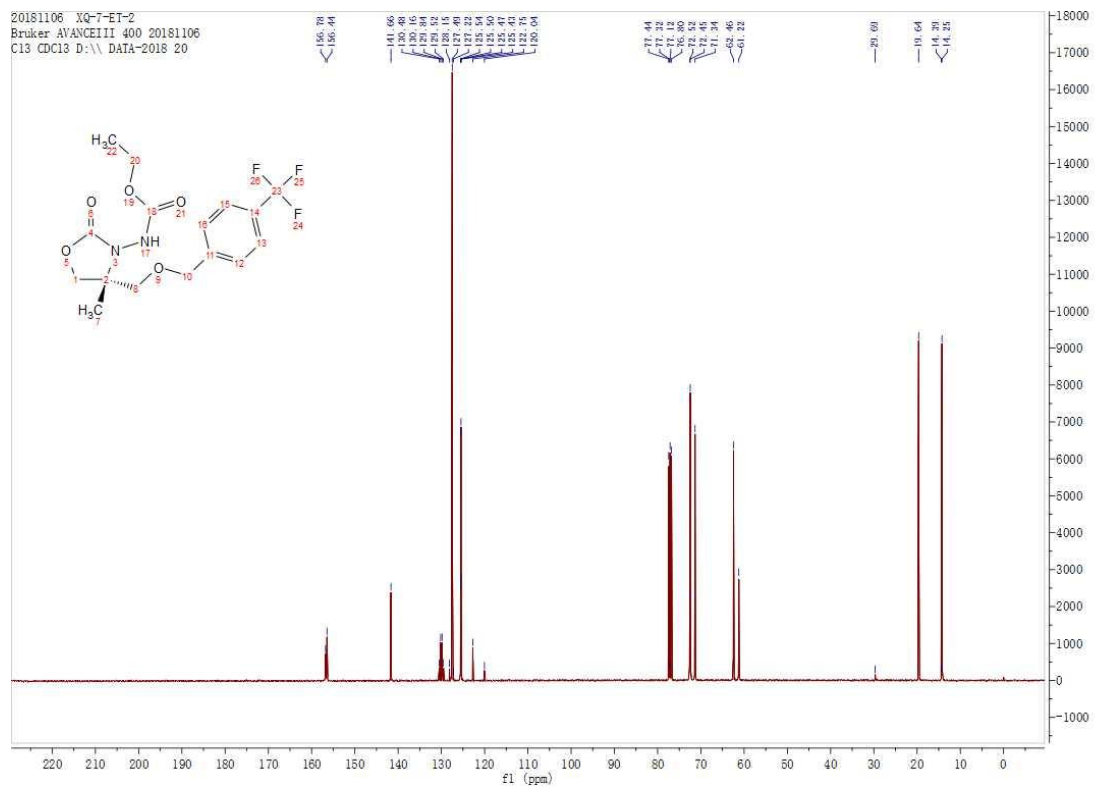

5h-Et

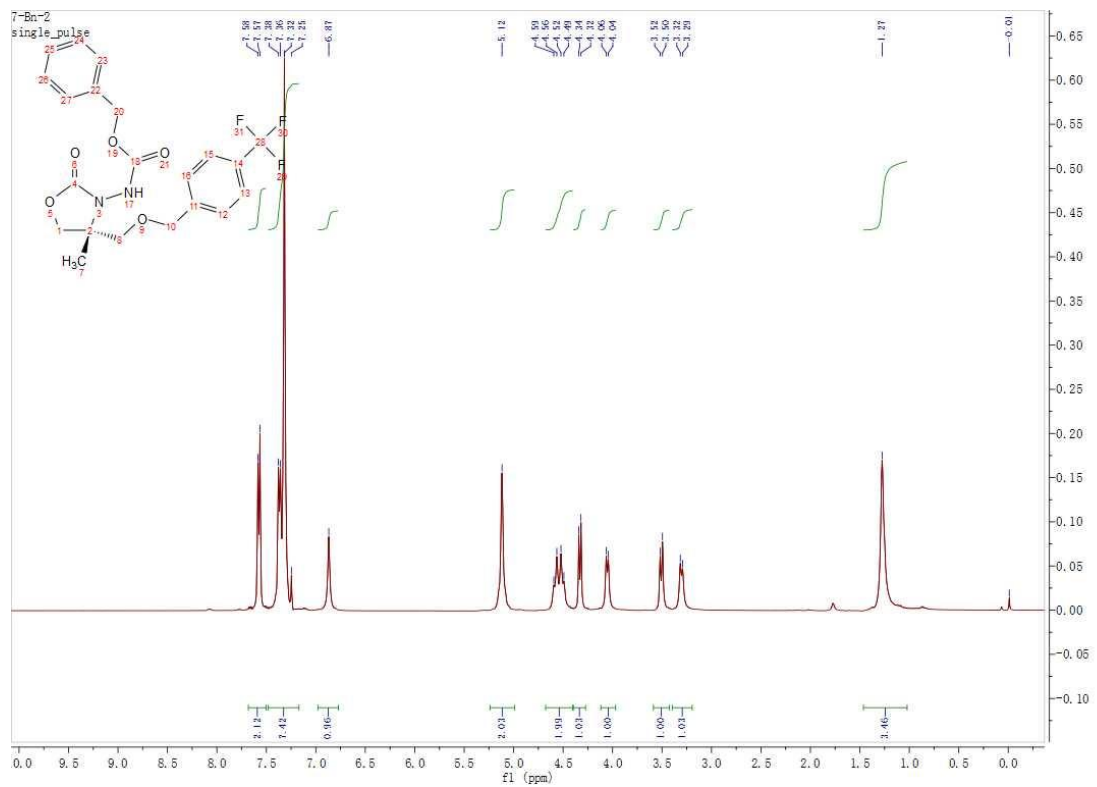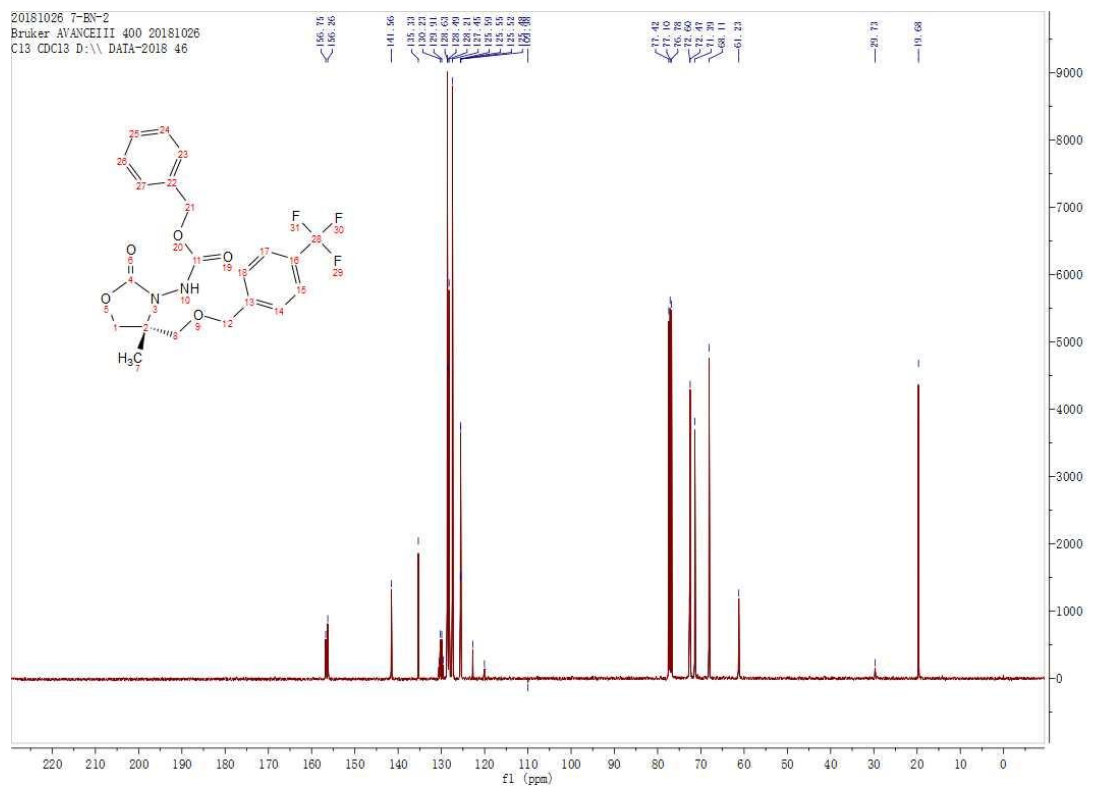

5h-Bn

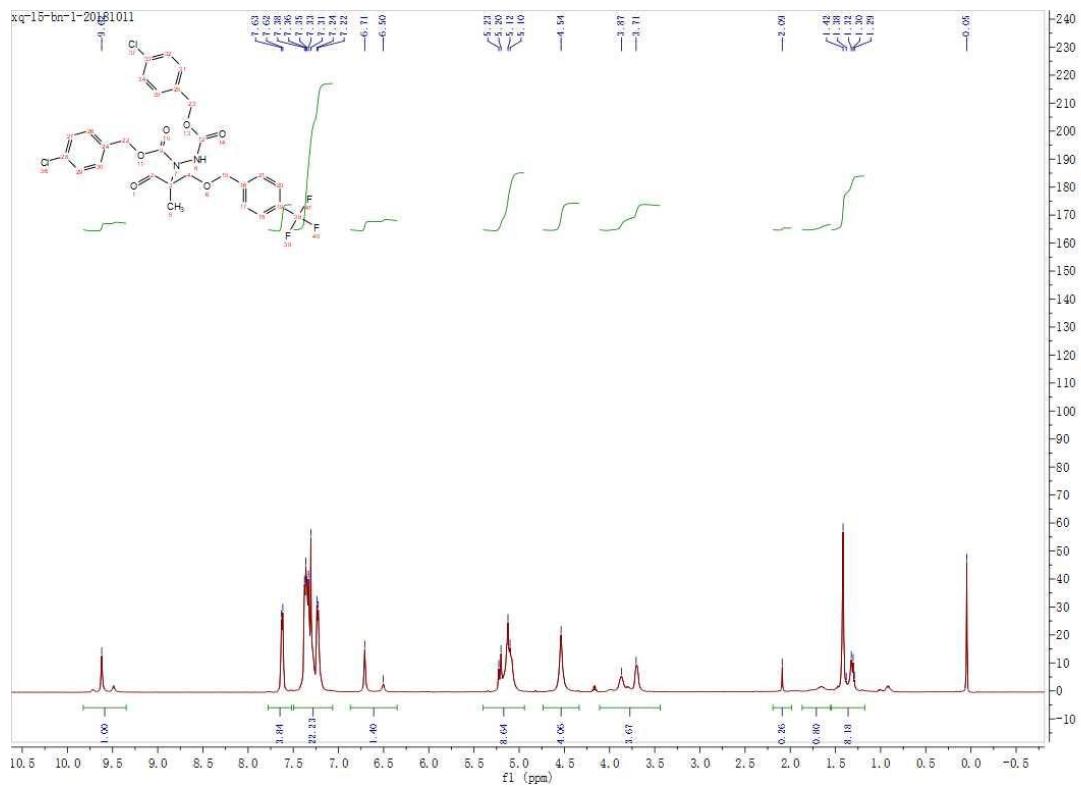

4h-p-ClBn

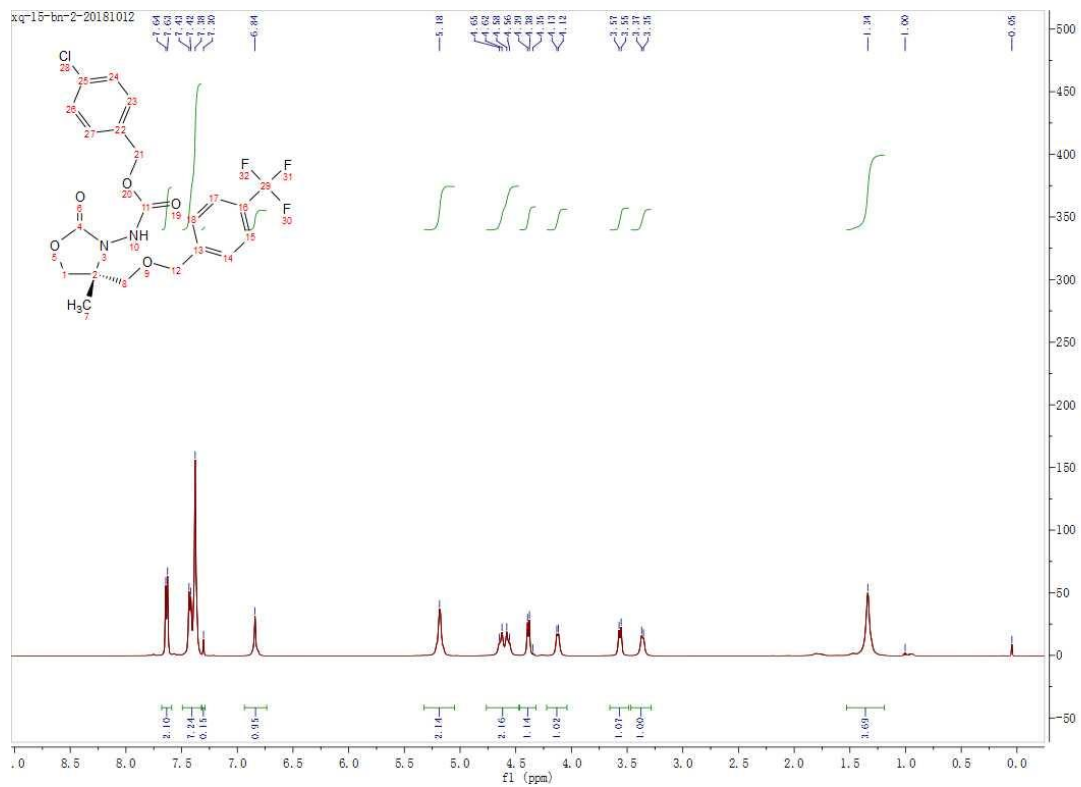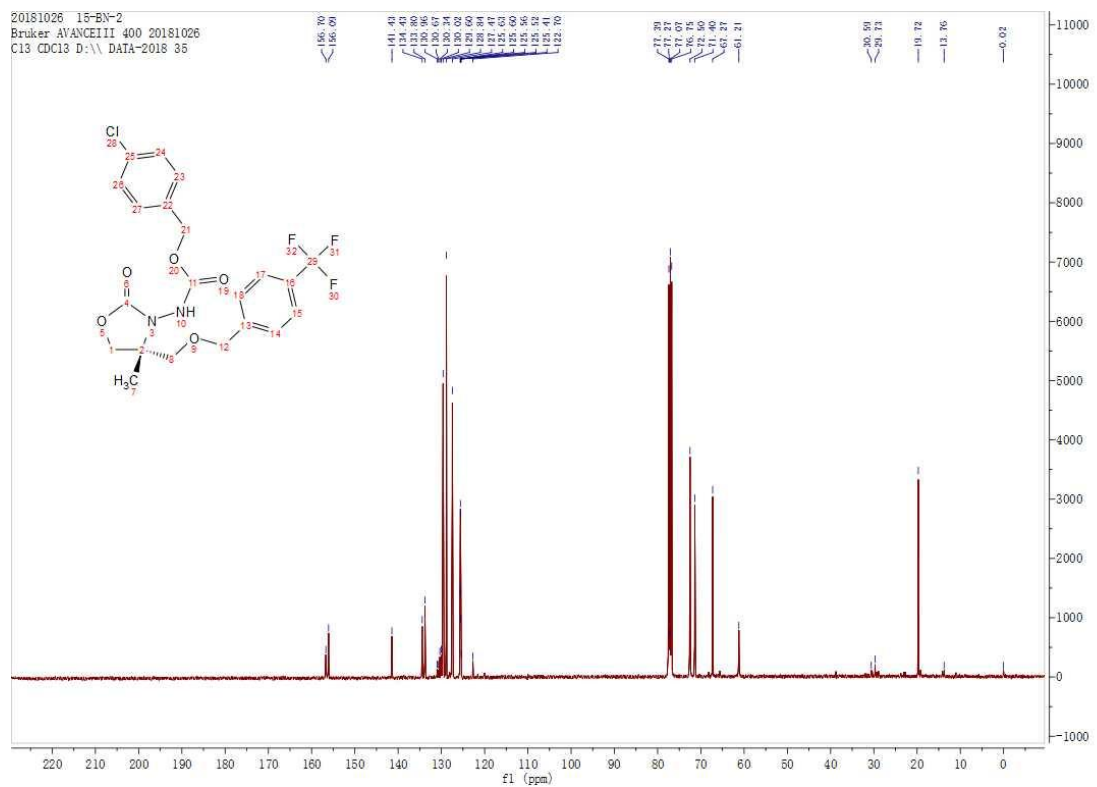

5h-p-ClBn

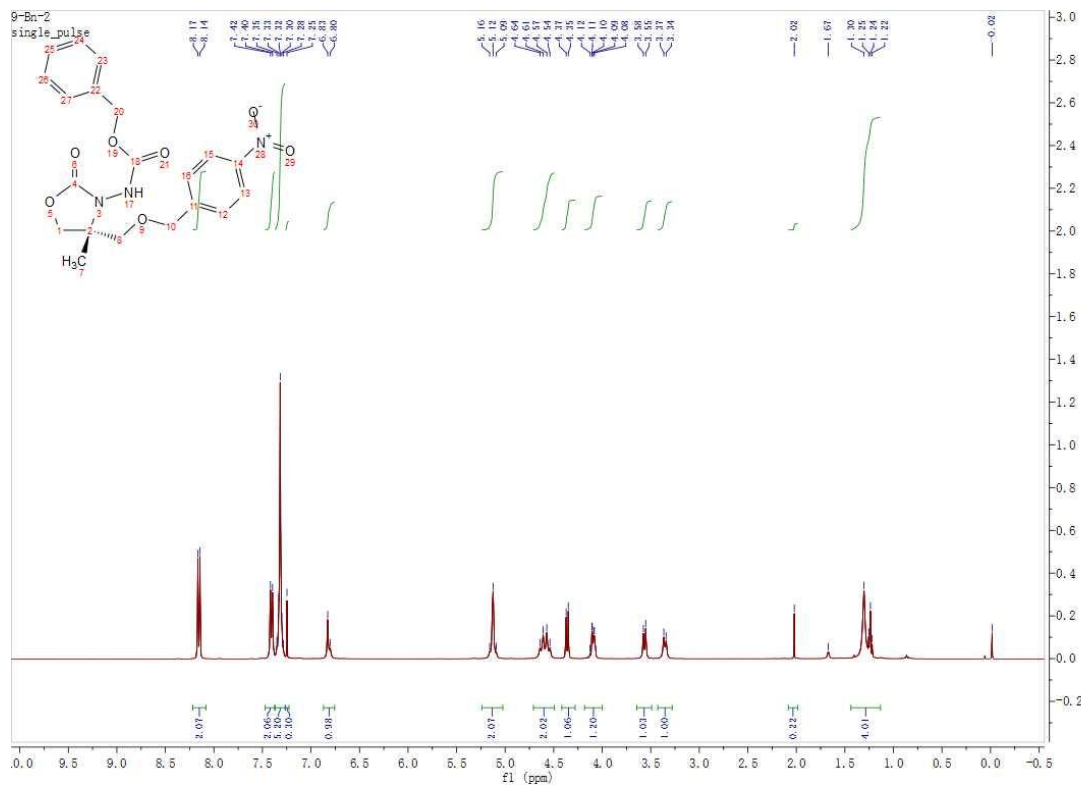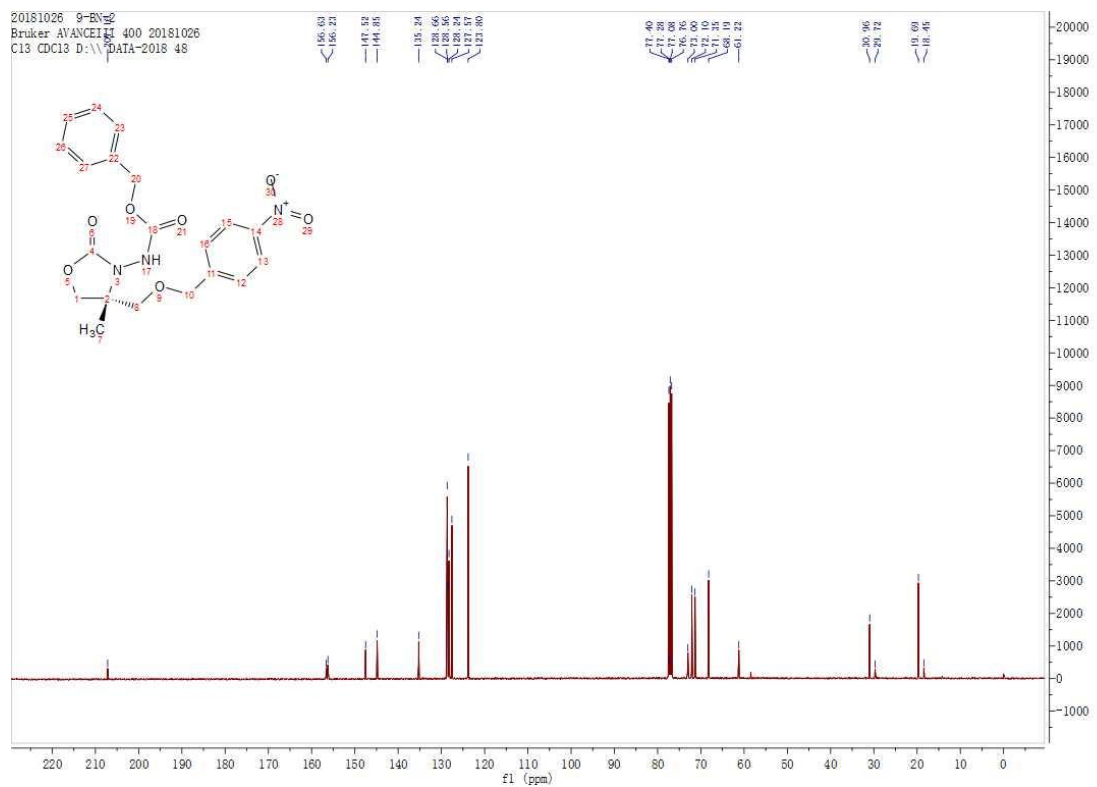

5i-Bn



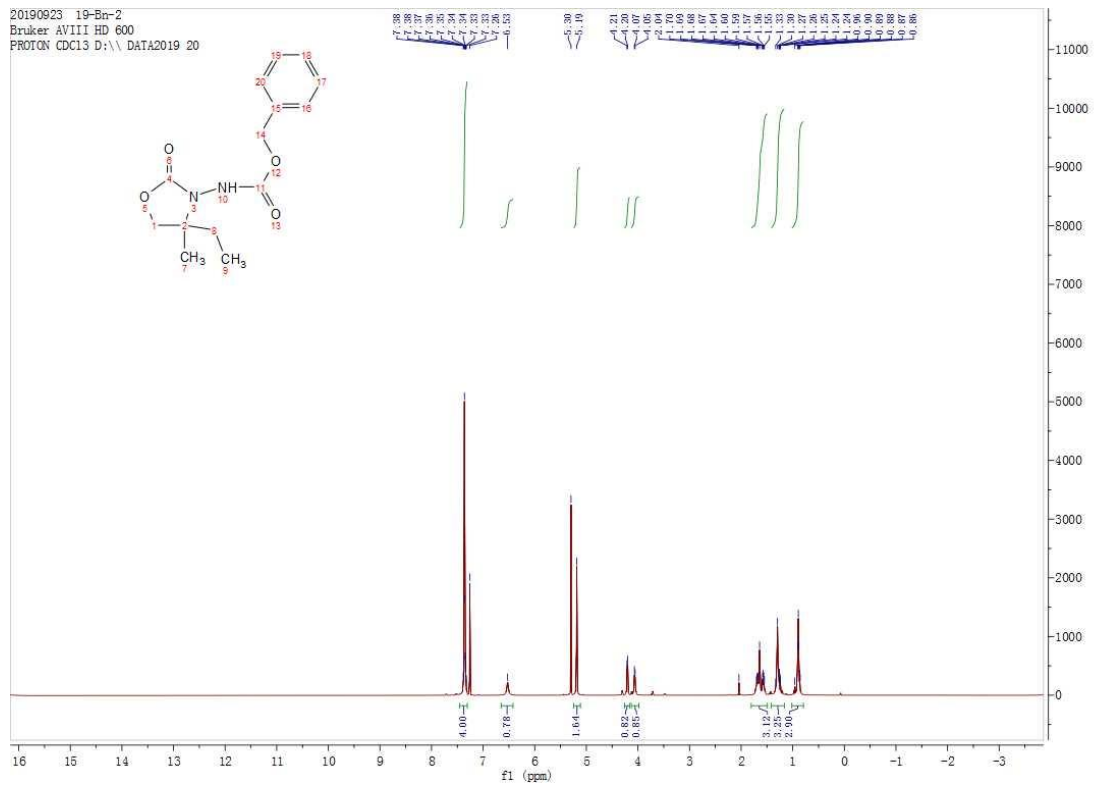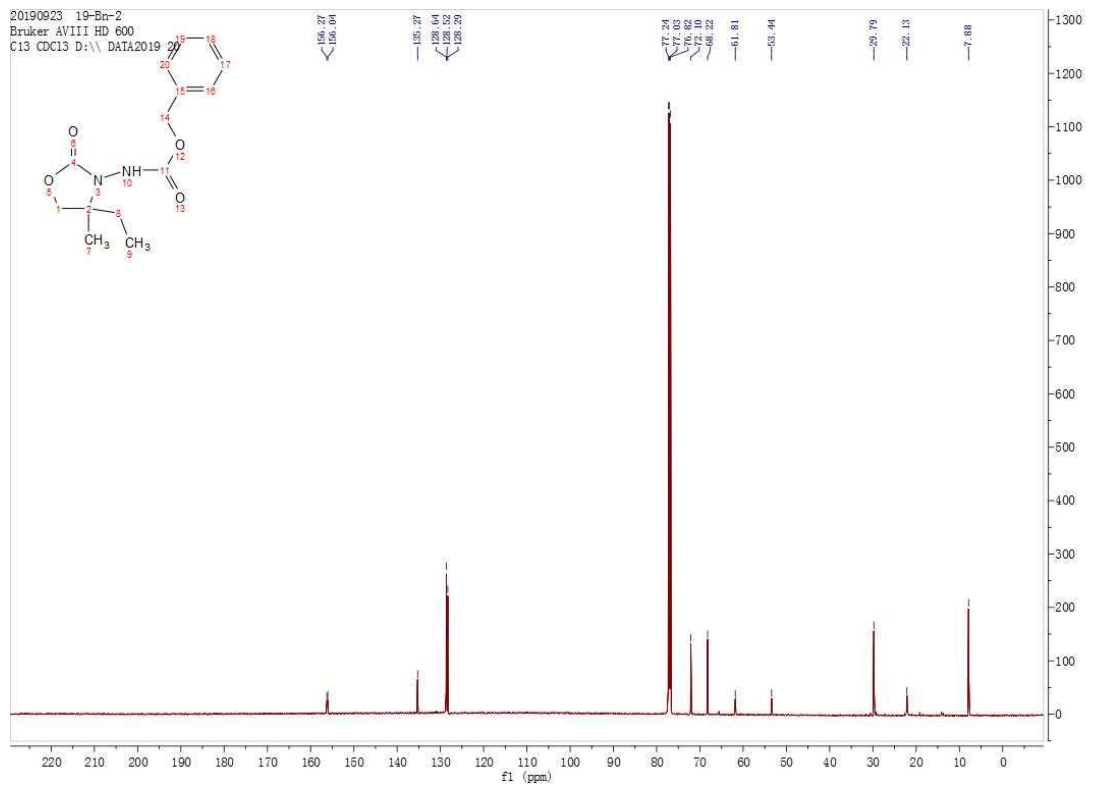

51-Bn

300M 1H-NMR XQ-2-76 IN CDCL3 081205

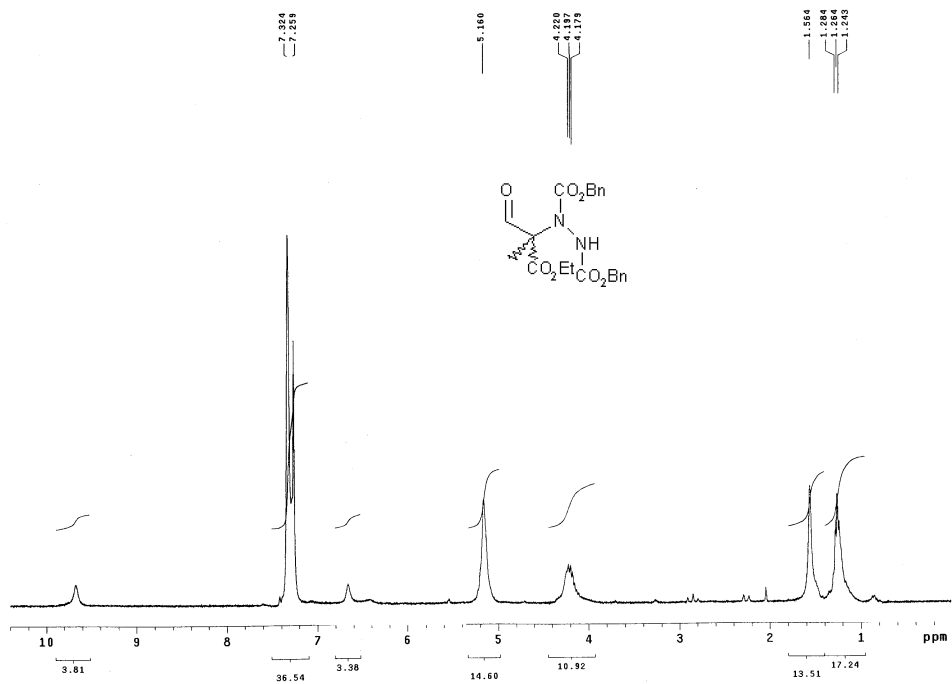

4m-Bn

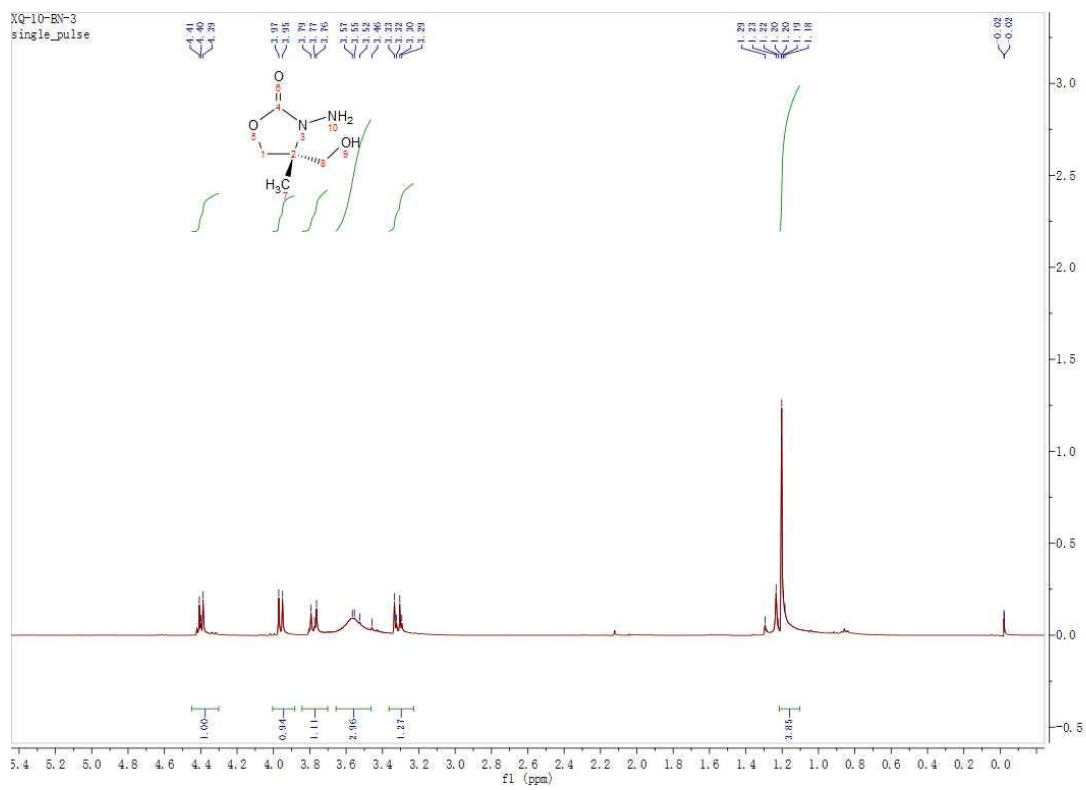

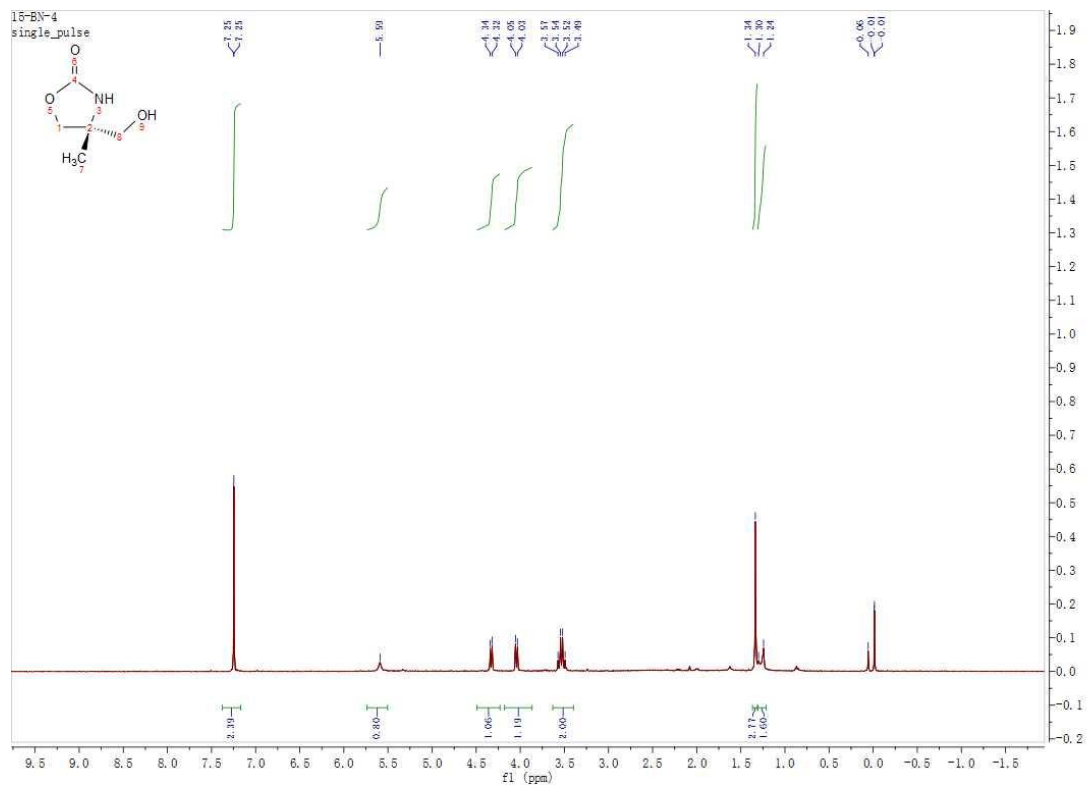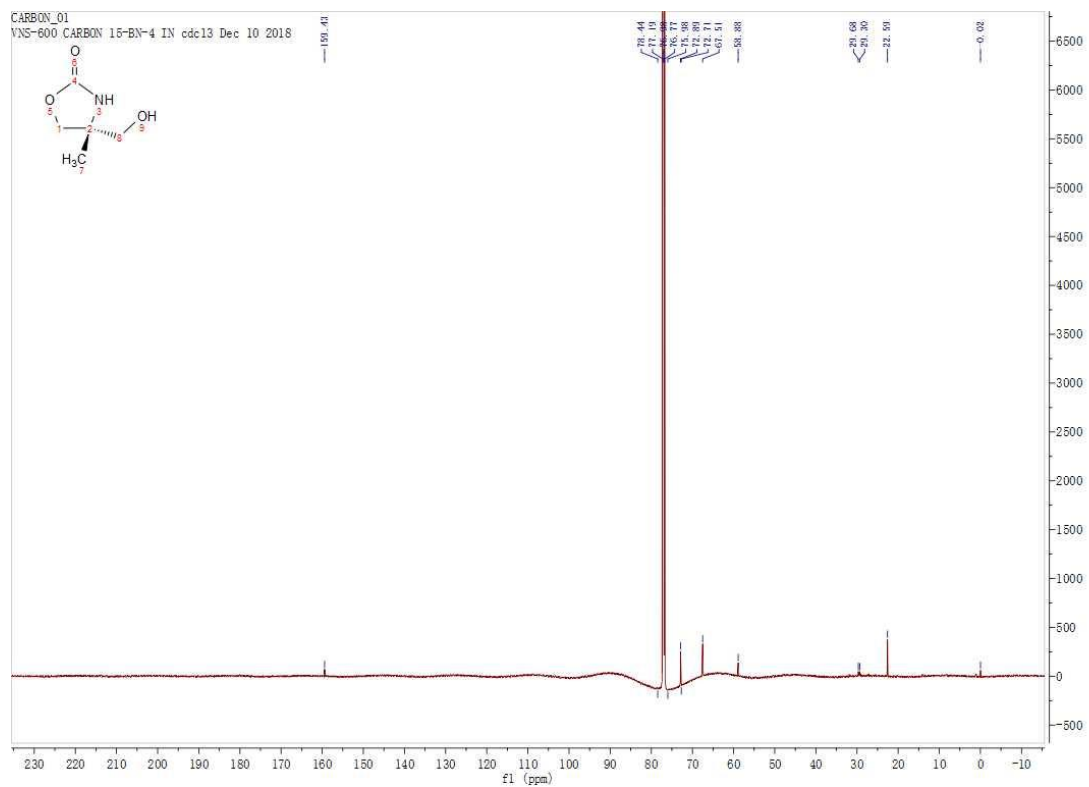

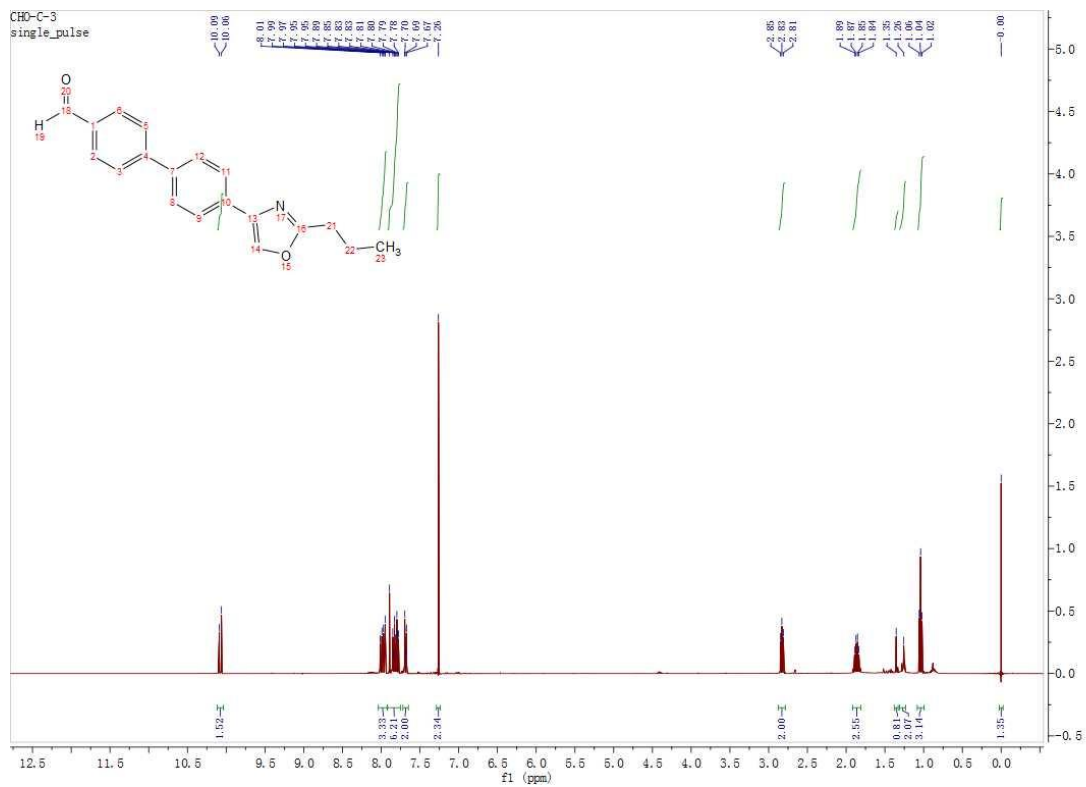

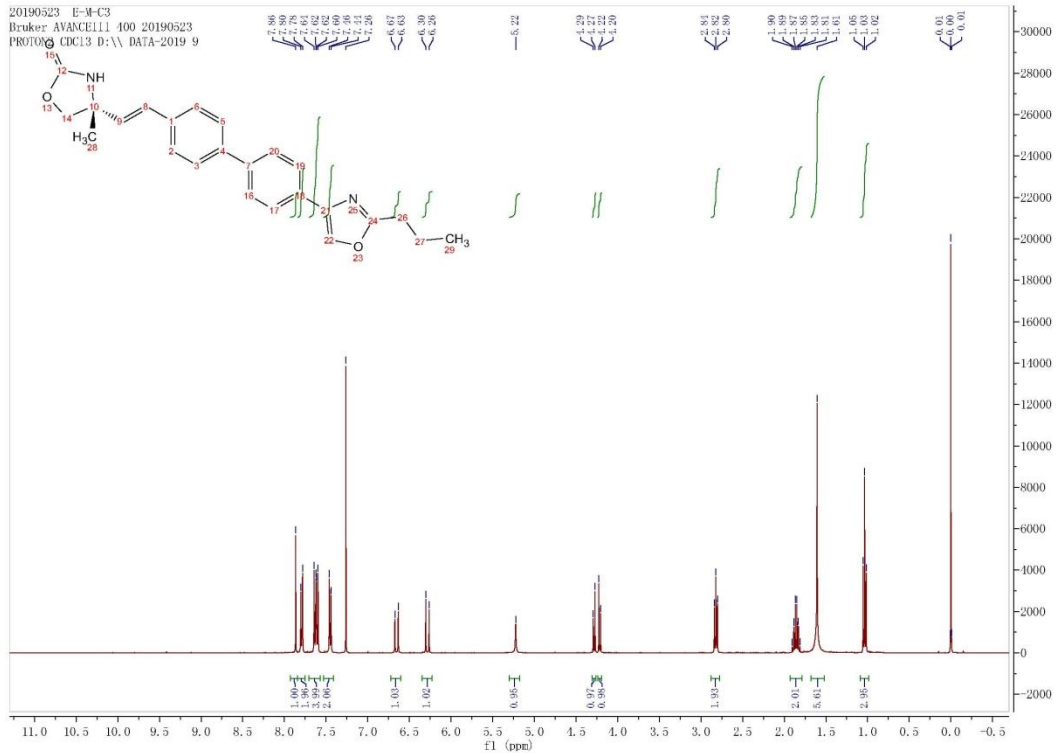

12

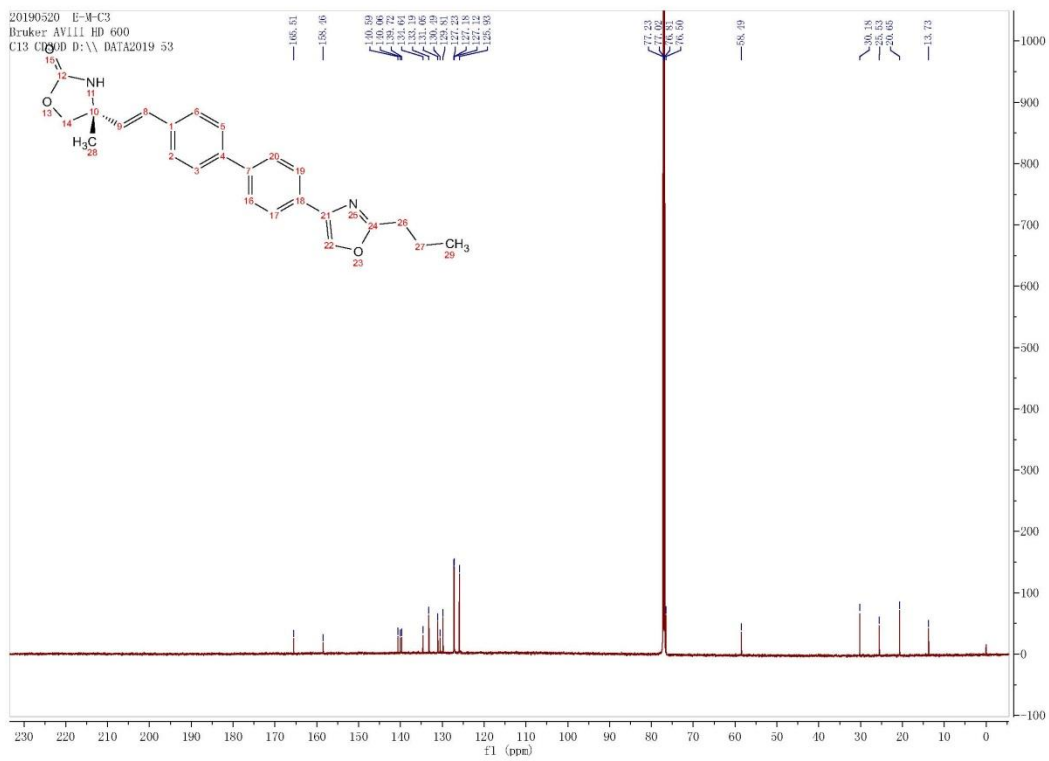

12



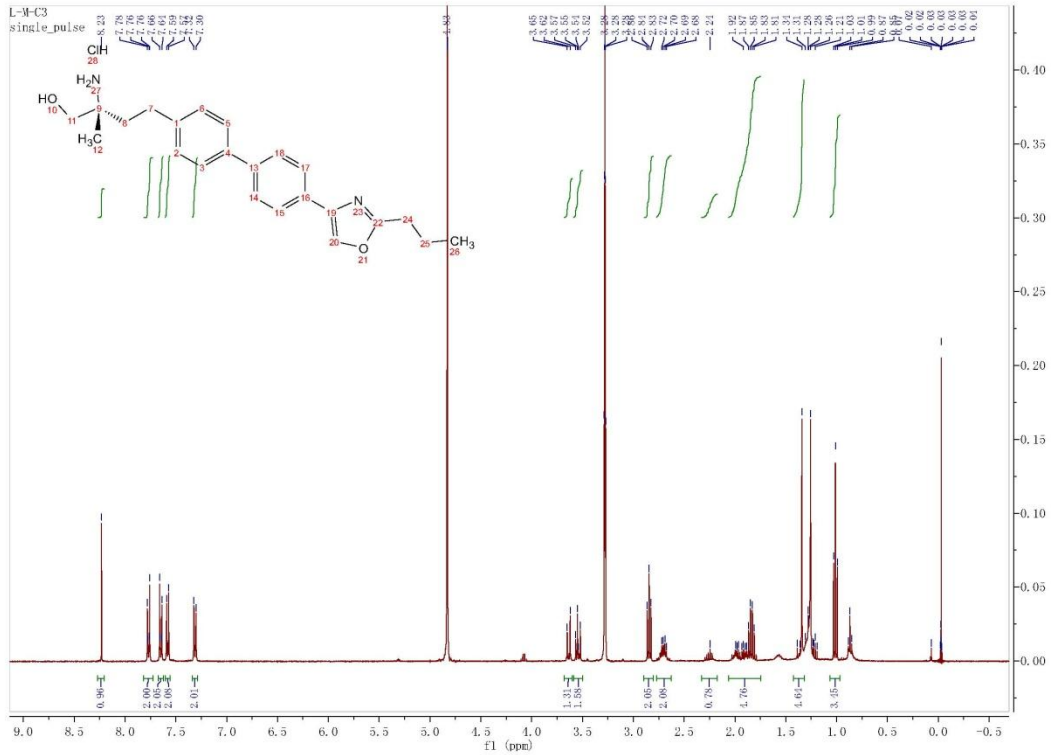

14

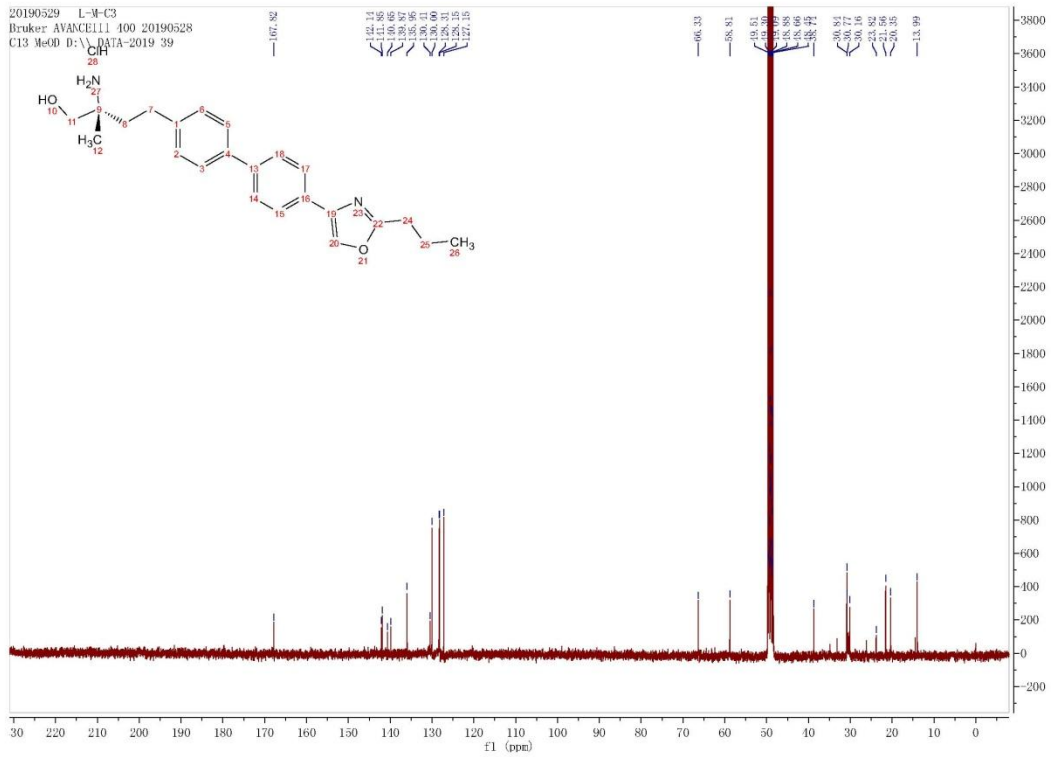

Compound 5a-Et dl

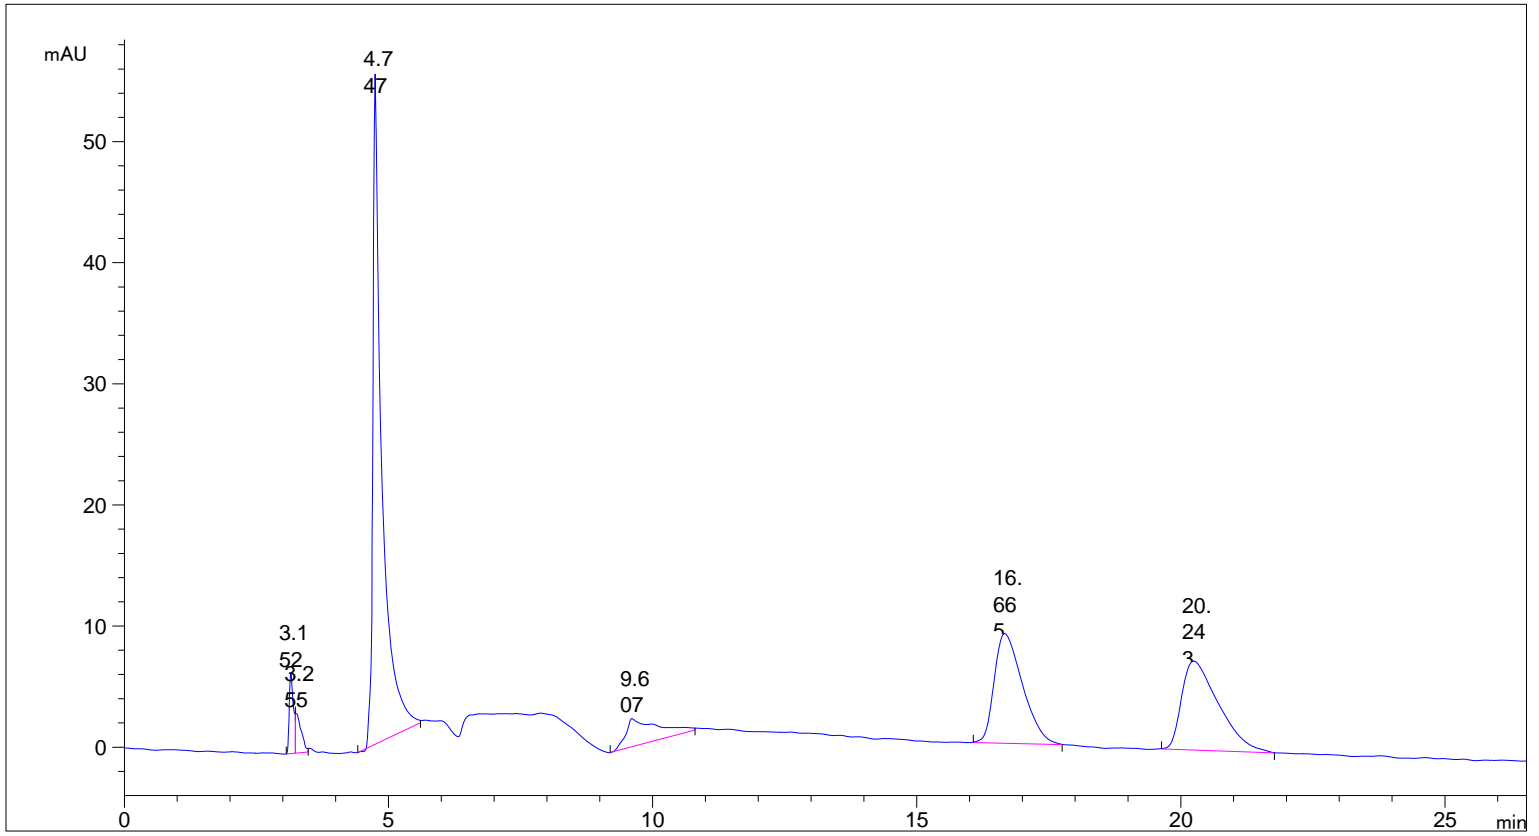

| Peak | Ret Time [min] | Height [mV*sec] | Area [mV] | Aear [%] |
|------|----------------|-----------------|-----------|----------|
| 1    | 16.665         | 9.05899         | 338.79767 | 22.4580  |
| 2    | 20.243         | 7.34823         | 356.26523 | 23.6159  |



# Compound 5a-Et

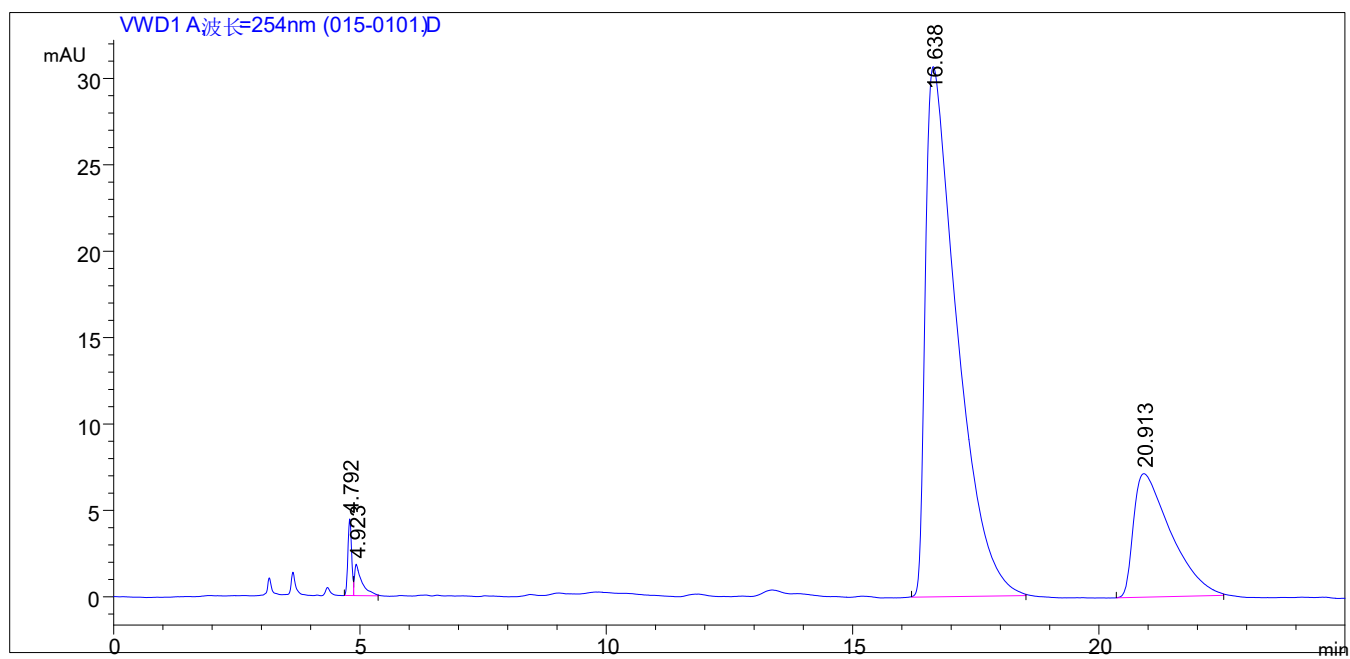

| Peak | Ret Time [min] | Height [mV*sec] | Area [mV]  | Aear [%] |
|------|----------------|-----------------|------------|----------|
| 1    | 16.638         | 30.68669        | 1372.30359 | 76.6872  |
| 2    | 20.913         | 7.14394         | 374.98001  | 20.9547  |

Compound **5a-Bn dl**

VWD1 A, 波长=254 nm (013-0101.D)

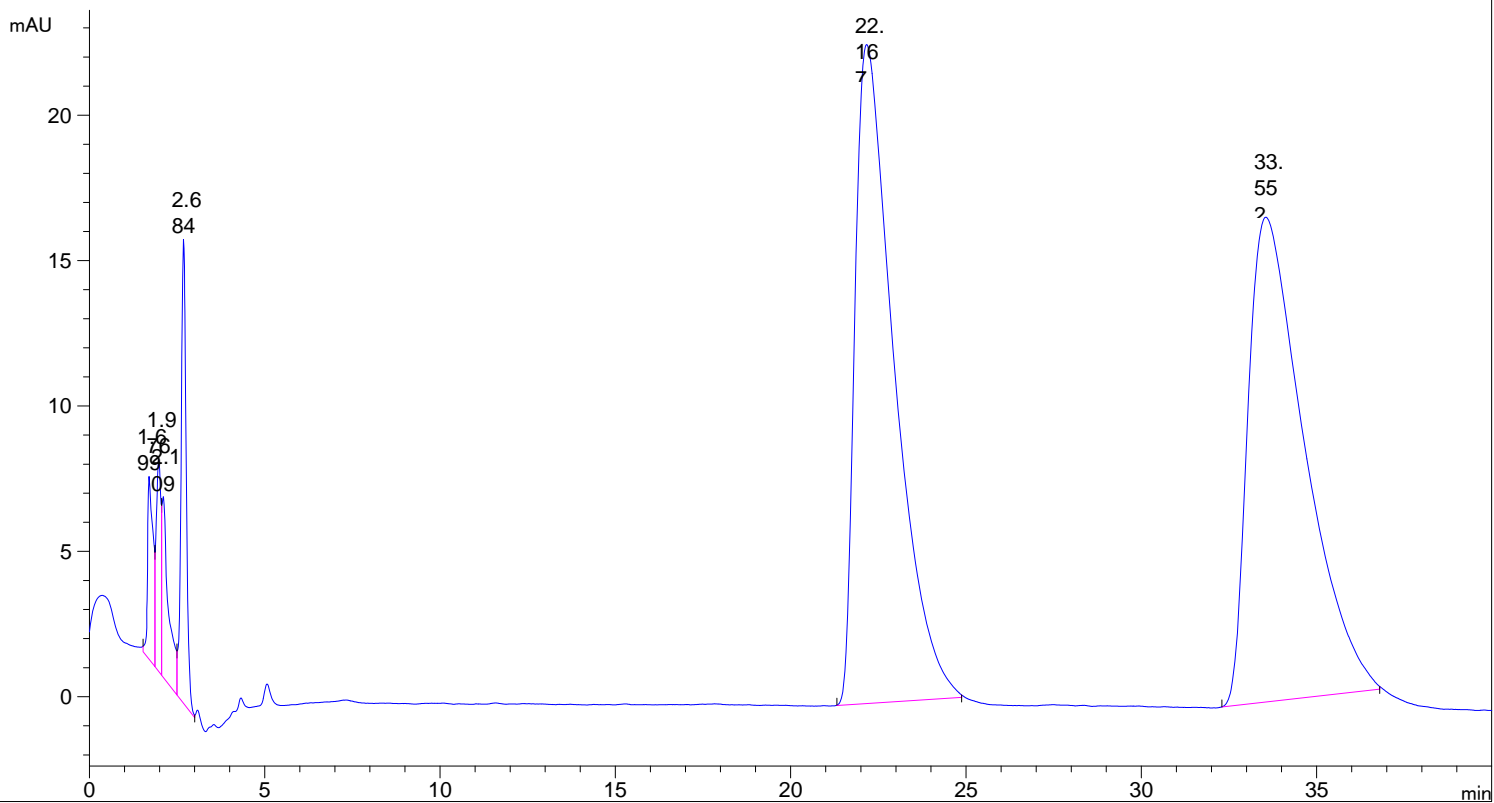

| Peak | Ret Time [min] | Height [mV*sec] | Area [mV]  | Aear [%] |
|------|----------------|-----------------|------------|----------|
| 1    | 22.167         | 22.66112        | 1768.23779 | 44.0888  |
| 2    | 33.552         | 16.67373        | 1859.02771 | 46.3526  |

Compound **5a-Bn**

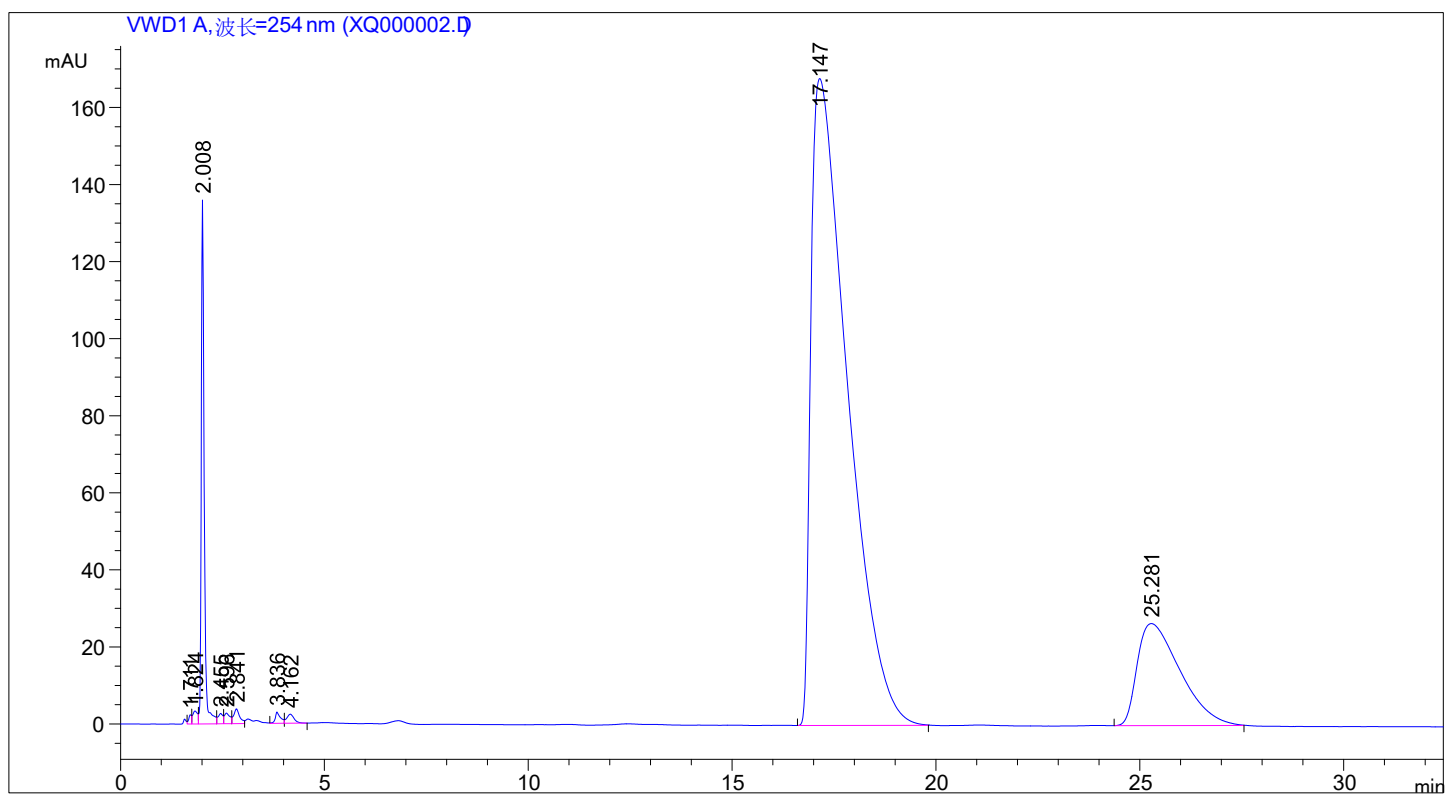

| Peak | Ret Time [min] | Height [mV*sec] | Area [mV]  | Aear [%] |
|------|----------------|-----------------|------------|----------|
| 1    | 17.147         | 167.86404       | 1.04715e4  | 78.9290  |
| 2    | 25.281         | 26.47453        | 1936.24060 | 14.5945  |

Compound **5a-p-CIBn**

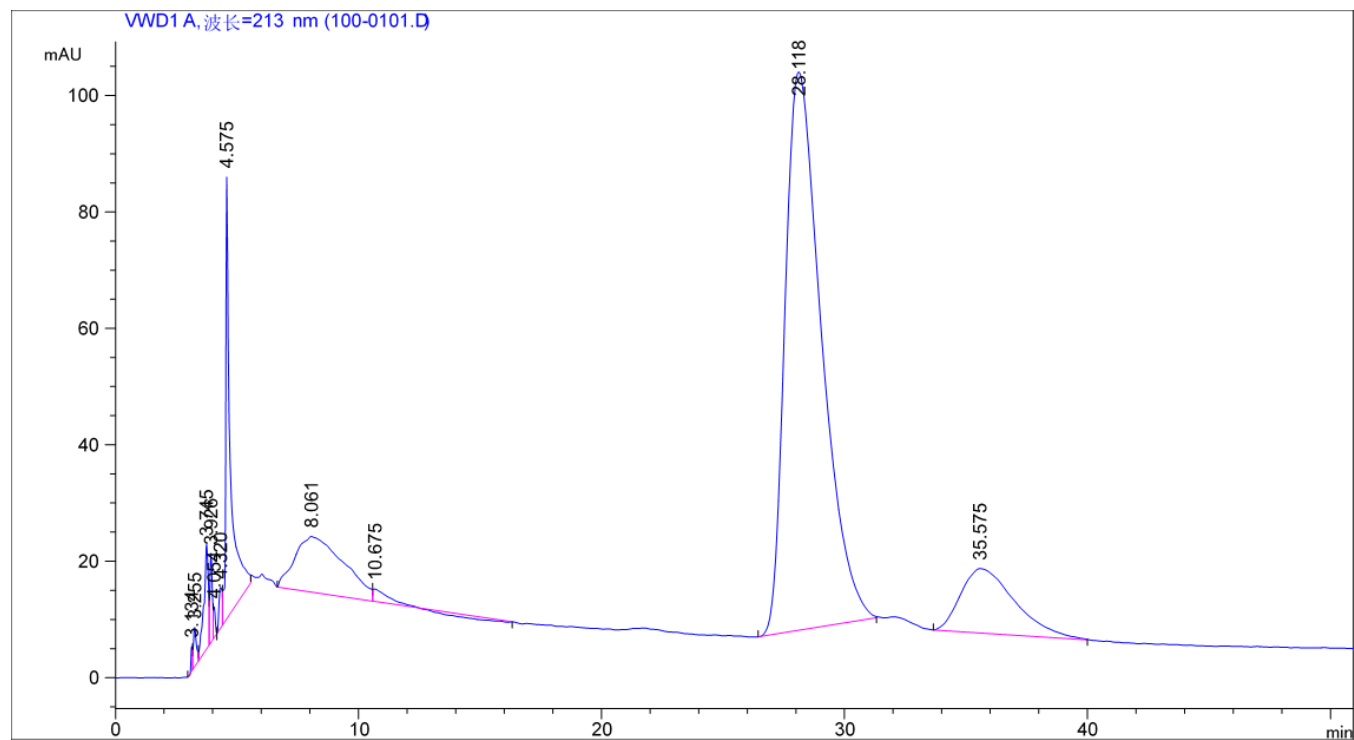

| Peak | Ret Time [min] | Height [mV*sec] | Area [mV]  | Aear [%] |
|------|----------------|-----------------|------------|----------|
| 1    | 28.118         | 95.91936        | 9999.09766 | 68.4824  |
| 2    | 35.575         | 11.02750        | 1705.92249 | 11.6836  |

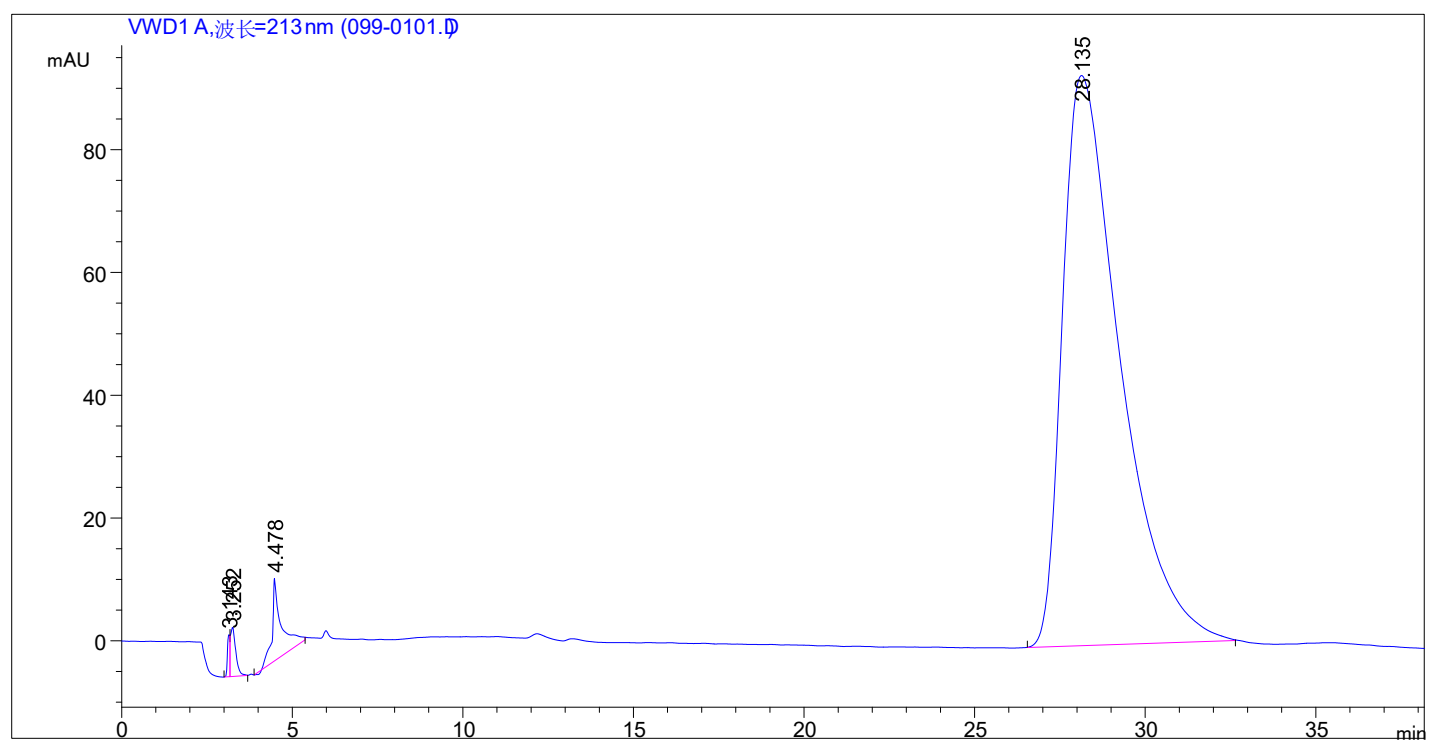

Compound **5b-Bn**

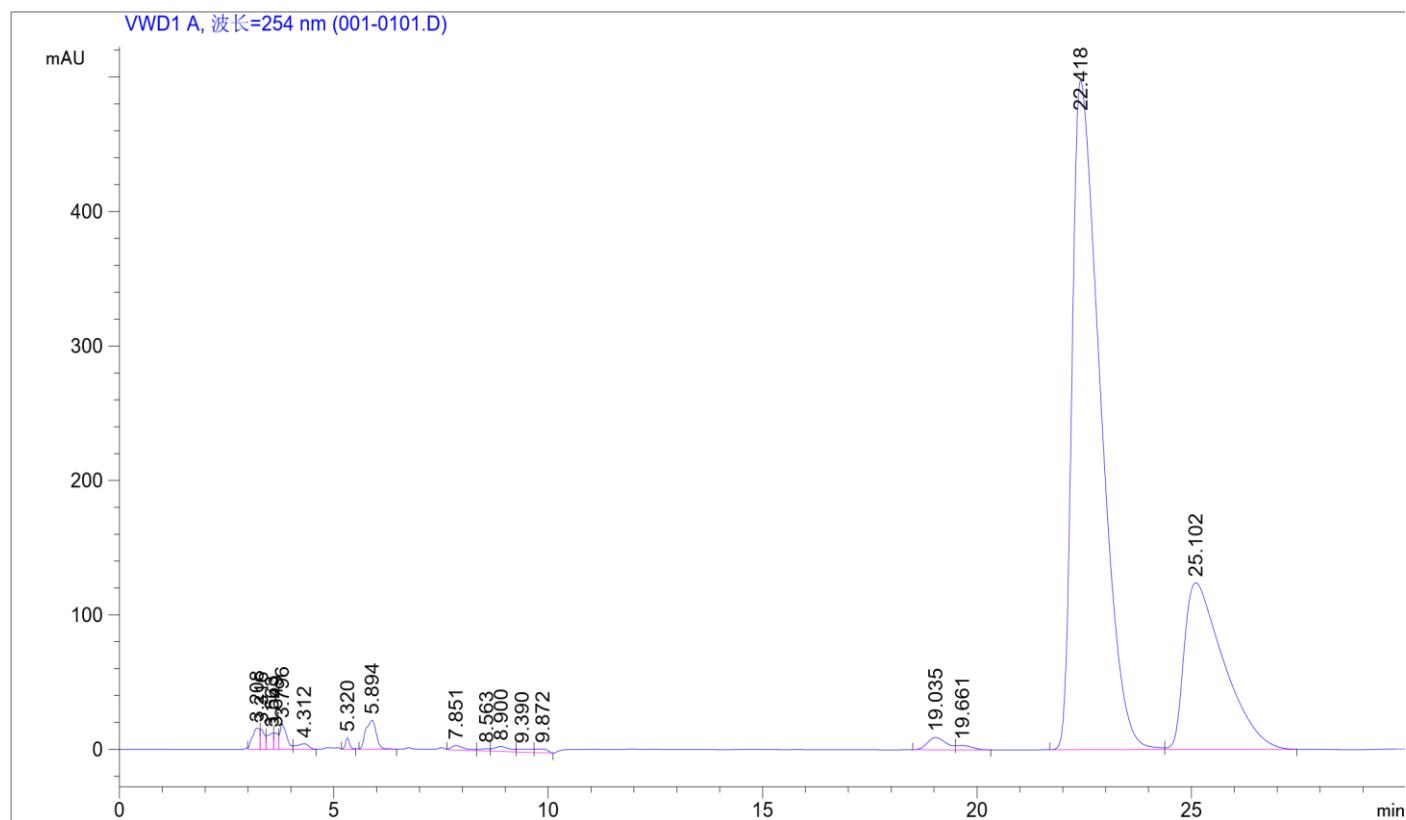

| Peak | Ret Time [min] | Height<br>[mV*sec] | Area<br>[mV] | Aear<br>[%] |
|------|----------------|--------------------|--------------|-------------|
| 1    | 22.418         | 497.77283          | 2.26849e4    | 69.6756     |
| 2    | 25.102         | 124.07160          | 7985.82617   | 24.5282     |

Compound **5b-p-CIBn**

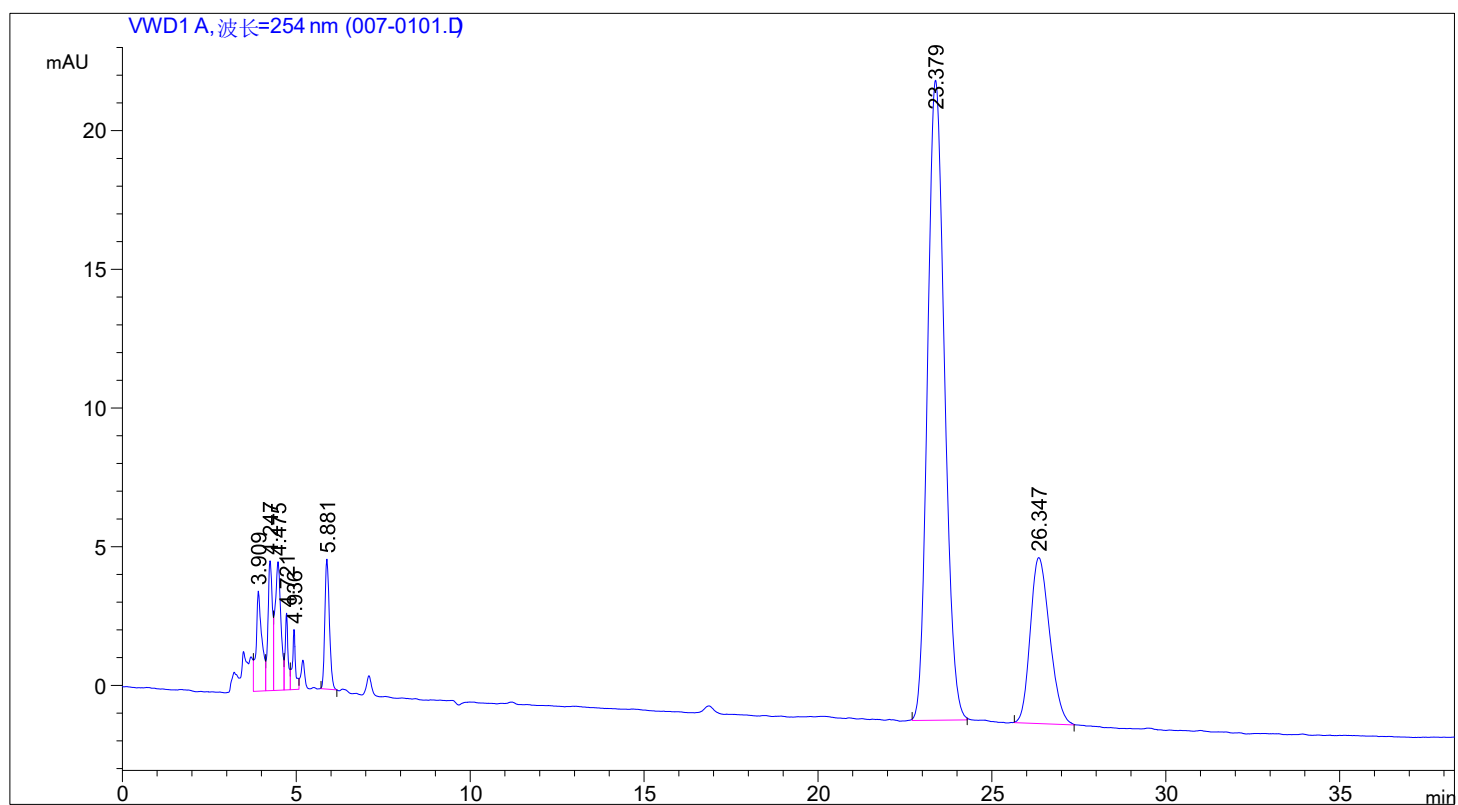

| Peak | Ret Time [min] | Height<br>[mV*sec] | Area<br>[mV] | Aear<br>[%] |
|------|----------------|--------------------|--------------|-------------|
| 1    | 23.379         | 23.07633           | 779.43982    | 63.7475     |
| 2    | 26.347         | 5.98660            | 232.08263    | 18.9812     |

Compound **5c-Bn**

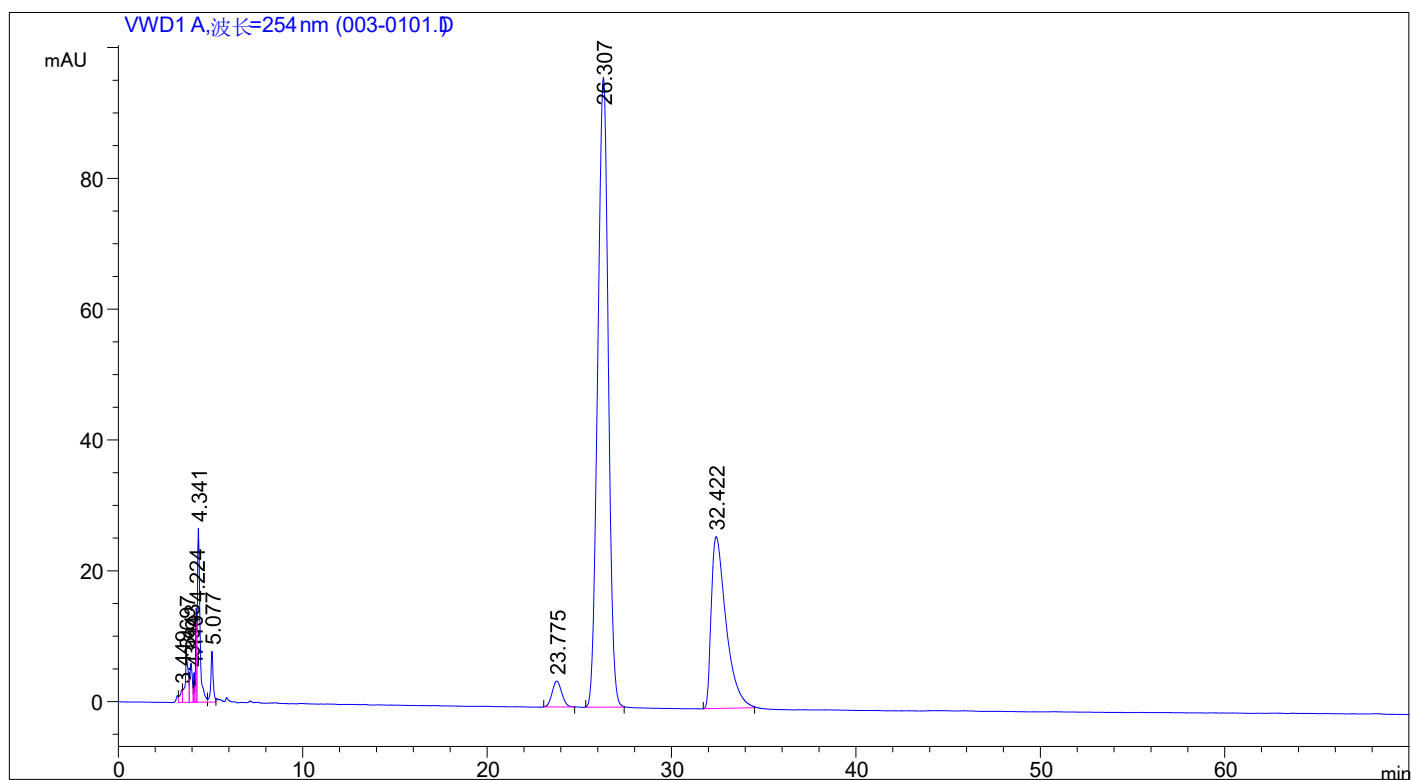

| Peak | Ret Time [min] | Height<br>[mV*sec] | Area<br>[mV] | Aear<br>[%] |
|------|----------------|--------------------|--------------|-------------|
| 1    | 26.307         | 96.30007           | 3828.54517   | 63.6508     |
| 2    | 32.422         | 26.26961           | 1466.70081   | 24.3844     |

Compound **5d-Et dl**

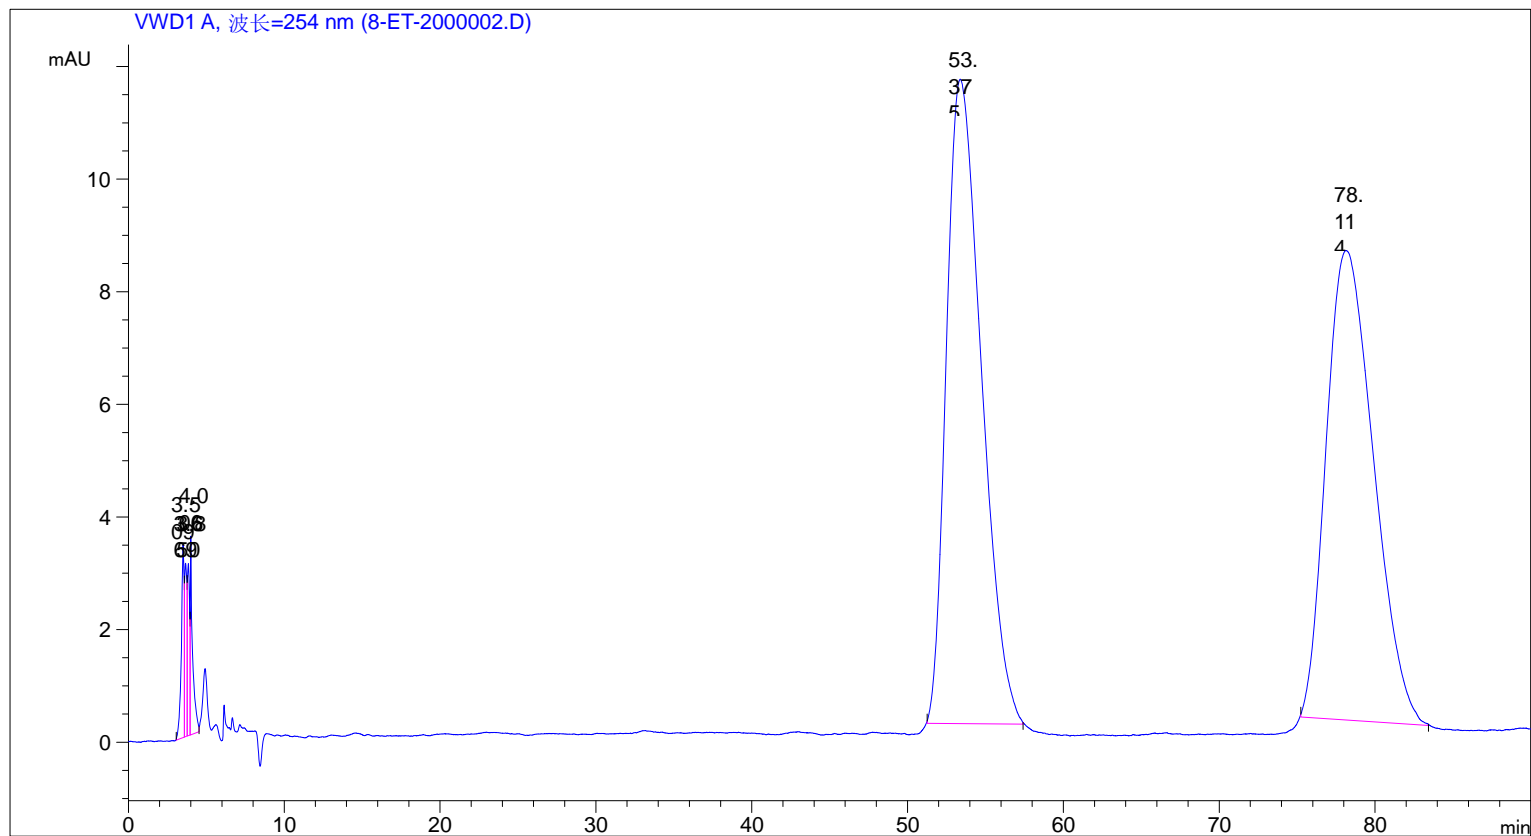

| Peak | Ret Time [min] | Height [mV*sec] | Area [mV]  | Aear [%] |
|------|----------------|-----------------|------------|----------|
| 1    | 53.375         | 11.44293        | 1787.11304 | 48.4324  |
| 2    | 78.114         | 8.33517         | 1763.58191 | 47.7947  |



Compound 5d-Et

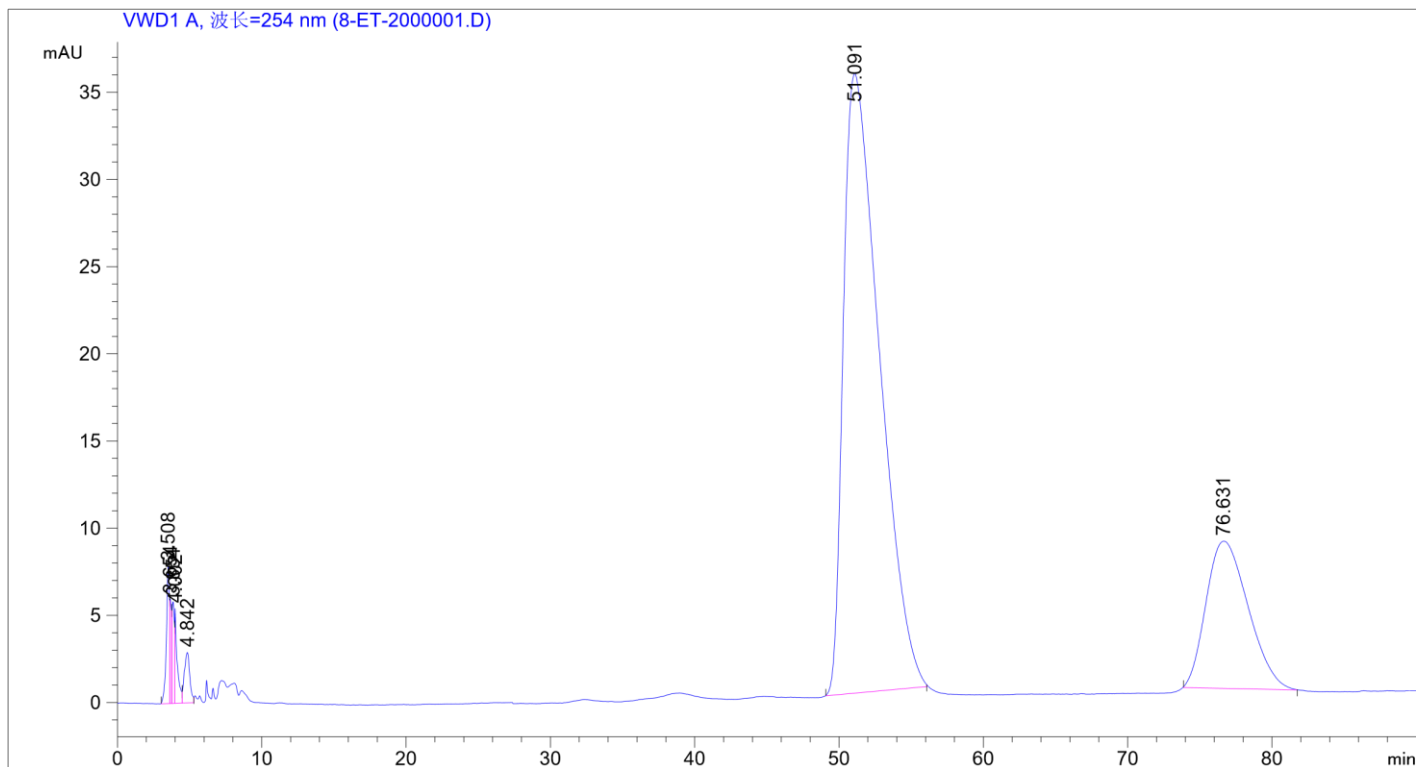

| Peak | Ret Time [min] | Height [mV*sec] | Area [mV]  | Acar [%] |
|------|----------------|-----------------|------------|----------|
| 1    | 51.091         | 35.53398        | 6166.01953 | 74.7797  |
| 2    | 76.631         | 8.44297         | 1714.03906 | 20.7874  |

Compound **5d-Bn dl**

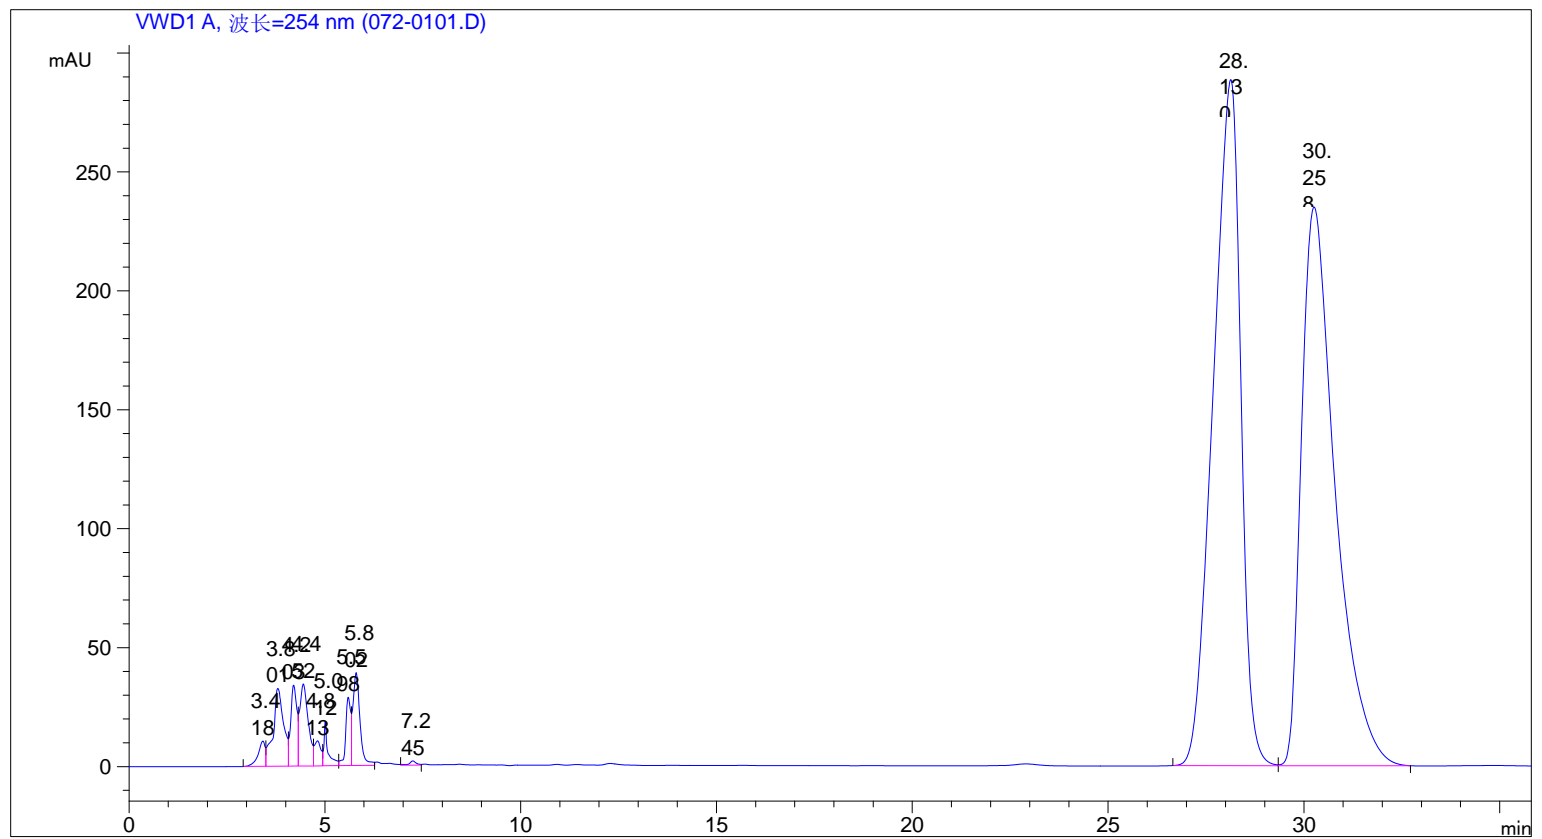

| Peak | Ret Time [min] | Height [mV*sec] | Area [mV] | Aear [%] |
|------|----------------|-----------------|-----------|----------|
| 1    | 28.130         | 288.49295       | 1.40625e4 | 45.6043  |
| 2    | 30.258         | 234.95171       | 1.41093e4 | 45.7559  |

Compound **5d-Bn**

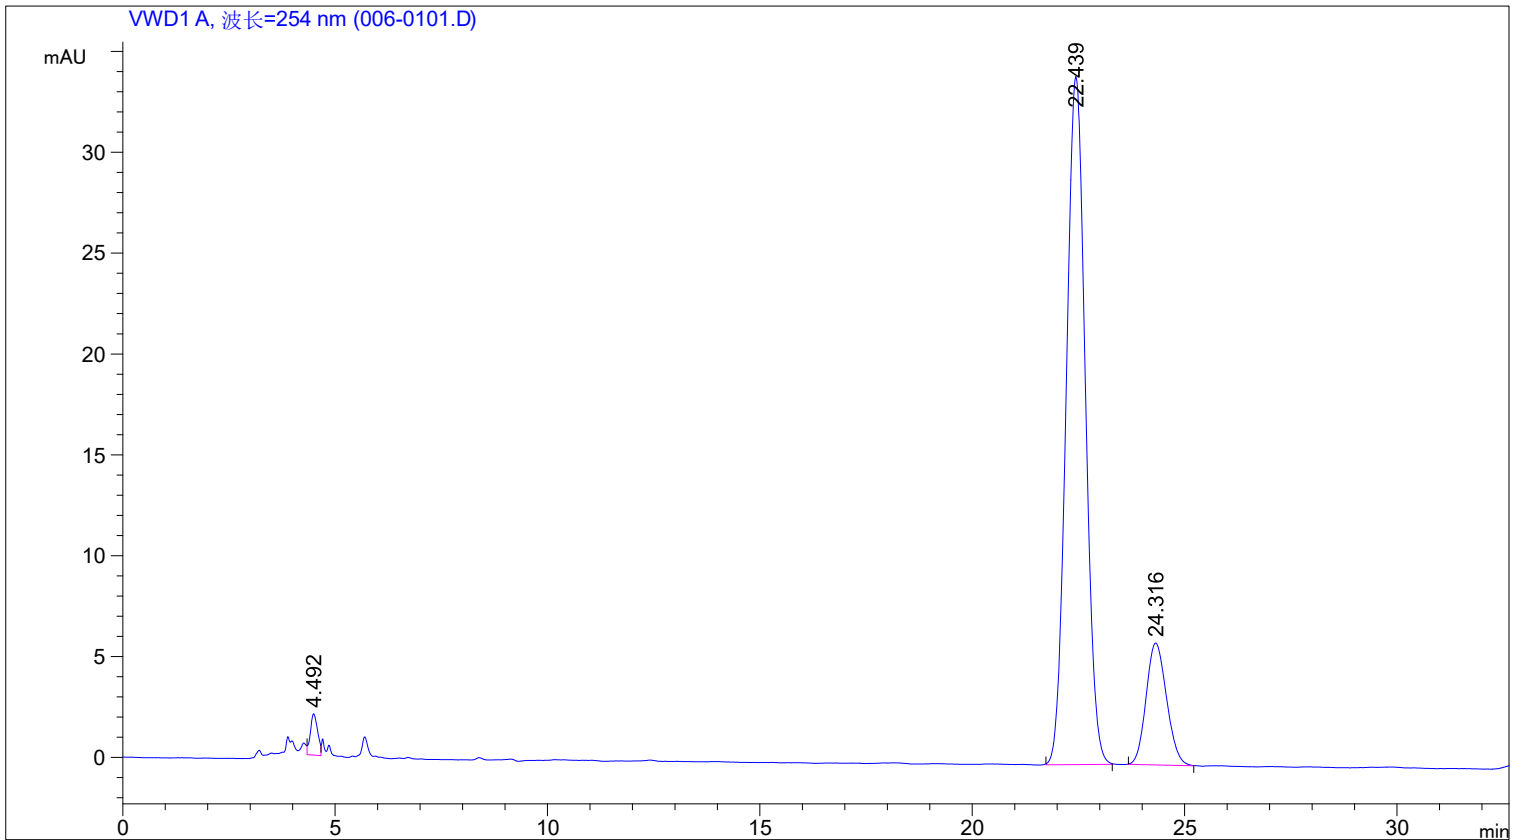

| Peak | Ret Time [min] | Height [mV*sec] | Area [mV]  | Aear [%] |
|------|----------------|-----------------|------------|----------|
| 1    | 22.439         | 34.10795        | 1060.89453 | 82.4073  |
| 2    | 24.316         | 6.04603         | 201.99294  | 15.6902  |

Compound **5d-p-CIBn**

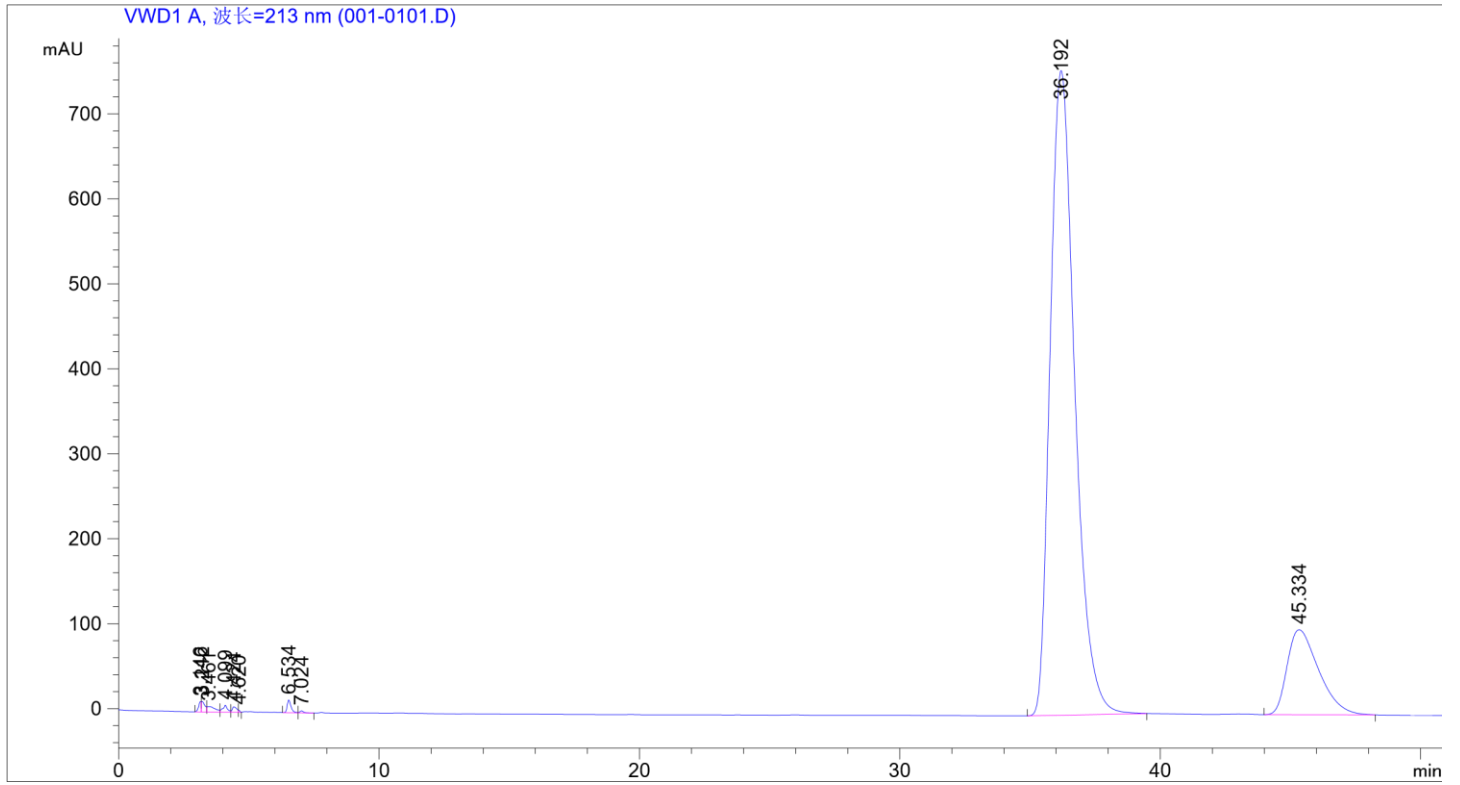

| Peak | Ret Time [min] | Height [mV*sec] | Area [mV]  | Aear [%] |
|------|----------------|-----------------|------------|----------|
| 1    | 36.192         | 758.66632       | 4.96948e4  | 84.4757  |
| 2    | 45.334         | 100.00033       | 8434.26563 | 14.3373  |

Compound 5e-Et

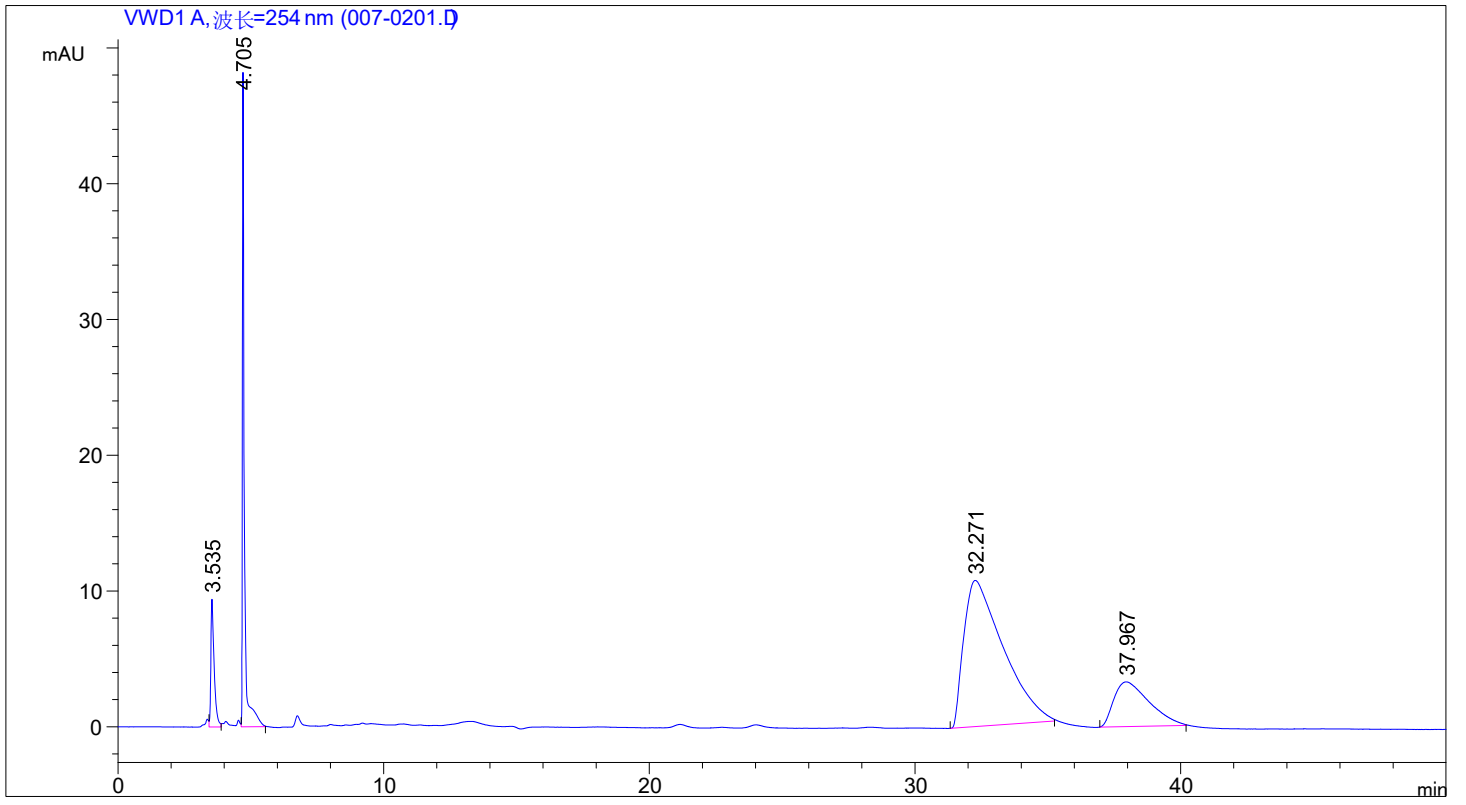

| Peak | Ret Time [min] | Height [mV*sec] | Area [mV]  | Aear [%] |
|------|----------------|-----------------|------------|----------|
| 1    | 32.271         | 10.76539        | 1109.67090 | 63.9755  |
| 2    | 37.967         | 3.29769         | 305.14505  | 17.5924  |

Compound **5e-Bn dl**

VWD1 A, 波长=254 nm (001-0101.D)

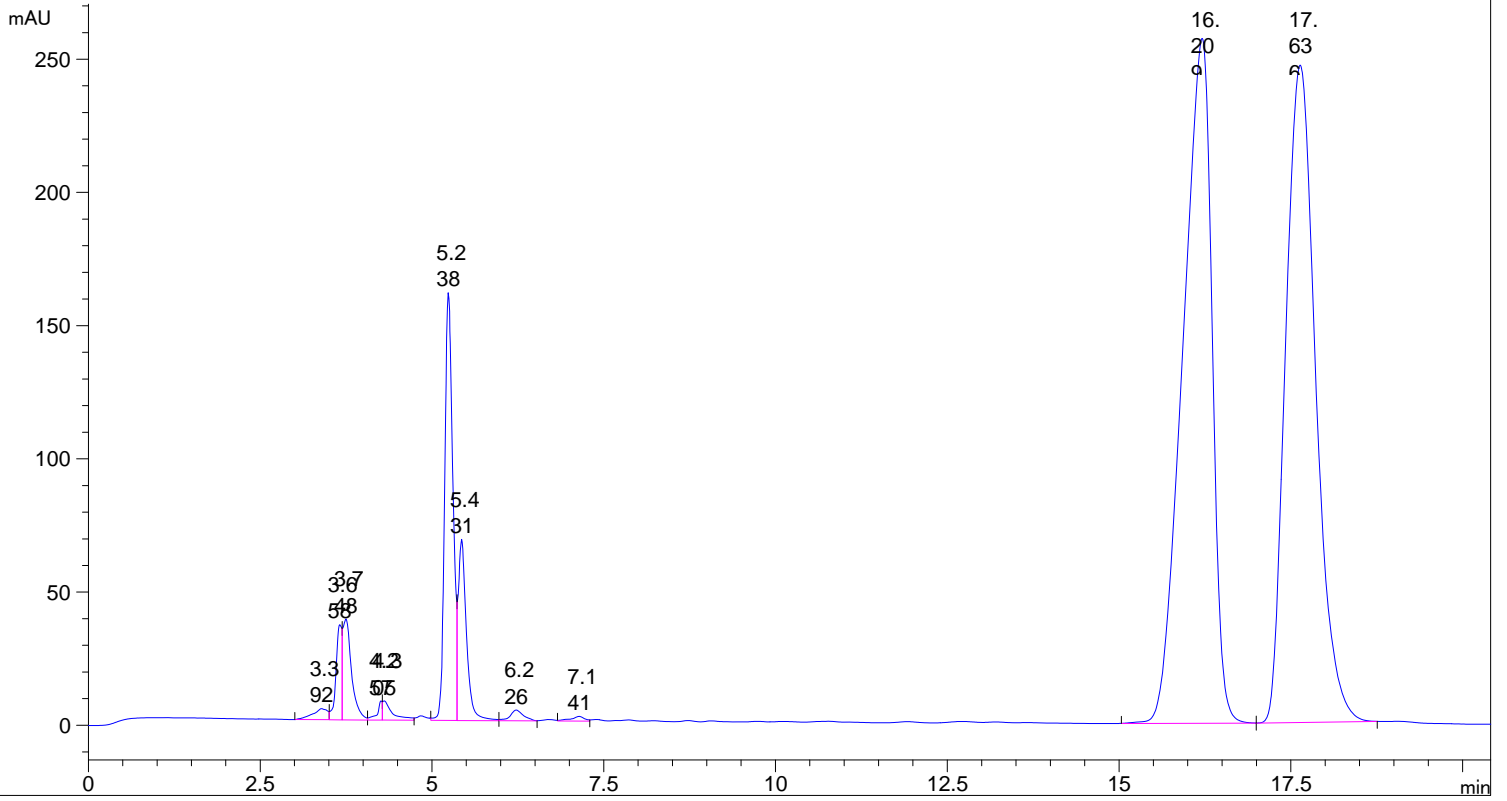

| Peak | Ret Time [min] | Height [mV*sec] | Area [mV]  | Aear [%] |
|------|----------------|-----------------|------------|----------|
| 1    | 16.209         | 257.02286       | 7578.80127 | 42.6564  |
| 2    | 17.636         | 246.73605       | 7490.40723 | 42.1588  |

Compound **5e-Bn**

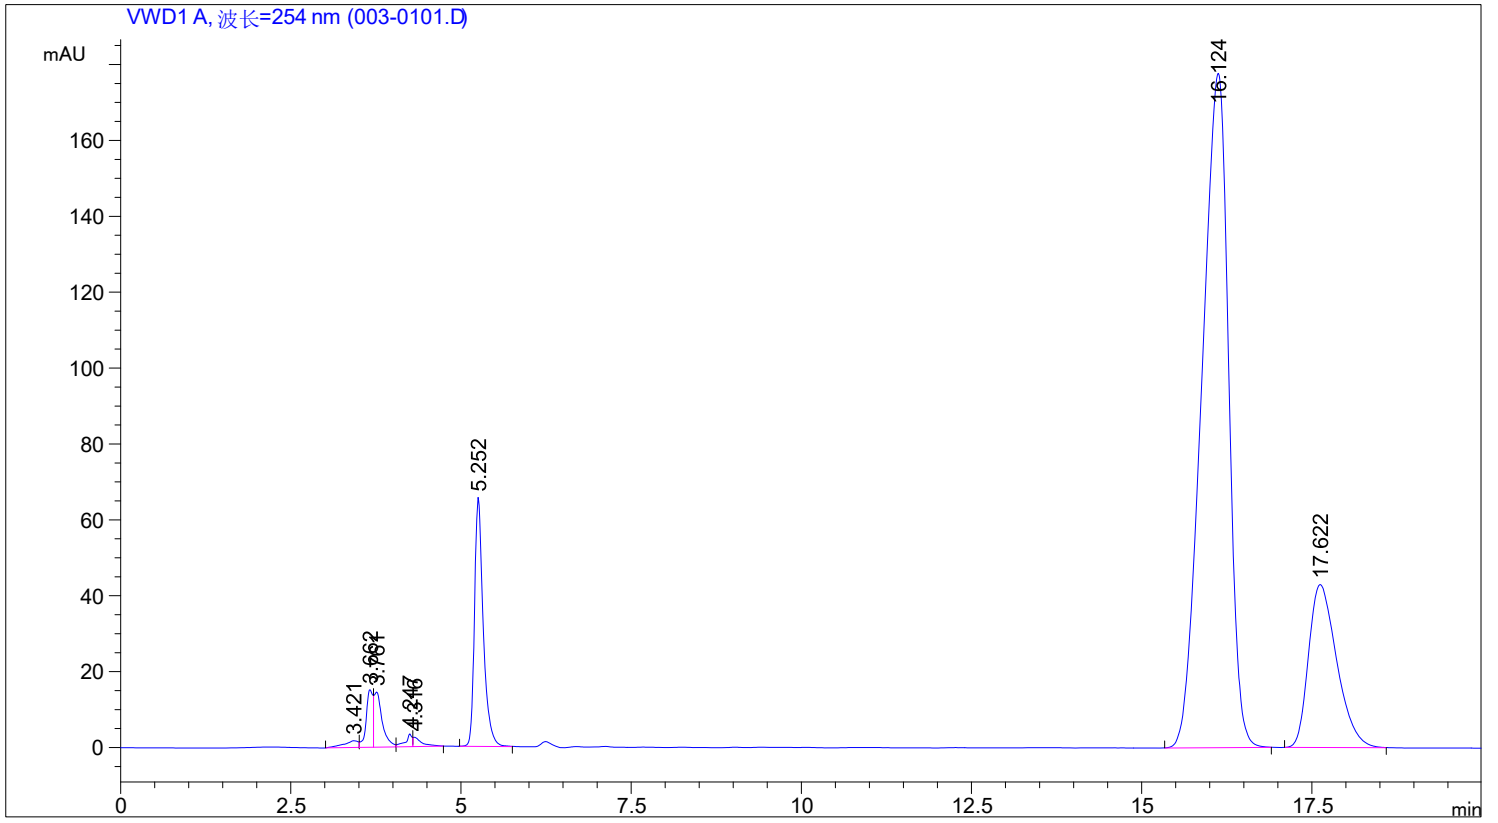

| Peak | Ret Time [min] | Height [mV*sec] | Area [mV]  | Aear [%] |
|------|----------------|-----------------|------------|----------|
| 1    | 16.124         | 177.72337       | 4824.42041 | 69.4815  |
| 2    | 17.622         | 42.93740        | 1236.37244 | 17.8063  |

Compound **5f-Bn dl**

VWD1 A, 波长=254 nm (DEF\_LC 2006-01-27 04-37-11\041-0101.D)

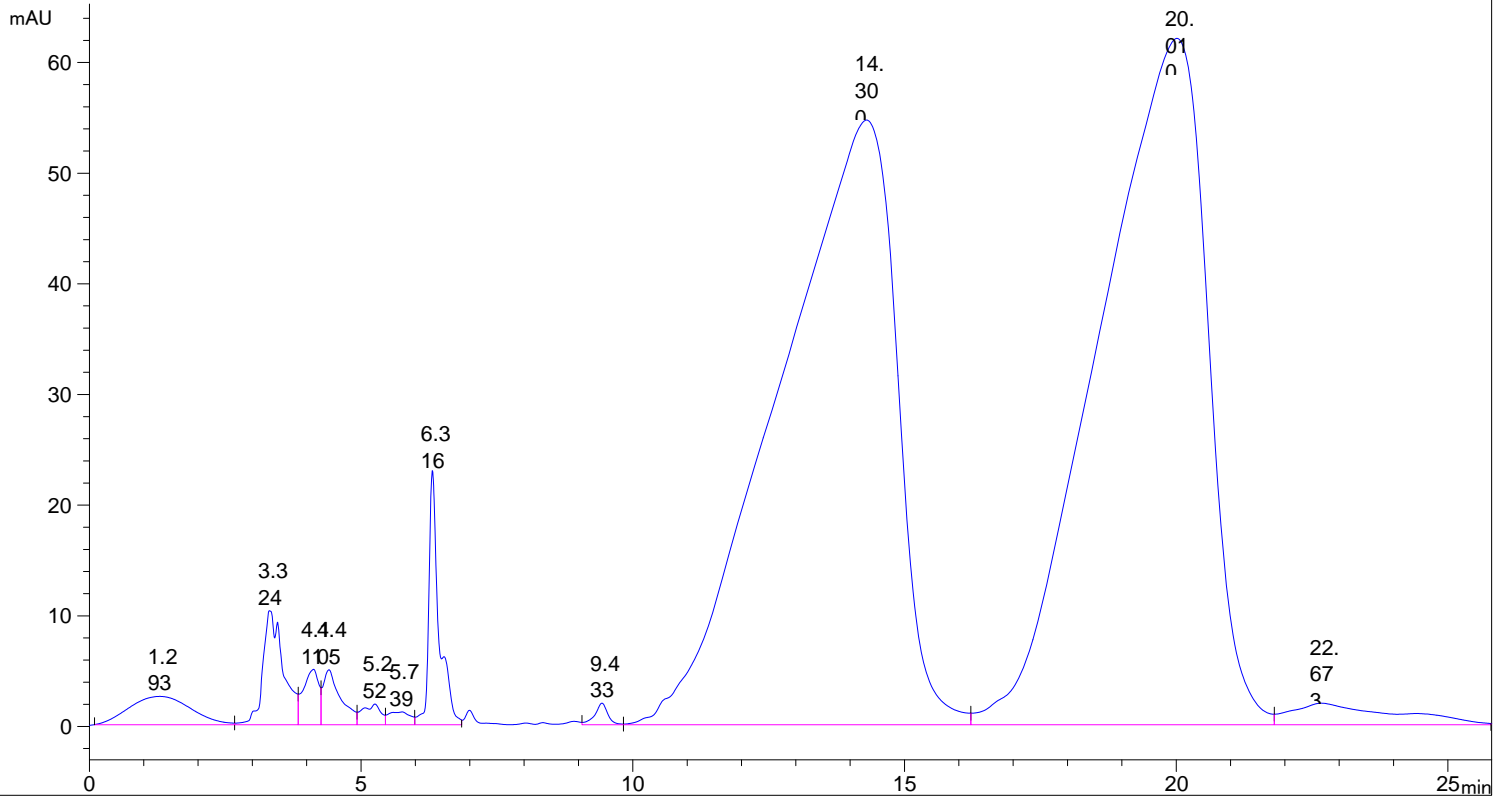

| Peak | Ret Time [min] | Height [mV*sec] | Area [mV]  | Aear [%] |
|------|----------------|-----------------|------------|----------|
| 1    | 14.300         | 54.62917        | 8240.16113 | 45.2494  |
| 2    | 20.010         | 62.01163        | 8626.79785 | 47.3726  |



Compound **5f-Bn**

VWD1 A, 波长=213 nm (001-0101.D)

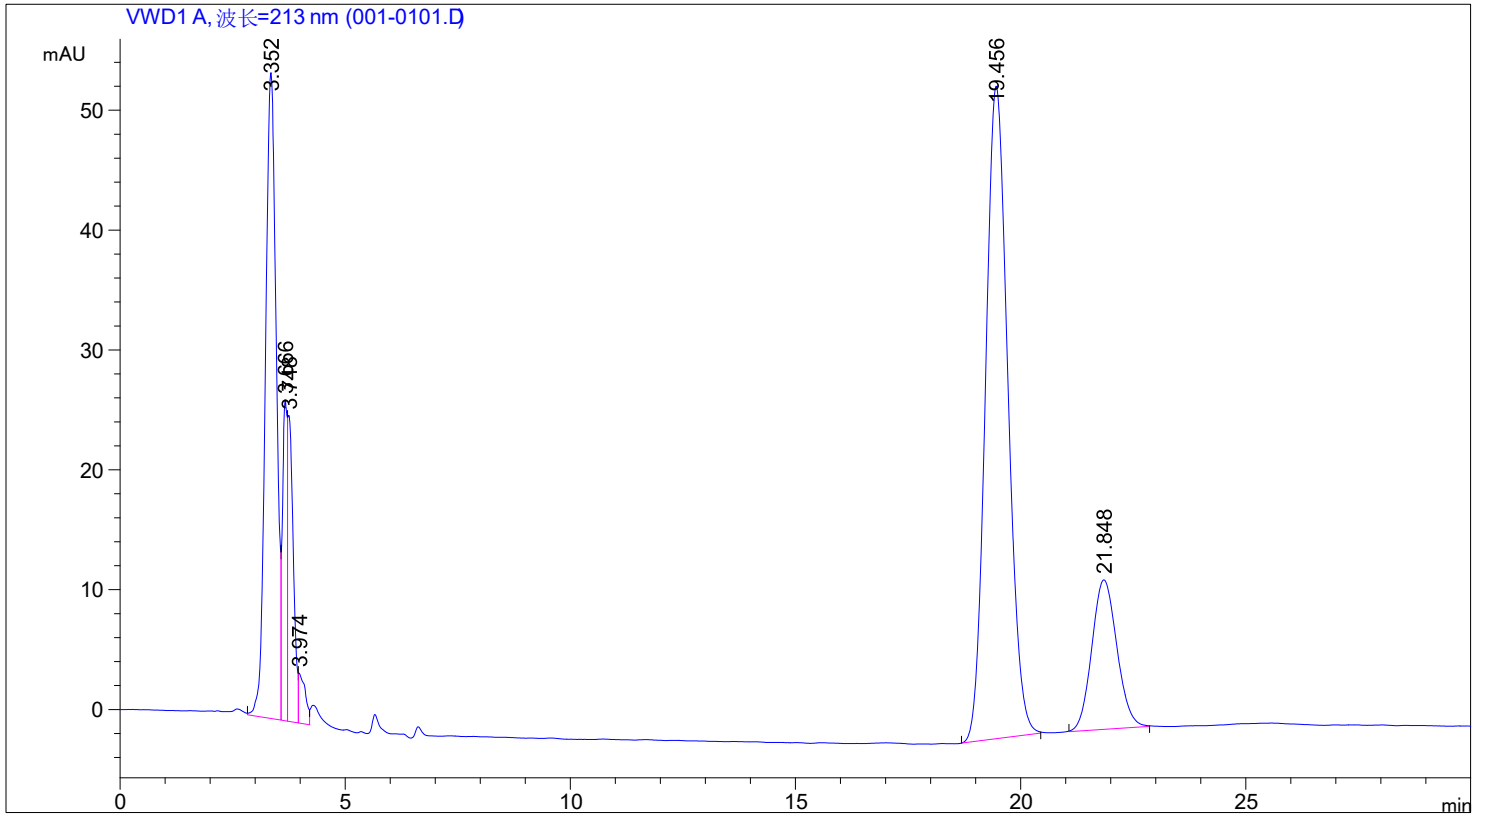

| Peak | Ret Time [min] | Height [mV*sec] | Area [mV]  | Aear [%] |
|------|----------------|-----------------|------------|----------|
| 1    | 19.456         | 54.43020        | 1869.71924 | 50.3427  |
| 2    | 21.848         | 12.47171        | 481.57748  | 12.9666  |

Compound **5f-p-CIBn**

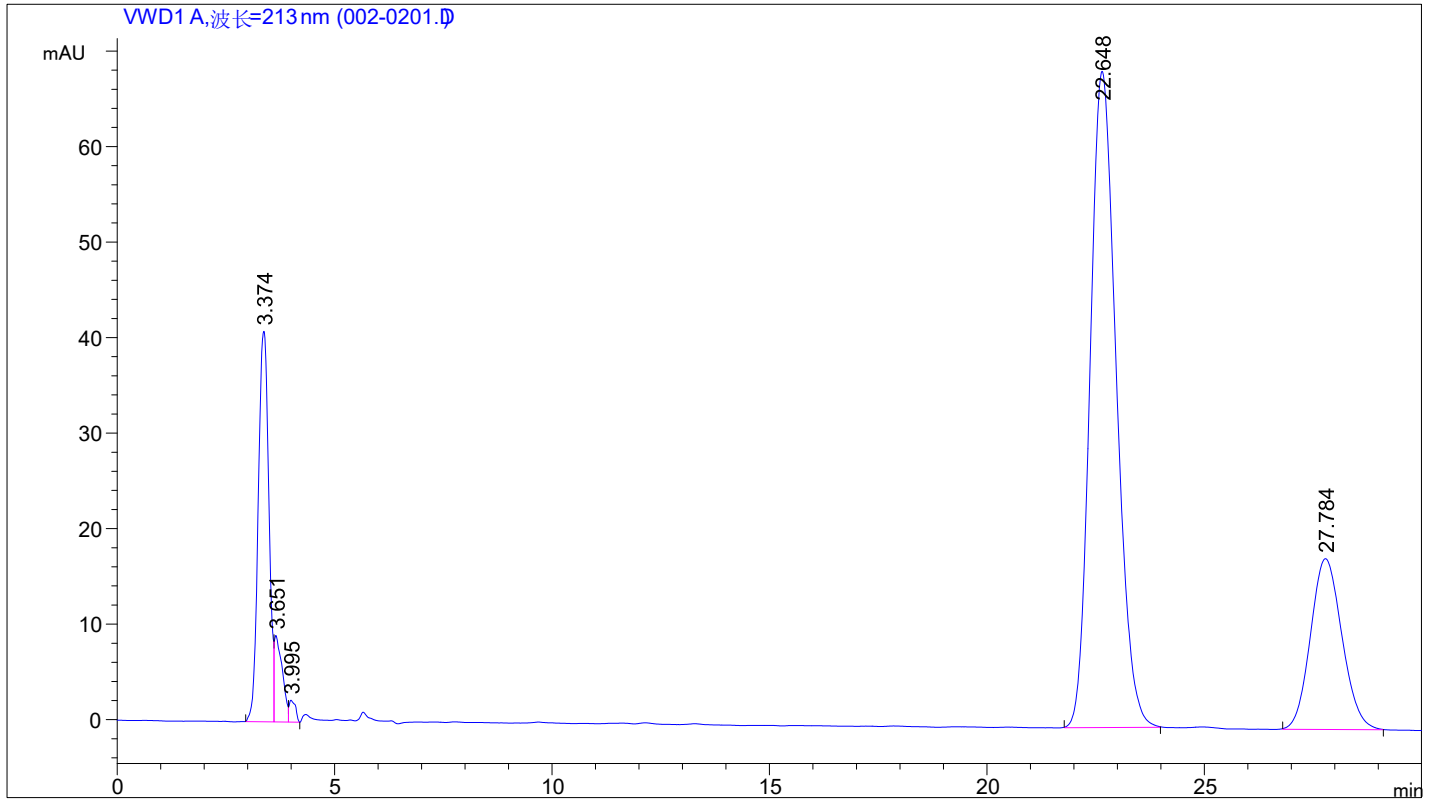

| Peak | Ret Time [min] | Height [mV*sec] | Area [mV]  | Aear [%] |
|------|----------------|-----------------|------------|----------|
| 1    | 22.648         | 68.70069        | 2864.91846 | 62.3241  |
| 2    | 27.784         | 17.8804         | 899.32349  | 19.5641  |

Compound **5g-p-CIBn**

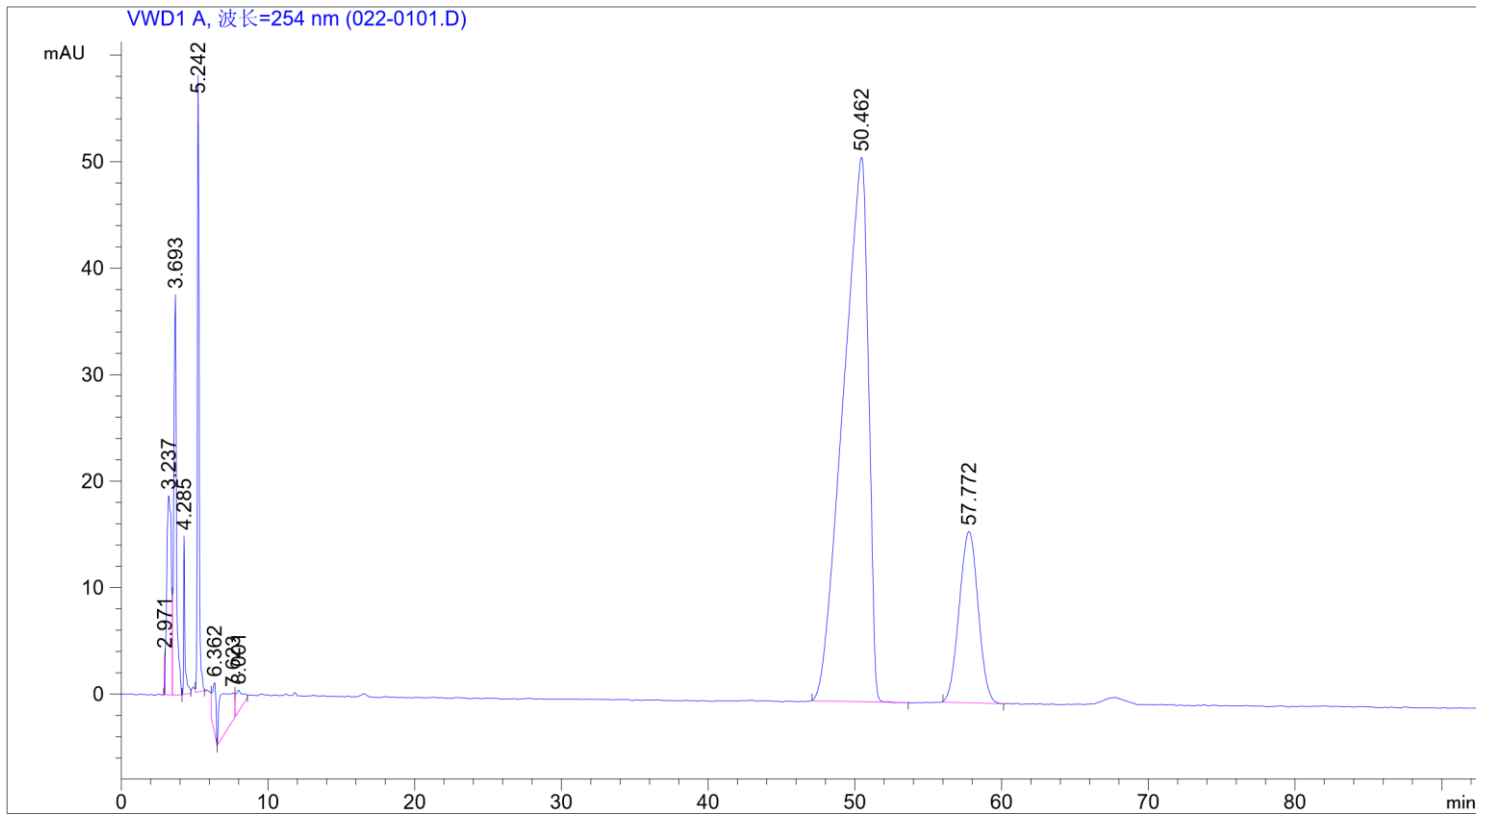

| Peak | Ret Time [min] | Height<br>[mV*sec] | Area<br>[mV] | Aear<br>[%] |
|------|----------------|--------------------|--------------|-------------|
| 1    | 50.462         | 51.12057           | 6106.41260   | 64.8842     |
| 2    | 57.772         | 16.08788           | 1445.99084   | 15.3645     |

Compound **5h-Bn dl**

VWD1 A, 波长=254 nm (C:\CHEM32\1\DATA\XQ\DEF\_LC 2018-07-11 17-39-26\8-ET-2000001.D)

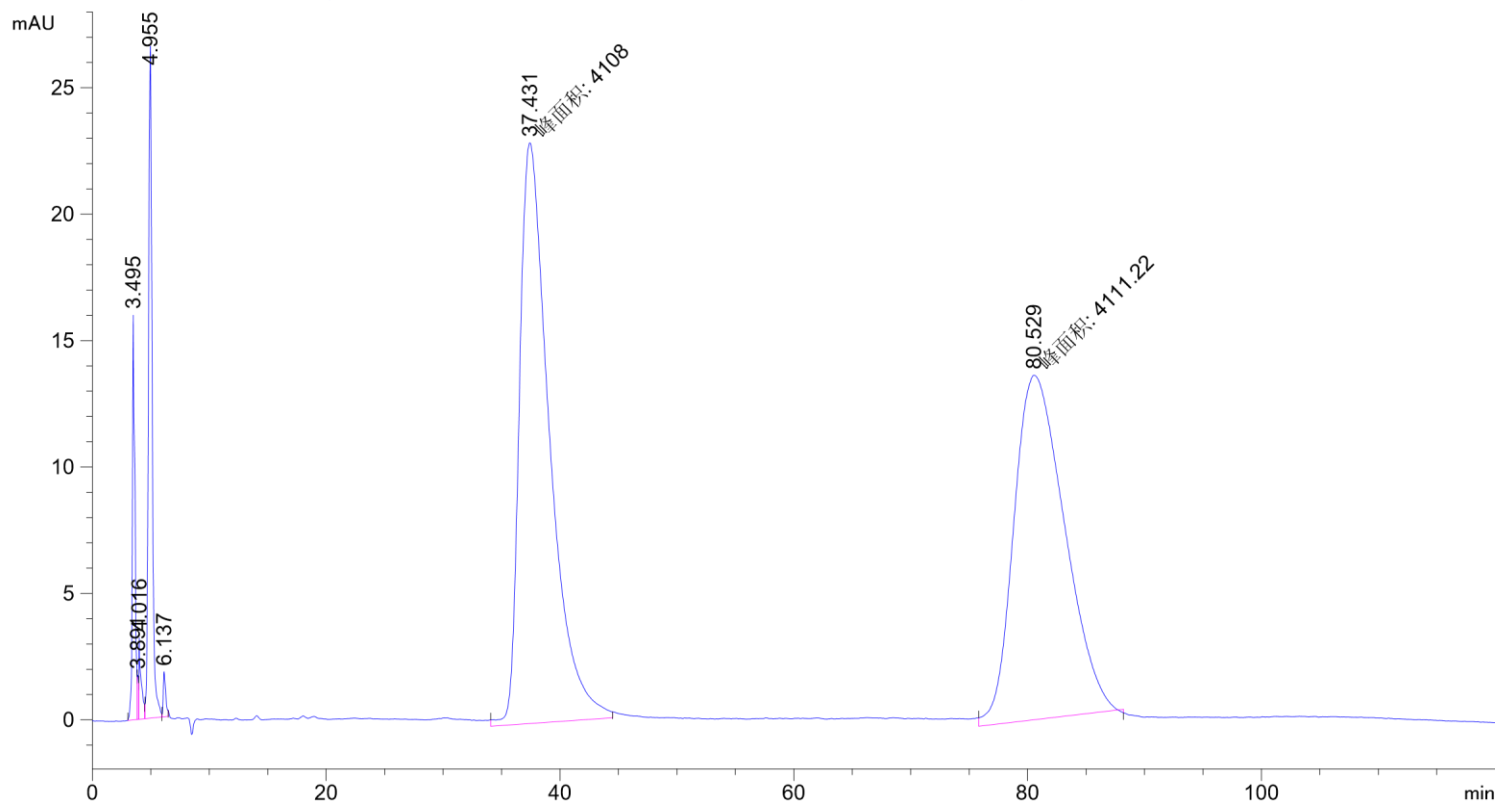

| Peak | Ret Time [min] | Height [mV*sec] | Area [mV]  | Aear [%] |
|------|----------------|-----------------|------------|----------|
| 1    | 37.431         | 22.96922        | 4107.99951 | 44.9871  |
| 2    | 80.529         | 13.63098        | 4111.21924 | 45.0223  |

Compound **5h-Bn**

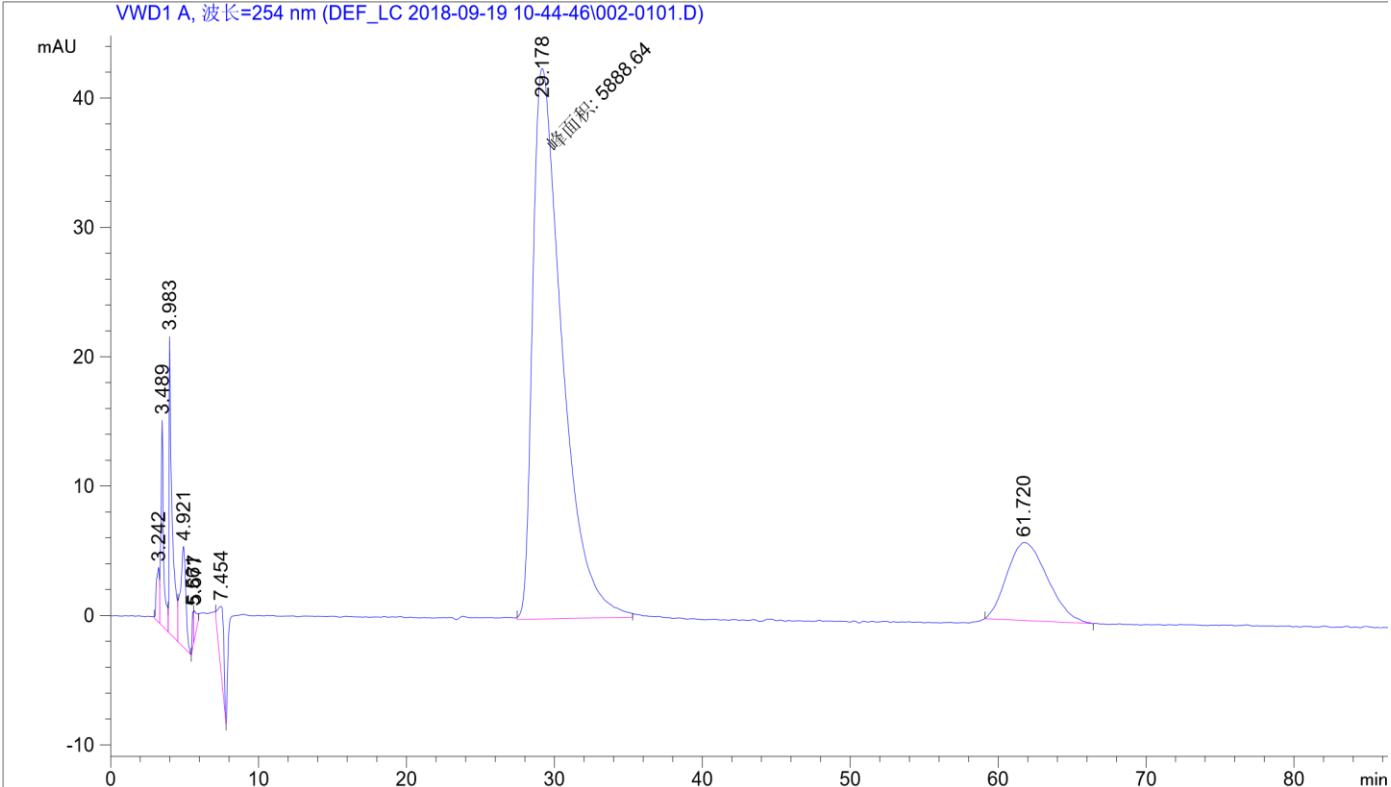

| Peak | Ret Time [min] | Height [mV*sec] | Area [mV]  | Aear [%] |
|------|----------------|-----------------|------------|----------|
| 1    | 29.178         | 42.57212        | 5888.64355 | 73.7024  |
| 2    | 61.720         | 6.01482         | 1146.58789 | 14.3507  |

Compound **5h-p-CIBn dl**

VWD1 A, 波长=254 nm (001-0201.D)

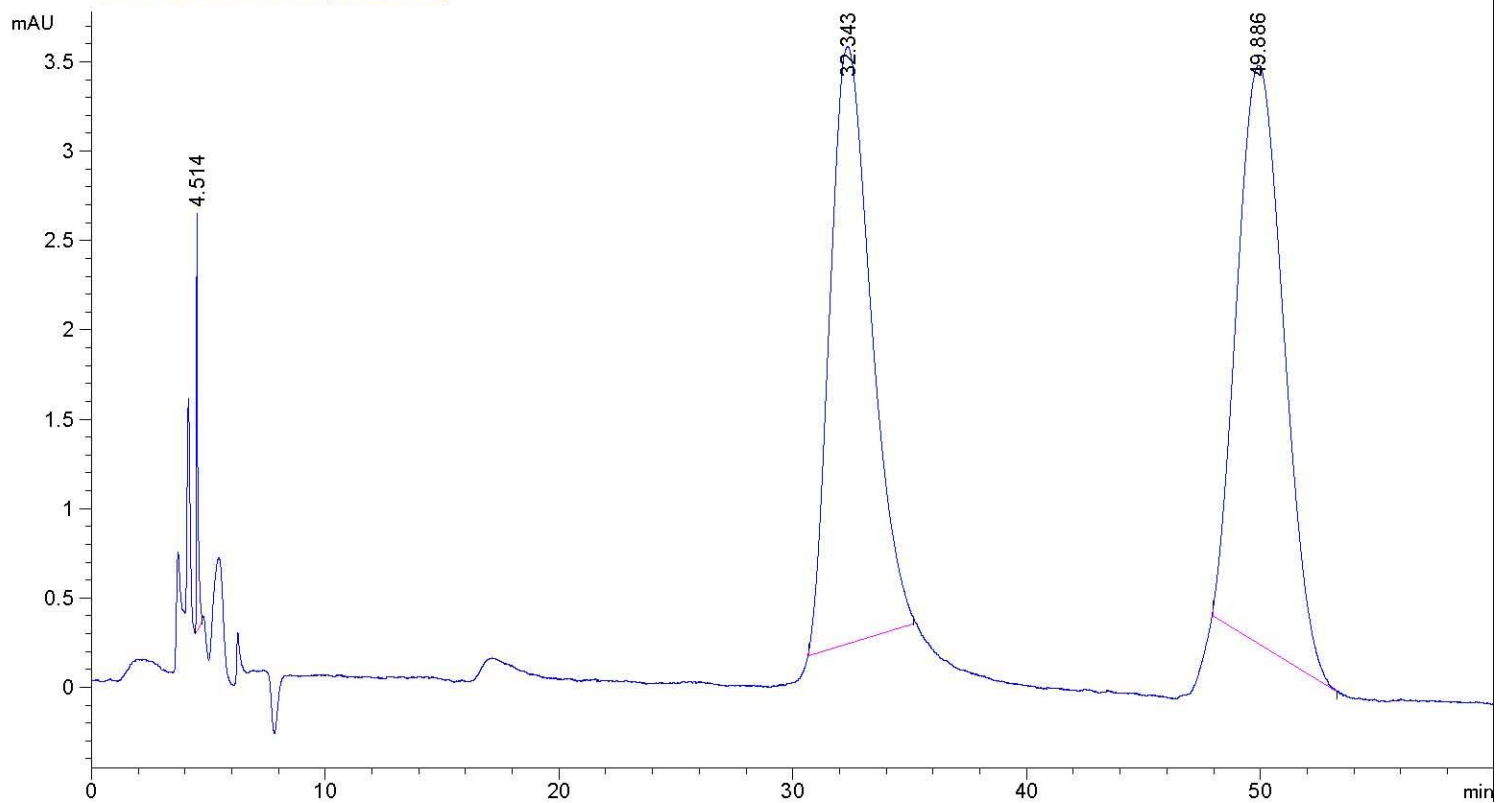

| Peak | Ret Time [min] | Height [mV*sec] | Area [mV] | Aear [%] |
|------|----------------|-----------------|-----------|----------|
| 1    | 32.343         | 3.34417         | 408.73773 | 47.1587  |
| 2    | 49.886         | 3.23238         | 448.21954 | 51.7140  |

Compound **5h-p-CIBn**

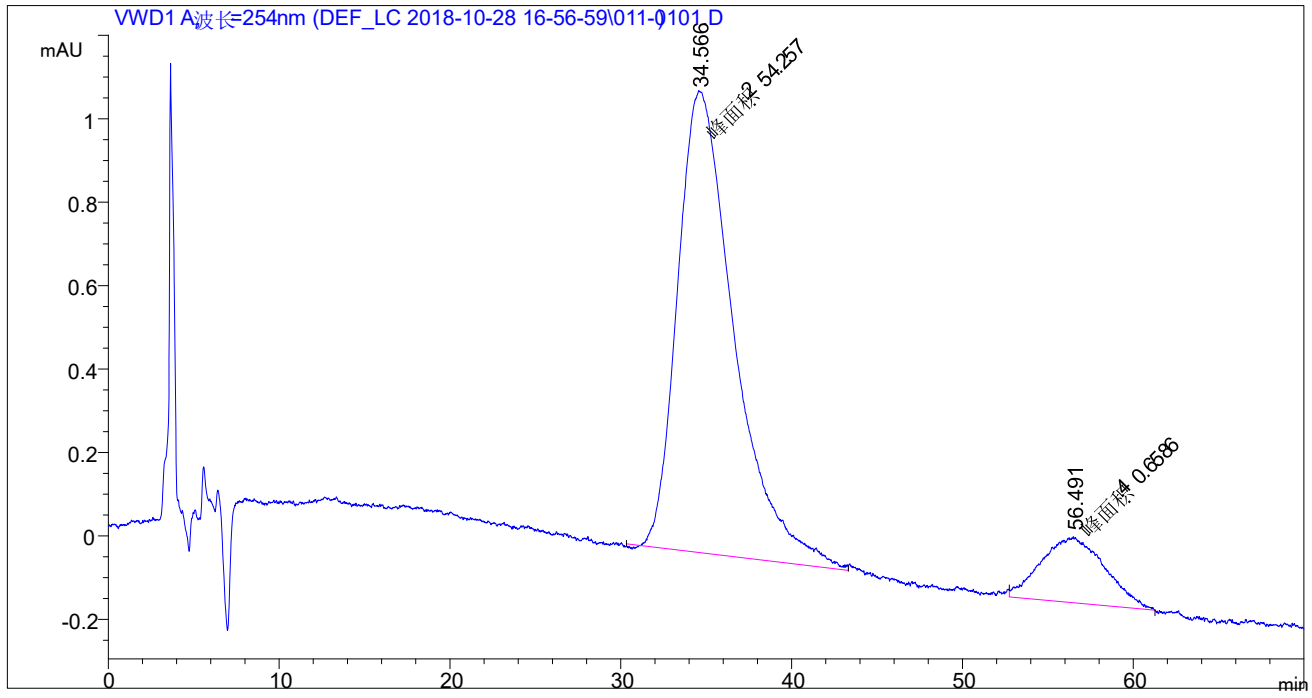

| Peak | Ret Time [min] | Height [mV*sec] | Area [mV] | Aear [%] |
|------|----------------|-----------------|-----------|----------|
| 1    | 34.566         | 1.10731         | 254.25696 | 86.2135  |
| 2    | 56.491         | 1.58646e-1      | 40.65862  | 13.7865  |

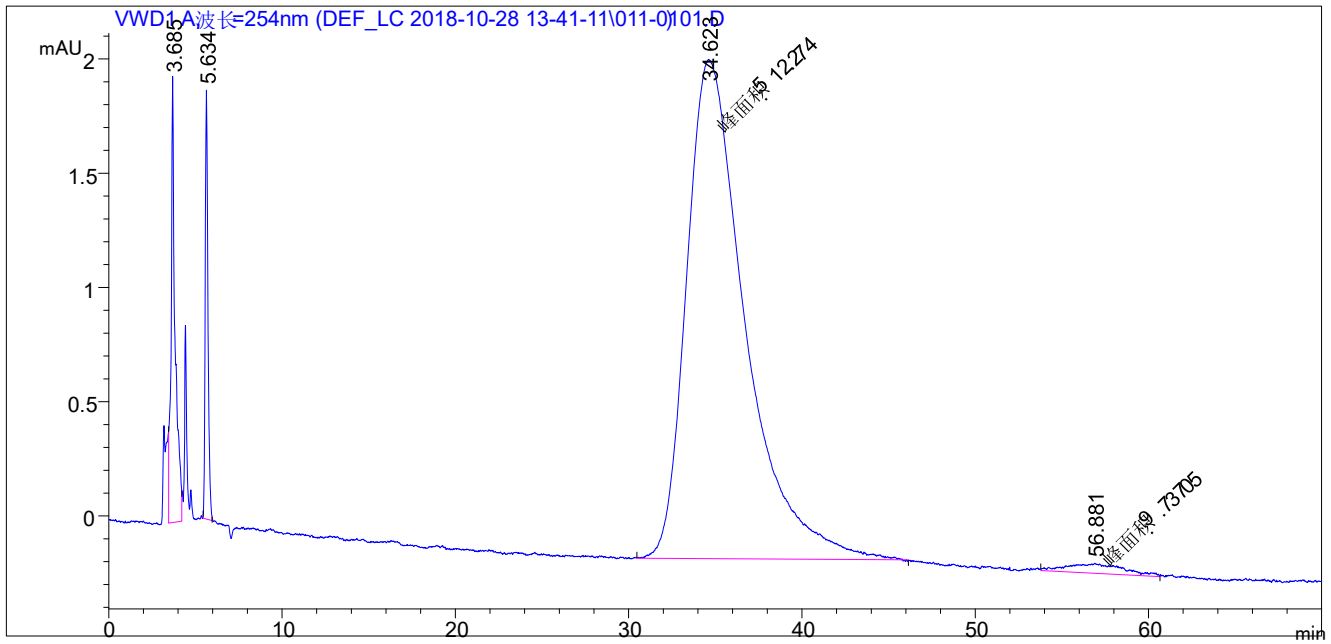

| Peak | Ret Time [min] | Height [mV*sec] | Area [mV] | Aear [%] |
|------|----------------|-----------------|-----------|----------|
| 1    | 34.623         | 2.18480         | 512.27380 | 89.1234  |
| 2    | 56.881         | 4.43100e-2      | 9.73705   | 1.6940   |

Compound **5l-Bn dl**

VWD1 A, 波长=254 nm (002-0101.D)

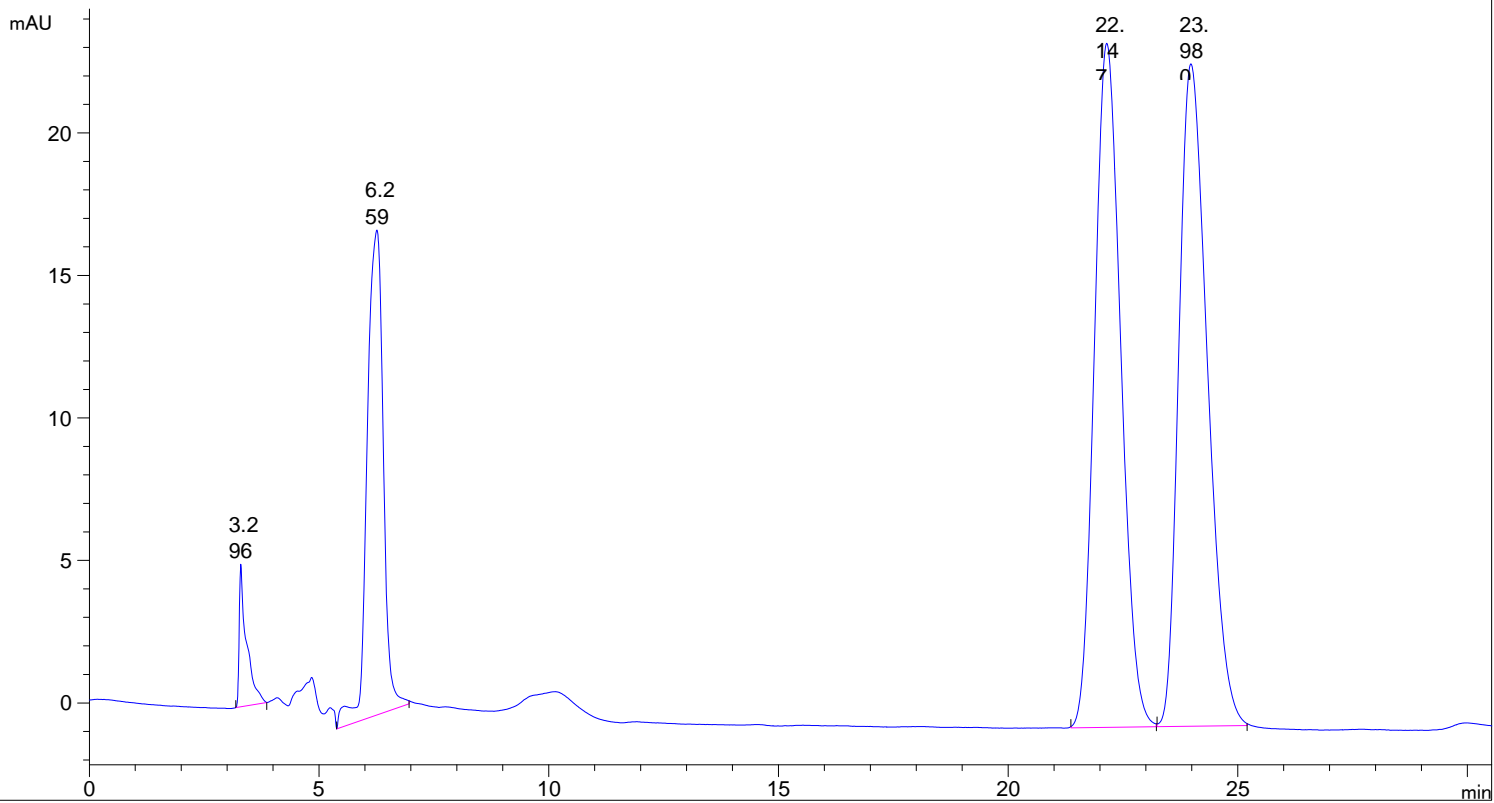

| Peak | Ret Time [min] | Height [mV*sec] | Area [mV]  | Aear [%] |
|------|----------------|-----------------|------------|----------|
| 1    | 22.147         | 24.00043        | 958.59290  | 39.2928  |
| 2    | 23.980         | 23.24430        | 1006.06158 | 41.2385  |



# Compound 5I-Bn Cat

VWD1 A, 波长=254 nm (001-0101.D)

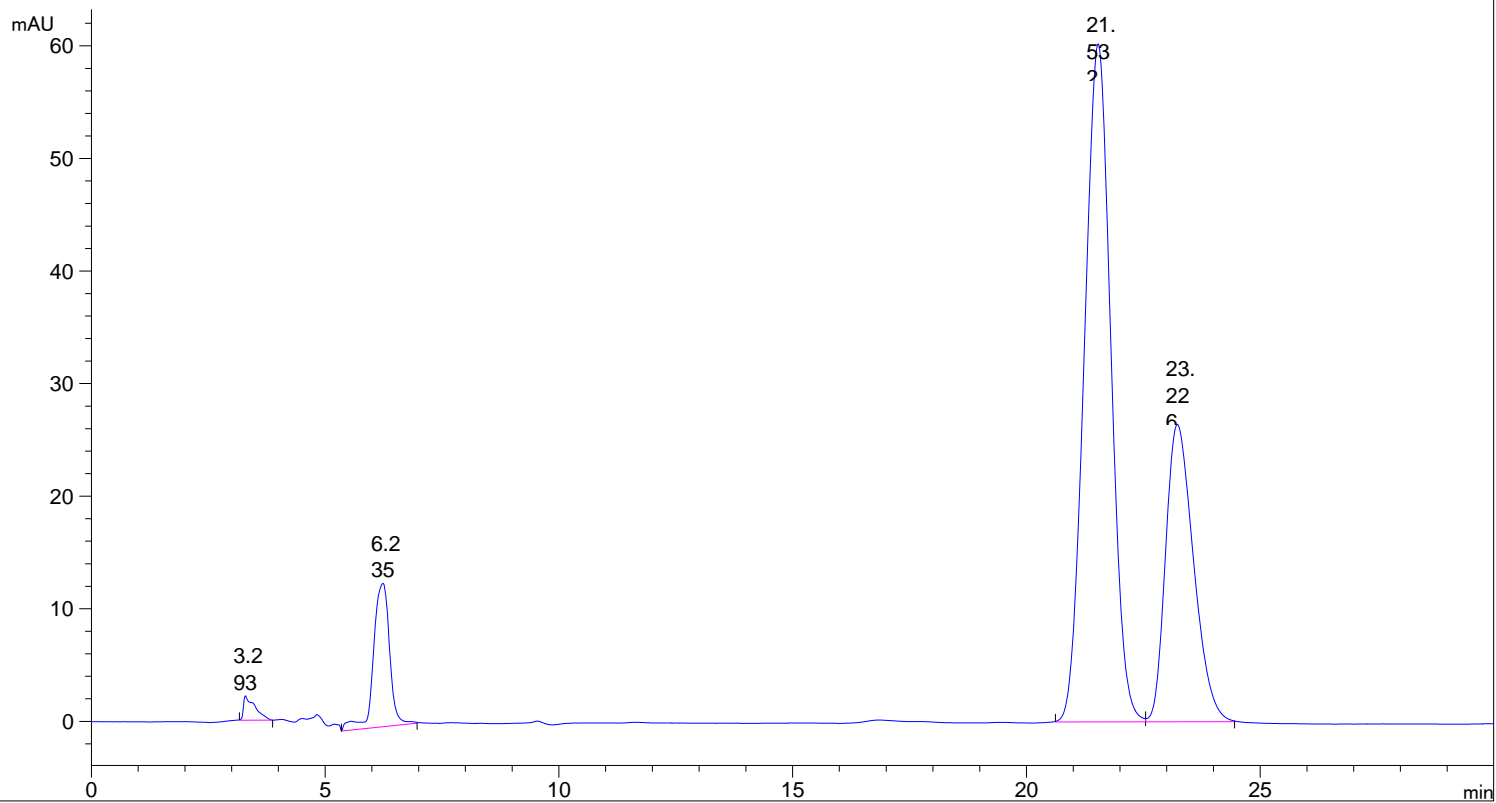

| Peak | Ret Time [min] | Height [mV*sec] | Area [mV]  | Aear [%] |
|------|----------------|-----------------|------------|----------|
| 1    | 21.532         | 60.22359        | 2365.11938 | 62.0958  |
| 2    | 23.226         | 26.42085        | 1097.69263 | 28.8198  |
